# Supplementary material for: Effects of BRD4 inhibitor JQ1 on the expression profile of super-enhancer related lncRNAs and mRNAs in cervical cancer HeLa cells
Source: PeerJ. 2024 Feb 23;12:e17035. doi: 10.7717/peerj.17035 (PMC10896078; doi:10.7717/peerj.17035)
Supplement: Supplemental Information 3 [file peerj-12-17035-s003.xlsx]

## Sheet: Sheet1
Raw data for Table 2: The effects of JQ1 on the proliferation of cervical cancer HeLa cells at different concentrations and at different times
JQ1 treated for	24 h					48 h					72 h					120 h
	DMSO	0.01umol/L	0.1umol/L	1umol/L		DMSO	0.01umol/L	0.1umol/L	1umol/L		DMSO	0.01umol/L	0.1umol/L	1umol/L		DMSO	0.01umol/L	0.1umol/L	1umol/L
	1.591	1.595	1.224	1.162		1.66	1.469	1.282	1.13		1.72	1.5	1.399	0.894		1.506	1.208	0.636	0.661
	1.684	1.525	1.206	1.184		1.673	1.416	1.294	1.125		1.721	1.573	1.313	0.873		1.497	1.175	0.61	0.606
	1.644	1.525	1.265	1.111		1.644	1.397	1.287	1.126		1.764	1.5	1.461	0.902		1.557	1.259	0.634	0.613
	1.586	1.56	1.291	1.157		1.512	1.427	1.37	1.1		1.795	1.53	1.303	0.858		1.515	1.205	0.601	0.603
	1.635	1.528	1.236	1.13		1.681	1.4	1.239	1.189		1.774	1.581	1.465	0.915		1.522	1.238	0.61	0.6
	1.68	1.578	1.284	1.174		1.555	1.421	1.228	1.177		1.769	1.585	1.452	0.852		1.556	1.235	0.601	0.601
	1.63667					1.62083					1.75717					1.5255
Background value	0.015					0.012					0.015					0.013
Subtracting background value	1.576	1.58	1.209	1.147		1.648	1.457	1.27	1.118		1.705	1.485	1.384	0.879		1.493	1.195	0.623	0.648
	1.669	1.51	1.191	1.169		1.661	1.404	1.282	1.113		1.706	1.558	1.298	0.858		1.484	1.162	0.597	0.593
	1.629	1.51	1.25	1.096		1.632	1.385	1.275	1.114		1.749	1.485	1.446	0.887		1.544	1.246	0.621	0.6
	1.571	1.545	1.276	1.142		1.5	1.415	1.358	1.088		1.78	1.515	1.288	0.843		1.502	1.192	0.588	0.59
	1.62	1.513	1.221	1.115		1.669	1.388	1.227	1.177		1.759	1.566	1.45	0.9		1.509	1.225	0.597	0.587
	1.665	1.563	1.269	1.159		1.543	1.409	1.216	1.165		1.754	1.57	1.437	0.837		1.543	1.222	0.588	0.588
Average value	1.62167					1.60883					1.74217					1.5125
Inhibition rate	0.0281603	0.0256937	0.254471	0.292703		-0.0243448	0.0943748	0.210608	0.305087		0.0213336	0.147613	0.205587	0.495456		0.0128926	0.209917	0.588099	0.57157
	-0.0291881	0.0688592	0.26557	0.279137		-0.0324252	0.127318	0.203149	0.308194		0.0207596	0.105711	0.254951	0.50751		0.018843	0.231736	0.605289	0.607934
	-0.0045221	0.0688592	0.229188	0.324152		-0.0143997	0.139128	0.2075	0.307573		-0.00392232	0.147613	0.169999	0.490864		-0.0208264	0.176198	0.589421	0.603306
	0.0312436	0.0472765	0.213155	0.295786		0.0676474	0.120481	0.15591	0.323734		-0.0217163	0.130393	0.260691	0.51612		0.00694215	0.211901	0.61124	0.609917
	0.00102775	0.0670092	0.247071	0.312436		-0.0373977	0.137263	0.237336	0.268414		-0.0096623	0.101119	0.167703	0.483402		0.00231405	0.190083	0.605289	0.611901
	-0.0267215	0.0361768	0.217472	0.285303		0.0409199	0.12421	0.244173	0.275873		-0.00679231	0.0988233	0.175165	0.519564		-0.0201653	0.192066	0.61124	0.61124
	7.40149e-17	0.0523124	0.237821	0.298253		-1.29526e-16	0.123796	0.209779	0.298146		-5.55112e-17	0.121879	0.205683	0.502152		5.55112e-17	0.201983	0.601763	0.602645
Inhibition rate for analysis	2.8	2.6	25.4	29.3		-2.4	9.4	21.1	30.5		2.1	14.8	20.6	49.5		1.3	21	58.8	57.2
	-2.9	6.9	26.6	27.9		-3.2	12.7	20.3	30.8		2.1	10.6	25.5	50.8		1.9	23.2	60.5	60.8
	-0.5	6.9	22.9	32.4		-1.4	13.9	20.8	30.8		-0.4	14.8	17	49.1		-2.1	17.6	58.9	60.3
	3.1	4.7	21.3	29.6		6.8	12	15.6	32.4		-2.2	13	26.1	51.6		0.7	21.2	61.1	61
	0.1	6.7	24.7	31.2		-3.7	13.7	23.7	26.8		-1	10.1	16.8	48.3		0.2	19	60.5	61.2
	-2.7	3.6	21.7	28.5		4.1	12.4	24.4	27.6		-0.7	9.9	17.5	52		-2	19.2	61.1	61.1
