# Supplementary material for: Effects of BRD4 inhibitor JQ1 on the expression profile of super-enhancer related lncRNAs and mRNAs in cervical cancer HeLa cells
Source: PeerJ. 2024 Feb 23;12:e17035. doi: 10.7717/peerj.17035 (PMC10896078; doi:10.7717/peerj.17035)
Supplement: Supplemental Information 5 [file peerj-12-17035-s005.xlsx]

## Sheet: Supplementary Table S1
Supplementary Table S1 | Main equipment and reagents.
Main Equipment and Reagents	Manufacturer
NanoDrop 2000	Thermo Fisher Scientific, USA
Invitrogen Qubit 3.0	Spectrophotometer Thermo Fisher Scientific, USA
ABI 2720 Thermal Cycler	Thermo Fisher Scientific, USA
Eppendorf 5810R	Centrifuge Eppendorf, Germany
Agilent 2100 bioanalyzer	Agilent Technologies, USA
Illumina cbot Cluster Station	Illumina, USA
Illumina novaseq 6000	Illumina, USA
Ambion Magnetic Stand	Thermo Fisher Scientific, USA
TruSeq Stranded Total RNA Library Prep Kit	Illumina, USA
SuperScript IV Reverse Transcriptase	Thermo Fisher Scientific, USA
TruSeq PE Cluster Kit v3-cBot-HS	Illumina, USA
TruSeq SBS Kit v3 – HS	Illumina, USA
Agencourt SPRIselect Reagent Kit	Beckman Coulter, USA
