# Supplementary material for: Effects of BRD4 inhibitor JQ1 on the expression profile of super-enhancer related lncRNAs and mRNAs in cervical cancer HeLa cells
Source: PeerJ. 2024 Feb 23;12:e17035. doi: 10.7717/peerj.17035 (PMC10896078; doi:10.7717/peerj.17035)
Supplement: Supplemental Information 6 [file peerj-12-17035-s006.xlsx]

## Sheet: Supplementary Table S2
Supplementary Table S2 | Results of SE-lncRNAs screening and matching.
Gene	logFC	AveExpr	t	PValue	FDR	diffsig
GAS6-AS1	-3.865	9.724	-19.296	<0.001	<0.001	Down
GCAWKR	-1.754	10.955	-14.806	<0.001	0.001	Down
ELF3-AS1	-2.257	9.556	-13.104	<0.001	0.002	Down
LINC01963	-1.285	12.088	-13.131	<0.001	0.002	Down
PCAT7	-2.329	8.563	-11.953	<0.001	0.003	Down
AGAP2-AS1	-2.557	8.885	-10.856	<0.001	0.003	Down
PRECSIT	-1.334	11.884	-10.663	<0.001	0.003	Down
IRF1-AS1	-2.536	7.903	-10.296	<0.001	0.003	Down
SP2-AS1	-2.167	7.801	-8.823	<0.001	0.005	Down
FAM151B-DT	-1.673	10.121	-8.366	<0.001	0.006	Down
MIR3936HG	-1.695	8.569	-8.188	<0.001	0.006	Down
STX18-AS1	-1.617	8.056	-8.151	<0.001	0.006	Down
LINC01303	-1.805	8.229	-8.144	<0.001	0.006	Down
LINC02977	-1.361	8.88	-8.158	<0.001	0.006	Down
BAIAP2-DT	-1.284	9.642	-8.177	<0.001	0.006	Down
SNHG14	-2.091	7.901	-7.895	<0.001	0.006	Down
LINC02873	-7.017	4.054	-10.639	<0.001	0.003	Down
FOXP4-AS1	-5.829	3.453	-9.879	<0.001	0.003	Down
LINC01106	-1.386	9.314	-7.376	<0.001	0.008	Down
EIF2AK3	-6.464	3.775	-9.325	<0.001	0.004	Down
CYP4F26P	-2.943	6.72	-7.469	<0.001	0.008	Down
MIRLET7IHG	-1.657	12.683	-7.74	<0.001	0.007	Down
FRGCA	-1.557	7.968	-6.942	<0.001	0.01	Down
LINC02615	-2.079	6.818	-6.98	<0.001	0.01	Down
ELFN1-AS1	-1.248	10.29	-7.083	<0.001	0.01	Down
ZNF232-AS1	-1.367	8.398	-6.804	<0.001	0.011	Down
PINCR	-1.715	7.26	-6.469	<0.001	0.013	Down
COP1-DT	-1.839	6.842	-6.248	<0.001	0.013	Down
LLPH-DT	-1.606	7.36	-6.23	<0.001	0.013	Down
ZNRD2-DT	-2.774	6.186	-6.494	<0.001	0.012	Down
KCNC4-DT	-4.892	2.989	-7.567	<0.001	0.008	Down
LINC01776	-2.669	6.438	-6.343	<0.001	0.013	Down
FENDRR	-2.606	6.318	-6.333	<0.001	0.013	Down
PITX1-AS1	-1.609	7.147	-6.096	<0.001	0.014	Down
ESAM-AS1	-4.801	2.951	-7.289	<0.001	0.008	Down
LINC01910	-1.384	9.49	-6.253	<0.001	0.013	Down
HYI-AS1	-4.941	3.01	-7.169	<0.001	0.009	Down
LINC01348	-1.628	8.73	-6.13	<0.001	0.014	Down
UBE2E1-AS1	-5.399	3.229	-6.673	<0.001	0.011	Down
LINC01444	-4.835	2.973	-6.627	<0.001	0.011	Down
SOS1-IT1	-1.025	9.907	-5.987	<0.001	0.015	Down
LINC02870	-4.229	2.659	-6.771	<0.001	0.011	Down
LINC01410	-1.568	8.23	-5.717	<0.001	0.017	Down
LINC01285	-4.11	2.593	-6.638	<0.001	0.011	Down
TMLHE-AS1	-1.892	6.651	-5.526	<0.001	0.019	Down
SERPINB9P1	-2.189	7.99	-5.571	<0.001	0.019	Down
LINC01498	-4.063	2.58	-6.389	<0.001	0.013	Down
LINC00313	-3.421	5.412	-5.974	<0.001	0.015	Down
LINC02732	-3.972	2.532	-6.386	<0.001	0.013	Down
LGALSL-DT	-1.694	6.991	-5.324	<0.001	0.022	Down
LINC00987	-5.909	4.76	-6.033	<0.001	0.015	Down
C2orf49-DT	-1.404	9.608	-5.541	<0.001	0.019	Down
LINC01977	-3.083	5.54	-5.52	<0.001	0.019	Down
FAM201A	-1.157	8.692	-5.374	<0.001	0.022	Down
LINC02009	-4.413	2.757	-5.78	<0.001	0.017	Down
IRS4	-3.756	2.421	-5.997	<0.001	0.015	Down
DHRS4-AS1	-1.41	9.102	-5.344	<0.001	0.022	Down
THBS2-AS1	-4.907	3.014	-5.523	<0.001	0.019	Down
HLA-F-AS1	-1.553	7.5	-5.082	0.001	0.026	Down
FSIP2-AS1	-3.685	2.384	-5.809	<0.001	0.017	Down
LINC02236	-1.964	6.473	-4.979	0.001	0.028	Down
LINC02904	-1.217	7.565	-5.029	0.001	0.027	Down
LINC00392	-3.798	2.434	-5.605	<0.001	0.019	Down
RMEL3	-4.527	2.79	-5.366	<0.001	0.022	Down
MRPS30-DT	-2.365	5.961	-4.946	0.001	0.028	Down
OBSCN-AS1	-1.237	7.449	-4.949	0.001	0.028	Down
LINC02861	-1.55	7.273	-4.909	0.001	0.028	Down
OGFRP1	-1.478	8.966	-5.081	0.001	0.026	Down
ARMCX5-GPRASP2	-1.827	7.227	-4.86	0.002	0.028	Down
PAX8-AS1	-2.433	6.148	-4.83	0.002	0.029	Down
LOXL1-AS1	-2.733	5.354	-5.013	0.001	0.027	Down
PRRT3-AS1	-1.779	8.13	-4.93	0.001	0.028	Down
CHMP1B-AS1	-2.031	6.743	-4.787	0.002	0.03	Down
PABPC5-AS1	-4.811	2.959	-5.105	0.001	0.025	Down
LINC01843	-5.501	4.552	-5.154	0.001	0.025	Down
CASC23	-3.92	2.495	-5.298	<0.001	0.022	Down
MELTF-AS1	-2.157	5.899	-4.781	0.002	0.03	Down
EGOT	-5.262	4.583	-5.155	0.001	0.025	Down
LINC01814	-4.4	2.746	-5.126	0.001	0.025	Down
TMEM105	-4.235	3.486	-5.146	0.001	0.025	Down
PLXNB3-AS1	-1.283	7.065	-4.766	0.002	0.03	Down
TSPAN14-AS1	-3.968	2.54	-5.202	0.001	0.024	Down
ITGB2-AS1	-5.411	3.227	-4.913	0.001	0.028	Down
BASP1-AS1	-1.485	7.012	-4.633	0.002	0.034	Down
LINC00623	-1.327	7.536	-4.654	0.002	0.033	Down
LINC02875	-4.247	2.648	-4.828	0.002	0.029	Down
CARMN	-3.529	2.314	-4.97	0.001	0.028	Down
GATA3-AS1	-3.815	2.456	-4.885	0.002	0.028	Down
DENND6A-AS1	-3.871	2.466	-4.878	0.002	0.028	Down
LINC01695	-2.901	6.064	-4.489	0.002	0.038	Down
SCAT2	-3.706	2.401	-4.886	0.002	0.028	Down
LINC00525	-1.839	7.226	-4.397	0.003	0.041	Down
LINC02065	-1.446	7.304	-4.414	0.003	0.04	Down
LINC01825	-4.651	3.667	-4.537	0.002	0.036	Down
KCNH1-IT1	-1.762	6.189	-4.224	0.003	0.047	Down
SNHG18	-3.339	2.208	-4.598	0.002	0.035	Down
RRN3P2	-1.237	7.69	-4.327	0.003	0.043	Down
MIR99AHG	-1.104	7.104	-4.211	0.004	0.047	Down
LINC00504	-4.594	4.354	-4.295	0.003	0.044	Down
LINC01411	-1.116	7.337	-4.214	0.003	0.047	Down
LINC01396	-3.092	2.093	-4.425	0.003	0.04	Down
LINC01339	-3.28	2.173	-4.375	0.003	0.041	Down
DLG2-AS2	-3.413	2.256	-4.296	0.003	0.044	Down
LINC00652	-3.056	2.067	-4.355	0.003	0.042	Down
UBXN7-AS1	-3.692	4.384	-4.17	0.004	0.049	Down
C1RL-AS1	-0.996	10.949	-8.671	<0.001	0.005	Not
COPG2IT1	-0.979	10.548	-8.002	<0.001	0.006	Not
CHURC1	0.854	11.368	8.074	<0.001	0.006	Not
LINC00938	0.775	12.392	8.169	<0.001	0.006	Not
NIPBL-DT	0.5	12.534	7.701	<0.001	0.007	Not
ZNF443	0.624	11.803	7.339	<0.001	0.008	Not
FOXD2-AS1	-0.896	11.1	-6.801	<0.001	0.011	Not
LINC02591	-0.888	9.898	-6.439	<0.001	0.013	Not
CCDC183-AS1	0.957	10.835	6.522	<0.001	0.012	Not
ZNF132-DT	-0.98	9.696	-6.201	<0.001	0.014	Not
MIR29B2CHG	-0.903	10.21	-6.134	<0.001	0.014	Not
HEIH	-0.907	9.957	-6.062	<0.001	0.014	Not
SNHG32	-0.992	10.295	-5.968	<0.001	0.015	Not
ACAD9-DT	0.687	11.108	6.128	<0.001	0.014	Not
ALDH1A3-AS1	-0.963	9.021	-5.743	<0.001	0.017	Not
SLFNL1-AS1	0.534	12.173	6.278	<0.001	0.013	Not
DNAH17-AS1	-0.933	8.826	-5.454	<0.001	0.02	Not
USP10	0.765	11.625	5.902	<0.001	0.015	Not
RNASEH1-DT	-0.923	9.668	-5.278	<0.001	0.022	Not
NUDT16-DT	-0.816	8.794	-5.089	0.001	0.026	Not
GJD3-AS1	-0.707	10.639	-5.349	<0.001	0.022	Not
LINC02019	-0.931	8.353	-4.88	0.002	0.028	Not
EMSLR	-0.976	8.596	-4.893	0.002	0.028	Not
MORF4L2-AS1	-0.956	8.625	-4.848	0.002	0.029	Not
POLI	0.87	10.038	4.972	0.001	0.028	Not
LINC01537	0.864	10.154	4.991	0.001	0.028	Not
ARIH2OS	0.963	8.435	4.701	0.002	0.032	Not
PLS3-AS1	-0.892	8.876	-4.596	0.002	0.035	Not
EDIL3-DT	-0.92	8.009	-4.441	0.003	0.039	Not
OIP5-AS1	-0.993	8.821	-4.529	0.002	0.037	Not
LDLRAD4	-0.677	9.665	-4.588	0.002	0.035	Not
SPAG5-AS1	2.004	5.979	4.13	0.004	0.05	Not
NNT-AS1	-0.918	10.449	-4.674	0.002	0.033	Not
EMILIN1	-0.85	9.749	-4.561	0.002	0.036	Not
ZNF8-DT	0.659	9.964	4.559	0.002	0.036	Not
ZNF197-AS1	-1.374	7.037	-4.136	0.004	0.05	Not
CNNM3-DT	1.26	6.509	4.066	0.004	0.052	Not
HPS1-AS1	0.919	8.517	4.294	0.003	0.044	Not
ABALON	1.529	7.154	4.111	0.004	0.051	Not
CERNA3	-4.746	2.928	-4.104	0.004	0.051	Not
FAM111A-DT	-0.82	8.105	-4.227	0.003	0.047	Not
CD44-DT	1.496	7.043	4.091	0.004	0.051	Not
PRPF31-AS1	4.415	6.478	3.988	0.005	0.056	Not
TYMSOS	-1.159	7.121	-4.068	0.004	0.052	Not
LINC01270	-1.154	7.539	-4.1	0.004	0.051	Not
OSER1-DT	0.971	7.538	4.103	0.004	0.051	Not
LINC00899	-5.066	5.09	-4.078	0.004	0.052	Not
PRKCH-AS1	-3.877	2.486	-4.083	0.004	0.052	Not
RIPK2-DT	-0.958	8.253	-4.153	0.004	0.05	Not
FAM225A	-0.893	7.985	-4.116	0.004	0.051	Not
SNHG8	0.491	10.507	4.485	0.002	0.038	Not
RNF213-AS1	0.875	8.426	4.165	0.004	0.049	Not
LIFR-AS1	0.903	7.766	4.06	0.004	0.052	Not
HDAC11-AS1	-4.199	2.652	-3.961	0.005	0.057	Not
ARHGAP42-AS1	-4.377	4.427	-3.955	0.005	0.058	Not
SNHG26	2.112	7.332	3.953	0.005	0.058	Not
SYNE1-AS1	-3.148	2.127	-4.067	0.004	0.052	Not
LINC01460	-5.577	3.336	-3.862	0.006	0.063	Not
FRMD3-AS1	1.745	6.46	3.861	0.006	0.063	Not
FSIP2-AS2	3.011	2.047	4.139	0.004	0.05	Not
EIF1B-AS1	-1.936	5.236	-3.826	0.006	0.065	Not
POT1-AS1	-1.385	6.058	-3.822	0.006	0.065	Not
C1QTNF7-AS1	3.324	3.09	4.009	0.005	0.055	Not
LRRC8C-DT	1.409	6.214	3.822	0.006	0.065	Not
SNHG29	-0.454	11.136	-4.499	0.002	0.038	Not
LINC01227	3.049	2.344	4.027	0.004	0.054	Not
LINC02598	-3.543	2.332	-3.91	0.005	0.061	Not
KPNB1-DT	1.615	6.109	3.761	0.006	0.068	Not
TMEM92-AS1	-4.096	4.082	-3.84	0.006	0.065	Not
SNX10-AS1	-3.336	3.156	-3.863	0.006	0.063	Not
FOCAD-AS1	4.052	3.445	3.818	0.006	0.065	Not
GLIPR1-AS1	-0.994	8.409	-4.002	0.005	0.055	Not
MAP2K5-DT	0.993	8.877	4.07	0.004	0.052	Not
ARHGEF26-AS1	4.307	4.05	3.801	0.006	0.065	Not
MYOSLID	-2.959	5.492	-3.692	0.007	0.072	Not
ENTPD3-AS1	-0.936	7.221	-3.838	0.006	0.065	Not
CCDC92B	-1.769	7.245	-3.815	0.006	0.065	Not
AATBC	-4.752	4.684	-3.756	0.006	0.069	Not
UNC5C-AS1	2.043	7.245	3.802	0.006	0.065	Not
SCAT1	-1.402	5.796	-3.654	0.007	0.073	Not
CDKN1B	0.647	9.356	4.097	0.004	0.051	Not
NARF-AS2	2.807	7.381	3.771	0.006	0.068	Not
SLIT2-IT1	2.958	5.078	3.666	0.007	0.073	Not
BMS1P4	2.406	7.78	3.832	0.006	0.065	Not
GATA2-AS1	-0.863	9.246	-4.052	0.004	0.052	Not
NUDT19-DT	1.42	7.394	3.804	0.006	0.065	Not
LINC01909	-1.63	6.649	-3.688	0.007	0.072	Not
WEE2-AS1	-3.192	3.901	-3.718	0.007	0.07	Not
HDAC2-AS2	-3.229	2.142	-3.747	0.006	0.069	Not
CDK13-DT	0.913	8.803	3.965	0.005	0.057	Not
KRTAP5-AS1	-3.445	3.314	-3.684	0.007	0.072	Not
LINC02015	-3.116	2.115	-3.736	0.007	0.07	Not
NHSL1-AS1	1.288	7.706	3.805	0.006	0.065	Not
PRNCR1	0.391	11.861	4.45	0.003	0.039	Not
HNRNPD-DT	3.356	6.084	3.557	0.008	0.08	Not
GASAL1	1.05	6.989	3.695	0.007	0.072	Not
RAB5C-AS1	3.24	3.817	3.659	0.007	0.073	Not
C2CD4D-AS1	-4.319	4.06	-3.588	0.008	0.079	Not
FBXL19-AS1	-0.601	12.284	-4.489	0.002	0.038	Not
OTULIN-DT	0.642	10.997	4.236	0.003	0.046	Not
ERRFI1-DT	1.501	6.474	3.585	0.008	0.079	Not
PRSS23-AS1	2.692	4.912	3.518	0.009	0.082	Not
LINC01122	-2.863	2.552	-3.629	0.008	0.076	Not
LINC00390	3.111	3.333	3.61	0.008	0.077	Not
GS1-24F4.2	-3.428	4.916	-3.544	0.009	0.08	Not
LINC01915	-2.709	4.449	-3.564	0.008	0.08	Not
LINC00589	-2.304	5.168	-3.486	0.009	0.084	Not
NOP9	0.631	9.998	4.051	0.004	0.052	Not
LINC00659	3.491	3.423	3.575	0.008	0.079	Not
EEF1A1	2.783	1.932	3.69	0.007	0.072	Not
SBF2-AS1	-0.852	7.379	-3.675	0.007	0.072	Not
LINC02883	4.225	4.28	3.535	0.009	0.081	Not
ZNF529-AS1	-0.924	7.8	-3.725	0.007	0.07	Not
FAM83C-AS1	-1.291	6.494	-3.544	0.009	0.08	Not
EIF2AK3-DT	0.728	8.959	3.885	0.005	0.063	Not
STEAP1B-AS1	-3.584	5.442	-3.462	0.01	0.086	Not
C1orf21-DT	-1.295	5.999	-3.471	0.01	0.086	Not
RELA-DT	1.98	6.824	3.553	0.008	0.08	Not
DENND5B-AS1	1.511	5.697	3.449	0.01	0.087	Not
EMC1-AS1	1.117	7.972	3.724	0.007	0.07	Not
SARDH	1.196	7.748	3.688	0.007	0.072	Not
LINC00184	3.588	3.592	3.502	0.009	0.083	Not
PRMT5-DT	3.938	5.216	3.439	0.01	0.087	Not
SLC16A4-AS1	-0.598	11.768	-4.287	0.003	0.044	Not
CHKB-DT	1.318	6.779	3.546	0.009	0.08	Not
GAS5	-0.756	9.232	-3.869	0.005	0.063	Not
SNHG10	-0.729	8.025	-3.702	0.007	0.072	Not
SP2-DT	-1.556	6.847	-3.523	0.009	0.082	Not
KIF26A-DT	-4.287	4.354	-3.442	0.01	0.087	Not
ARF4-AS1	1.04	7.132	3.567	0.008	0.08	Not
ATXN7L3-AS1	-3.366	2.227	-3.464	0.01	0.086	Not
MIR34AHG	-5.568	8.653	-3.519	0.009	0.082	Not
LINC02874	-3.137	4.468	-3.407	0.01	0.09	Not
LNCTAM34A	-1.802	5.065	-3.345	0.011	0.094	Not
MMP25-AS1	-1.215	7.76	-3.599	0.008	0.078	Not
LINC01186	-1.823	6.83	-3.444	0.01	0.087	Not
PAN3-AS1	0.707	9.419	3.829	0.006	0.065	Not
LINC03033	-6.19	6.125	-3.344	0.011	0.094	Not
CHD1-DT	-1.225	7.248	-3.516	0.009	0.082	Not
SCGB1B2P	-3.348	4.571	-3.363	0.011	0.093	Not
PKD1P6-NPIPP1	5.55	6.033	3.32	0.012	0.096	Not
LINC02412	-3.211	3.202	-3.368	0.011	0.092	Not
ZRANB2-DT	-2.862	3.334	-3.378	0.011	0.092	Not
LCMT1-AS1	-3.388	2.25	-3.367	0.011	0.092	Not
IRF2-DT	0.699	9.697	3.849	0.006	0.064	Not
MTMR10	1.051	7.515	3.547	0.009	0.08	Not
LINC02955	2.941	2.213	3.408	0.01	0.09	Not
EPHA1-AS1	3.18	4.159	3.344	0.011	0.094	Not
PDGFA-DT	0.826	7.864	3.576	0.008	0.079	Not
LINC01341	-0.777	7.524	-3.525	0.009	0.082	Not
FAM225B	-0.737	7.819	-3.554	0.008	0.08	Not
LINC03018	0.989	6.925	3.442	0.01	0.087	Not
CEACAM16-AS1	-1.002	7.18	-3.462	0.01	0.086	Not
MYG1-AS1	1.334	6.526	3.374	0.011	0.092	Not
TIFA	3.478	4.653	3.287	0.012	0.099	Not
PAUPAR	2.742	2.438	3.368	0.011	0.092	Not
ARRDC3-AS1	1.073	6.583	3.385	0.011	0.092	Not
BOLA2-SMG1P6	1.035	8.392	3.618	0.008	0.077	Not
LINC00853	-3.498	3.593	-3.276	0.013	0.099	Not
LINC02747	-3.462	2.251	-3.293	0.012	0.098	Not
LINC00482	-3.241	4.378	-3.27	0.013	0.1	Not
LINC00862	0.931	6.643	3.379	0.011	0.092	Not
LINC02986	1.255	7.603	3.493	0.009	0.084	Not
LINC01940	-3.963	5.551	-3.223	0.013	0.103	Not
LINC00639	-3.763	5.292	-3.224	0.013	0.103	Not
SERTAD3-AS1	3.126	3.16	3.275	0.013	0.099	Not
B4GAT1-DT	1.858	5.514	3.217	0.014	0.104	Not
MIR210HG	-2.159	5.984	-3.231	0.013	0.103	Not
MIR22HG	1.326	6.31	3.303	0.012	0.097	Not
LINC02511	-2.734	1.913	-3.307	0.012	0.097	Not
GAR1-DT	3.39	3.555	3.243	0.013	0.102	Not
ARHGAP5-AS1	0.867	9.244	3.689	0.007	0.072	Not
ZNF594-DT	-1.089	6.881	-3.357	0.011	0.093	Not
URB1-AS1	0.592	9.533	3.725	0.007	0.07	Not
FAM215B	-0.536	10.245	-3.826	0.006	0.065	Not
PCOTH	-1.527	5.958	-3.217	0.014	0.104	Not
SERBP1	1.414	7.307	3.406	0.01	0.09	Not
EAF1-AS1	2.796	3.361	3.235	0.013	0.103	Not
LINC00322	-3.893	3.894	-3.183	0.014	0.107	Not
RAD51-AS1	-4.379	7.94	-3.305	0.012	0.097	Not
CEBPA-DT	-3.734	3.825	-3.166	0.015	0.109	Not
LINC00707	-1.207	9.808	-3.719	0.007	0.07	Not
ICA1-AS1	-3.467	3.828	-3.163	0.015	0.109	Not
ZKSCAN2-DT	0.539	10.836	3.889	0.005	0.062	Not
LINC02175	0.819	7.371	3.392	0.011	0.091	Not
CACTIN-AS1	-1.762	7.003	-3.302	0.012	0.097	Not
ANKRD17-DT	1.752	5.019	3.125	0.016	0.113	Not
TFIP11-DT	-0.69	8.837	-3.575	0.008	0.079	Not
C5orf64	2.716	2.201	3.218	0.014	0.104	Not
HOXC-AS3	-3.633	3.914	-3.138	0.015	0.111	Not
TRHDE-AS1	2.514	2.557	3.204	0.014	0.105	Not
LINC02826	-3.86	3.717	-3.12	0.016	0.113	Not
RASSF8-AS1	0.71	7.981	3.444	0.01	0.087	Not
LINC00222	2.838	3.21	3.155	0.015	0.11	Not
LINC03026	-4.08	3.77	-3.099	0.016	0.115	Not
C6orf47-AS1	2.829	3.902	3.121	0.016	0.113	Not
TRIM36-IT1	1.716	7.7	3.366	0.011	0.092	Not
WDR1	0.642	9.899	3.69	0.007	0.072	Not
LRP8-DT	-3.095	3.348	-3.097	0.016	0.115	Not
MIR30DHG	0.38	12.387	4.114	0.004	0.051	Not
FAM88F	2.553	2.259	3.146	0.015	0.11	Not
CEP152	-1.048	7.205	-3.292	0.012	0.098	Not
ST20-AS1	0.656	9.37	3.596	0.008	0.078	Not
RGS5	-1.513	6.501	-3.17	0.015	0.108	Not
LINC00670	-2.861	1.988	-3.105	0.016	0.114	Not
ACOXL-AS1	2.249	5.772	3.073	0.017	0.117	Not
LINC00235	0.573	11.291	3.876	0.005	0.063	Not
ADIRF-AS1	-8.354	4.728	-3.02	0.018	0.123	Not
PIGO-AS1	1.244	7.464	3.304	0.012	0.097	Not
CHFR-DT	-3.878	4.198	-3.029	0.018	0.122	Not
LINC00682	-3.102	3.302	-3.038	0.018	0.121	Not
PHC2-AS1	-1.605	6.005	-3.071	0.017	0.117	Not
ARHGEF2-AS2	0.526	9.313	3.549	0.009	0.08	Not
FAM88C	-3.155	2.099	-3.044	0.017	0.12	Not
LINC01422	1.296	6.799	3.197	0.014	0.106	Not
NOP14-AS1	1.654	6.74	3.176	0.014	0.108	Not
LINC02373	-3.477	3.771	-3.01	0.018	0.124	Not
PRKAG2-AS1	-4.152	5.018	-2.997	0.019	0.126	Not
HDHD5-AS1	-4.141	4.537	-2.991	0.019	0.126	Not
ZMIZ1-AS1	-0.768	7.427	-3.265	0.013	0.1	Not
UBA6-DT	-0.686	8.543	-3.413	0.01	0.09	Not
YTHDF3-DT	1.439	7.001	3.198	0.014	0.106	Not
LINC03004	-4.002	4.123	-2.977	0.019	0.128	Not
RCAN3AS	2.326	1.706	3.056	0.017	0.119	Not
CYP2U1-AS1	1.558	5.884	3.023	0.018	0.122	Not
THORLNC	1.102	6.233	3.08	0.017	0.117	Not
TMEM147-AS1	1.071	7.693	3.28	0.012	0.099	Not
KDM2B-DT	-3.358	5.676	-2.952	0.02	0.132	Not
LINC01426	1.46	4.969	2.946	0.02	0.132	Not
FBXO38-DT	-1.076	6.92	-3.148	0.015	0.11	Not
SPATA13	-3.136	2.126	-2.955	0.02	0.131	Not
PITPNA-AS1	0.609	9.997	3.579	0.008	0.079	Not
LINC00265	-0.933	7.173	-3.173	0.014	0.108	Not
LINC02396	-3.366	3.867	-2.918	0.021	0.136	Not
TNPO1-DT	3.696	5.203	2.906	0.021	0.138	Not
LINC02018	1.916	4.957	2.908	0.021	0.138	Not
RBFOX1	-6.858	7.705	-2.929	0.021	0.135	Not
FAM222A-AS1	-2.48	1.776	-2.966	0.02	0.13	Not
SYNGAP1-AS1	1.331	6.265	3.036	0.018	0.121	Not
PXN-AS1	-0.817	7.055	-3.137	0.015	0.111	Not
LINC00957	-1.676	5.768	-2.914	0.021	0.137	Not
HM13-AS1	3.063	5.011	2.853	0.023	0.146	Not
SNAI3-AS1	0.972	6.662	3.058	0.017	0.119	Not
LINC01376	2.441	4.641	2.845	0.023	0.147	Not
H2AZ1-DT	5.185	4.759	2.842	0.024	0.148	Not
KANSL1-AS1	1.479	6.81	3.051	0.017	0.119	Not
FIRRE	-0.908	7.506	-3.151	0.015	0.11	Not
LINC01725	-2.629	3.729	-2.835	0.024	0.148	Not
ITGA6-AS1	2.891	3.054	2.84	0.024	0.148	Not
MILIP	0.49	11.06	3.667	0.007	0.073	Not
PACERR	1.218	7.799	3.183	0.014	0.107	Not
WDR11-DT	-2.421	3.448	-2.82	0.024	0.149	Not
OXA1L-DT	-2.123	4.392	-2.804	0.025	0.151	Not
PPP1R14B-AS1	-1.052	7.494	-3.12	0.016	0.113	Not
HAGLROS	3.65	4.292	2.799	0.025	0.151	Not
LINC00824	-2.928	3.264	-2.801	0.025	0.151	Not
COA6-AS1	1.329	7.172	3.073	0.017	0.117	Not
EFHD2-AS1	-3.832	3.968	-2.78	0.026	0.154	Not
LINC00304	2.134	3.077	2.813	0.025	0.151	Not
TMEM167B-DT	0.886	10.024	3.469	0.01	0.086	Not
LINC01948	-2.069	5.064	-2.781	0.026	0.154	Not
VIRMA-DT	-1.78	5.852	-2.843	0.023	0.148	Not
C1QTNF1-AS1	-3.366	5.328	-2.771	0.026	0.155	Not
LINC02934	1.59	5.112	2.79	0.025	0.152	Not
ZNF426-DT	-0.946	7.561	-3.106	0.016	0.114	Not
VPS11-DT	3.632	3.274	2.763	0.026	0.156	Not
BBS7-DT	3.49	3.909	2.762	0.026	0.156	Not
CPEB2-DT	-0.999	6.036	-2.88	0.022	0.142	Not
ZNF584-DT	0.392	10.848	3.572	0.008	0.079	Not
LINC00616	2.772	3.032	2.756	0.027	0.156	Not
LINC02872	-1.291	6.079	-2.858	0.023	0.146	Not
LINC02736	2.036	4.932	2.743	0.027	0.157	Not
TMEM123-DT	3.033	3.501	2.728	0.028	0.16	Not
EPIST	-1.519	5.434	-2.763	0.026	0.156	Not
FRG1-DT	-1.084	5.934	-2.83	0.024	0.149	Not
HCP5	-2.23	9.959	-3.365	0.011	0.092	Not
TERC	1.497	5.168	2.745	0.027	0.157	Not
FAM85B	1.012	6.616	2.941	0.02	0.133	Not
DYNC1LI2-DT	1.07	7.644	3.081	0.017	0.117	Not
LINC01605	-2.442	1.771	-2.742	0.027	0.157	Not
LINC01338	2.858	2.975	2.723	0.028	0.16	Not
LINC01255	-2.351	1.718	-2.743	0.027	0.157	Not
LPP-AS2	0.528	9.54	3.344	0.011	0.094	Not
LINC01182	-1.517	5.364	-2.744	0.027	0.157	Not
LINC01778	2.665	2.884	2.717	0.028	0.161	Not
FMNL1-DT	-1.83	6.274	-2.826	0.024	0.149	Not
HOXA11-AS	0.738	7.054	2.994	0.019	0.126	Not
SMIM10L2B-AS1	2.494	3.446	2.702	0.029	0.164	Not
MCM3AP-AS1	-0.634	8.35	-3.155	0.015	0.11	Not
SGMS1-AS1	0.701	9.479	3.317	0.012	0.096	Not
LINC02466	-1.722	4.934	-2.687	0.03	0.167	Not
PPP1R35-AS1	1.826	6.06	2.797	0.025	0.151	Not
NALT1	-1.547	7.314	-2.976	0.019	0.128	Not
LINC02937	-2.718	2.484	-2.674	0.03	0.169	Not
CPNE8-AS1	1.3	6.431	2.863	0.023	0.145	Not
LINC02595	2.308	5.943	2.741	0.027	0.157	Not
NUP153-AS1	-0.743	9.1	-3.226	0.013	0.103	Not
PEG13	0.6	10.361	3.417	0.01	0.09	Not
HEXD-IT1	1.169	7.871	3.053	0.017	0.119	Not
RNF32-AS1	-0.638	8.085	-3.082	0.017	0.117	Not
PIK3IP1-DT	2.953	4.639	2.631	0.032	0.177	Not
LINC02890	2.428	2.908	2.643	0.032	0.175	Not
UBE2D3-AS1	0.889	8.322	3.109	0.016	0.114	Not
PCOLCE-AS1	-1.061	6.407	-2.82	0.024	0.149	Not
LENG8-AS1	-3.864	3.527	-2.615	0.033	0.18	Not
FKBP14-AS1	-2.956	4.465	-2.614	0.033	0.18	Not
LINC01160	-2.981	3.257	-2.614	0.033	0.18	Not
TSPOAP1-AS1	1.479	5.373	2.674	0.03	0.169	Not
ARHGEF4-AS1	-2.579	4.499	-2.611	0.033	0.18	Not
CSE1L-DT	2.168	4.451	2.608	0.033	0.181	Not
MAPKAPK5-AS1	0.766	6.786	2.88	0.022	0.142	Not
PDCD6-DT	1.261	6.065	2.757	0.027	0.156	Not
DOCK7-DT	-3.156	3.908	-2.594	0.034	0.182	Not
H1-10-AS1	-3.783	4.459	-2.591	0.034	0.183	Not
IQCA1-AS1	-2.58	4.564	-2.581	0.035	0.184	Not
MIR4422HG	2.471	4.081	2.576	0.035	0.185	Not
PRKCZ-AS1	-1.283	6.511	-2.786	0.026	0.153	Not
ADNP-AS1	-1.74	5.105	-2.601	0.034	0.181	Not
MAN1B1-DT	0.449	10.533	3.387	0.011	0.092	Not
BOLA3-DT	-1.553	5.429	-2.625	0.032	0.178	Not
hsa-mir-423	2.145	2.12	2.584	0.035	0.184	Not
PPIC-AS1	-0.801	6.523	-2.794	0.025	0.152	Not
VIM-AS1	-0.844	7.171	-2.885	0.022	0.142	Not
TMCC1-DT	-0.947	8.415	-3.048	0.017	0.12	Not
LINC01234	-1.148	5.921	-2.677	0.03	0.169	Not
TFPI2-DT	-1.127	5.978	-2.671	0.03	0.169	Not
BUD13-DT	3.278	4.07	2.52	0.038	0.196	Not
PAXBP1-AS1	1.171	6.804	2.809	0.025	0.151	Not
MALT1-AS1	1.688	7.524	2.896	0.022	0.14	Not
CSGALNACT2-DT	1.004	7.694	2.93	0.021	0.135	Not
ZNNT1	0.893	9.183	3.136	0.015	0.111	Not
RAET1E-AS1	2.128	4.273	2.506	0.039	0.199	Not
LINC02888	2.217	2.48	2.516	0.038	0.197	Not
DUXAP8	0.664	8.82	3.077	0.017	0.117	Not
COSMOC	-0.786	8.199	-2.984	0.019	0.127	Not
MANCR	-1.269	5.279	-2.54	0.037	0.193	Not
LAPTM4A-DT	2.931	5.111	2.499	0.039	0.2	Not
MIPOL1	1.667	5.068	2.515	0.038	0.197	Not
LY6E-DT	-1.562	4.722	-2.481	0.04	0.204	Not
LINC02381	-0.949	6.567	-2.713	0.028	0.162	Not
LINC01583	-2.875	4.788	-2.452	0.042	0.209	Not
LINC00602	-2.105	6.356	-2.616	0.033	0.18	Not
LINC00319	-0.88	6.375	-2.676	0.03	0.169	Not
SLC16A1-AS1	-0.759	9.459	-3.118	0.016	0.113	Not
LINC01117	-2.245	3.309	-2.435	0.043	0.212	Not
CCDC18-AS1	-1.177	6.416	-2.662	0.031	0.17	Not
ALMS1-IT1	0.567	10.397	3.258	0.013	0.101	Not
PNRC1-DT	2.651	5.276	2.473	0.041	0.205	Not
BRWD1-IT1	-1.526	7.069	-2.747	0.027	0.157	Not
MYL12-AS1	1.061	7.375	2.82	0.024	0.149	Not
ZSCAN5A-AS1	1.389	5.155	2.487	0.04	0.203	Not
LINC01149	2.924	3.268	2.418	0.044	0.213	Not
LINC02901	2.122	4.208	2.419	0.044	0.213	Not
PAK6-AS1	3.286	2.167	2.413	0.045	0.215	Not
ETNK1-DT	-2.45	4.094	-2.41	0.045	0.215	Not
IKBKB-DT	1.449	5.693	2.542	0.037	0.193	Not
NCKAP5-IT1	-3.029	2.028	-2.402	0.045	0.215	Not
TWF2-DT	0.595	8.753	2.997	0.019	0.126	Not
LINC01792	-3.401	2.208	-2.397	0.046	0.216	Not
CASC18	3.161	2.107	2.395	0.046	0.217	Not
LRRK2-DT	2.412	4.45	2.403	0.045	0.215	Not
RFX5-AS1	2.922	5.069	2.425	0.044	0.213	Not
MYADM-AS1	-2.904	3.233	-2.394	0.046	0.217	Not
SMC2-DT	1.357	5.273	2.477	0.041	0.204	Not
LINC01913	-1.901	1.493	-2.39	0.046	0.217	Not
DLEU2L	-0.46	10.527	-3.244	0.013	0.102	Not
TRPC7-AS1	2.639	4.316	2.389	0.046	0.217	Not
DOCK9-DT	1.029	7.383	2.792	0.025	0.152	Not
MIA2-AS1	0.664	7.79	2.849	0.023	0.147	Not
LINC02902	-3.767	2.385	-2.383	0.047	0.219	Not
SRI-AS1	3.302	2.174	2.373	0.047	0.219	Not
TAF1A-AS1	-1.168	5.217	-2.448	0.042	0.21	Not
DMTF1-AS1	0.833	6.583	2.667	0.03	0.169	Not
HHIP-AS1	-1.241	5.908	-2.531	0.037	0.194	Not
LINC00520	0.937	6.081	2.582	0.035	0.184	Not
EOGT-DT	1.01	5.983	2.563	0.036	0.189	Not
LINC00159	2.93	1.994	2.361	0.048	0.221	Not
SMARCAL1-AS1	2.93	1.994	2.361	0.048	0.221	Not
LINC02160	2.93	1.994	2.361	0.048	0.221	Not
LUCAT1	1.266	6	2.552	0.036	0.191	Not
HCG25	1.488	5.379	2.457	0.042	0.208	Not
KDM4A-AS1	1.981	6.058	2.527	0.038	0.195	Not
MAGI1-IT1	0.459	10.543	3.224	0.013	0.103	Not
LINC01352	-2.605	1.859	-2.349	0.049	0.224	Not
LINC02274	-2.898	1.964	-2.348	0.049	0.224	Not
LINC01733	3.353	2.232	2.348	0.049	0.224	Not
DHCR24-DT	1.509	5.016	2.406	0.045	0.215	Not
LINC02217	2.418	2.637	2.342	0.05	0.225	Not
CAVIN2-AS1	2.021	2.019	2.341	0.05	0.225	Not
BACH1-IT3	0.774	7.674	2.798	0.025	0.151	Not
LINC00092	-2.808	1.921	-2.333	0.05	0.226	Not
LINC01572	0.685	7.397	2.76	0.027	0.156	Not
ZNF628-DT	-3.058	2.043	-2.331	0.051	0.226	Not
ZNF225-AS1	1.248	6.007	2.533	0.037	0.194	Not
LINC01443	-2.721	1.882	-2.325	0.051	0.227	Not
PIN1-DT	2.731	3.775	2.326	0.051	0.227	Not
PTPRS-AS1	-2.459	1.779	-2.318	0.052	0.227	Not
LINC02916	-0.877	7.916	-2.811	0.025	0.151	Not
CHKA-DT	-1.279	6.872	-2.641	0.032	0.175	Not
LINC01524	-1.503	4.303	-2.322	0.051	0.227	Not
LINC02895	2.758	1.912	2.308	0.052	0.229	Not
ZNF528-AS1	2.854	1.978	2.308	0.052	0.229	Not
LIVAR	-3.039	2.08	-2.307	0.052	0.229	Not
MAST4-IT1	1.102	6.927	2.666	0.031	0.169	Not
WDR7-OT1	-2.976	2.047	-2.304	0.053	0.23	Not
ITFG2-AS1	2.12	5.476	2.405	0.045	0.215	Not
PLS1-AS1	2.934	2.023	2.295	0.053	0.23	Not
SWINGN	-3.39	2.256	-2.3	0.053	0.23	Not
LINC00648	-2.013	6.096	-2.464	0.041	0.206	Not
MGC16275	1.899	5.916	2.464	0.041	0.206	Not
RAMP2-AS1	-1.947	1.515	-2.292	0.054	0.231	Not
LINC02387	-3.148	2.136	-2.293	0.054	0.231	Not
LINC01269	-2.831	1.974	-2.287	0.054	0.232	Not
ICMT-DT	2.484	4.824	2.323	0.051	0.227	Not
PTCSC2	-1.23	5.596	-2.425	0.044	0.213	Not
LINC02795	-2.691	3.334	-2.289	0.054	0.231	Not
BHLHE40-AS1	1.256	6.226	2.533	0.037	0.194	Not
IL21-AS1	2.701	1.885	2.283	0.054	0.232	Not
ATP11B-DT	2.741	1.916	2.282	0.054	0.232	Not
SCAT8	0.975	6.346	2.558	0.036	0.19	Not
HLX-AS1	2.891	1.977	2.278	0.055	0.233	Not
ASH1L-AS1	0.61	8.847	2.918	0.021	0.136	Not
HIVEP2-DT	1.046	5.843	2.47	0.041	0.205	Not
PHKA2-AS1	-2.872	1.984	-2.269	0.056	0.234	Not
DPP4-DT	2.624	1.847	2.26	0.056	0.234	Not
LINCADL	2.801	4.6	2.282	0.054	0.232	Not
SREBF2-AS1	-0.788	8.15	-2.802	0.025	0.151	Not
DLG3-AS1	2.626	3.263	2.257	0.057	0.234	Not
LINC01722	2.67	1.869	2.255	0.057	0.234	Not
HELZ-AS1	-2.448	3.928	-2.261	0.056	0.234	Not
LINC01707	-2.87	1.995	-2.254	0.057	0.234	Not
SPATA3-AS1	-2.87	1.995	-2.254	0.057	0.234	Not
CLIP1-AS1	-3.204	2.157	-2.256	0.057	0.234	Not
LINC02922	-2.397	4.645	-2.275	0.055	0.233	Not
GRK5-IT1	0.681	8.276	2.821	0.024	0.149	Not
CYP4A22-AS1	-1.879	6.323	-2.475	0.041	0.205	Not
LINC02560	-2.844	1.986	-2.251	0.057	0.234	Not
LINC01989	-1.296	5.481	-2.377	0.047	0.219	Not
MAP7-AS1	-3.654	2.38	-2.259	0.056	0.234	Not
LINC02341	2.747	1.921	2.243	0.058	0.236	Not
LINC02067	-2.929	2.031	-2.245	0.058	0.236	Not
LINC02912	2.612	1.842	2.239	0.058	0.237	Not
PCBP2-OT1	0.456	10.426	3.125	0.016	0.113	Not
THBS3-AS1	-0.536	7.995	-2.768	0.026	0.156	Not
SZT2-AS1	-4.027	4.023	-2.256	0.057	0.234	Not
TSPEAR-AS2	-2.714	1.879	-2.233	0.059	0.238	Not
MUC5B-AS1	2.597	1.841	2.225	0.059	0.241	Not
LINC01622	-2.476	1.767	-2.223	0.059	0.241	Not
CPB2-AS1	1.864	2.934	2.222	0.06	0.241	Not
LINC02851	2.553	1.815	2.221	0.06	0.241	Not
PRKD3-DT	-2.747	1.919	-2.213	0.06	0.242	Not
SPRY4-AS1	2.513	3.353	2.213	0.06	0.242	Not
TARID	-1.006	6.001	-2.434	0.043	0.212	Not
MAN2A1-DT	2.558	3.41	2.211	0.061	0.242	Not
LINC00900	-2.567	1.835	-2.206	0.061	0.243	Not
HAR1A	-2.525	1.813	-2.202	0.061	0.243	Not
DDR1-DT	3.086	2.103	2.204	0.061	0.243	Not
RWDD3-DT	1.91	1.91	2.2	0.062	0.243	Not
LINC01203	-2.613	1.862	-2.201	0.062	0.243	Not
EBLN3P	-0.387	10.986	-3.181	0.014	0.107	Not
LINC01260	-3.995	2.492	-2.216	0.06	0.242	Not
ZNF652-AS1	1.341	5.457	2.34	0.05	0.225	Not
LINC00578	2.451	1.764	2.188	0.063	0.246	Not
LINC02846	-1.444	6.094	-2.411	0.045	0.215	Not
LINC01423	-2.979	2.032	-2.192	0.062	0.245	Not
LINC01139	-0.692	8.159	-2.754	0.027	0.156	Not
SEMA3B-AS1	-3.141	2.083	-2.188	0.063	0.246	Not
HERPUD2-AS1	0.426	11.861	3.323	0.012	0.096	Not
LINC00921	-0.469	10.008	-3.017	0.018	0.123	Not
MIR1915HG	-0.563	10.374	-3.07	0.017	0.117	Not
LINC02156	-2.574	3.313	-2.184	0.063	0.247	Not
LINC01885	-2.724	5.766	-2.296	0.053	0.23	Not
LINC02604	-0.486	11.502	-3.25	0.013	0.101	Not
KIF1C-AS1	-2.415	1.755	-2.172	0.064	0.25	Not
GOLGA4-AS1	-1.343	8.844	-2.827	0.024	0.149	Not
DENND6A-DT	1.144	6.555	2.502	0.039	0.2	Not
KCTD13-DT	0.657	9.639	2.952	0.02	0.132	Not
LINC02942	-1.43	4.745	-2.221	0.06	0.241	Not
LINC02035	0.433	11.591	3.259	0.013	0.101	Not
KANSL1L-AS1	-2.399	7.29	-2.539	0.037	0.193	Not
DEPTOR-AS1	2.919	4.791	2.2	0.062	0.243	Not
CTNNA1-AS1	-2.378	1.723	-2.154	0.066	0.255	Not
TIPARP-AS1	0.996	5.536	2.329	0.051	0.227	Not
FLVCR2-AS1	2.354	1.717	2.147	0.067	0.256	Not
LINC00685	0.929	6.558	2.496	0.039	0.201	Not
LINC01842	-2.502	5.343	-2.238	0.058	0.237	Not
ZBED5-AS1	1.238	6.898	2.542	0.037	0.193	Not
LINC02398	-1.318	5.303	-2.269	0.056	0.234	Not
RASGRF2-AS1	-2.308	1.69	-2.143	0.067	0.257	Not
LNCATV	1.673	3.995	2.156	0.066	0.254	Not
LINC00570	-2.721	2.674	-2.151	0.066	0.255	Not
ARHGAP29-AS1	2.252	4.108	2.154	0.066	0.255	Not
LINC01357	-2.274	4.249	-2.156	0.066	0.254	Not
FAM98A	-2.396	1.746	-2.136	0.068	0.258	Not
PORCN-DT	1.18	7.012	2.552	0.036	0.191	Not
LINC00598	1.469	4.198	2.156	0.066	0.254	Not
MAST4-AS1	2.257	4.5	2.168	0.065	0.252	Not
LINC01069	-2.296	1.684	-2.125	0.069	0.259	Not
GABPB1-IT1	0.271	12.185	3.342	0.011	0.094	Not
RNFT1-DT	2.215	3.975	2.131	0.068	0.259	Not
CYTOR	-0.442	9.19	-2.854	0.023	0.146	Not
BRWD1-AS1	1.928	3.876	2.127	0.069	0.259	Not
IDH1-AS1	2.831	4.355	2.138	0.068	0.258	Not
LINC01235	2.196	3.661	2.12	0.07	0.26	Not
RCC2-AS1	-2.299	1.695	-2.111	0.07	0.261	Not
LINC01729	-2.252	1.663	-2.111	0.071	0.261	Not
LINC01820	2.295	1.689	2.109	0.071	0.261	Not
SRP14-DT	-0.661	7.481	-2.606	0.033	0.181	Not
DUBR	0.787	8.401	2.736	0.028	0.158	Not
SGSM2-AS1	1.32	4.893	2.2	0.062	0.243	Not
WAKMAR2	-2.105	3.924	-2.121	0.069	0.26	Not
DAP-DT	-2.697	2.927	-2.116	0.07	0.26	Not
LINC02029	0.85	6.07	2.379	0.047	0.219	Not
MNX1-AS1	-2.9	3.542	-2.116	0.07	0.26	Not
DEPDC1-AS1	1.269	6.547	2.447	0.042	0.21	Not
FLVCR1-DT	0.818	7.52	2.605	0.033	0.181	Not
SLC9A3-AS1	1.032	5.724	2.314	0.052	0.228	Not
LINC01602	-2.407	1.737	-2.095	0.072	0.265	Not
HOXA10-AS	-0.991	6.386	-2.41	0.045	0.215	Not
MSC-AS1	-1.277	6.046	-2.339	0.05	0.225	Not
PLBD1-AS1	1.271	6.459	2.426	0.044	0.213	Not
UBAC2-AS1	0.993	6.303	2.402	0.045	0.215	Not
LINC02982	-2.657	1.869	-2.083	0.074	0.268	Not
NDST1-AS1	-2.657	1.869	-2.083	0.074	0.268	Not
NDUFV2-AS1	0.847	6.514	2.44	0.043	0.211	Not
SYNPO2L-AS1	2.344	1.712	2.072	0.075	0.27	Not
LINC01697	2.21	1.647	2.071	0.075	0.27	Not
NUP93-DT	2.564	5.294	2.181	0.063	0.248	Not
SNHG12	0.468	9.241	2.83	0.024	0.149	Not
LINC02612	-2.344	1.714	-2.068	0.075	0.27	Not
MAP3K4-AS1	0.544	9.056	2.801	0.025	0.151	Not
LINC00865	-2.21	1.643	-2.063	0.076	0.27	Not
CASC2	-0.55	8.325	-2.692	0.029	0.166	Not
LUARIS	2.131	3.26	2.067	0.075	0.27	Not
LINC01198	1.774	2.19	2.056	0.077	0.271	Not
THRB-AS1	1.353	4.256	2.095	0.072	0.265	Not
LINC00992	-2.284	1.685	-2.056	0.077	0.271	Not
LINC02481	0.861	8.6	2.726	0.028	0.16	Not
LINC01882	2.233	1.659	2.052	0.077	0.272	Not
GEMIN7-AS1	0.877	5.893	2.313	0.052	0.228	Not
TSPAN5-DT	2.05	6.814	2.422	0.044	0.213	Not
REL-DT	-2.877	1.976	-2.056	0.077	0.271	Not
VPS13A-AS1	-2.466	3.346	-2.063	0.076	0.27	Not
SCARNA9	1.651	2.042	2.043	0.078	0.273	Not
FHIP1A-DT	0.838	5.842	2.302	0.053	0.23	Not
LINC00467	0.943	6.355	2.388	0.046	0.217	Not
ELDR	-2.22	1.648	-2.043	0.078	0.273	Not
LINC00907	1.729	3.375	2.046	0.078	0.273	Not
RTCA-AS1	1.946	8.689	2.705	0.029	0.164	Not
LINC01089	-0.917	6.693	-2.426	0.044	0.213	Not
LINC01990	-2.172	1.624	-2.036	0.079	0.274	Not
AP1G2-AS1	-0.458	10.766	-3.033	0.018	0.121	Not
ICAM4-AS1	-2.811	5.758	-2.177	0.064	0.249	Not
DYNLL2-DT	-2.325	4.557	-2.076	0.074	0.269	Not
LIPE-AS1	1.022	5.416	2.213	0.06	0.242	Not
HCCS-DT	-0.581	7.93	-2.612	0.033	0.18	Not
CDYL-AS1	-2.124	1.606	-2.024	0.08	0.278	Not
LINC02502	-2.151	1.619	-2.022	0.081	0.279	Not
MAPT-IT1	2.535	5.449	2.159	0.066	0.254	Not
NAV2-AS3	-2.138	1.608	-2.017	0.081	0.28	Not
FLJ12825	0.904	6.408	2.373	0.047	0.219	Not
LINC01762	1.955	2.927	2.01	0.082	0.282	Not
LINC02925	-2.68	5.678	-2.151	0.066	0.255	Not
SIPA1L1-AS1	-1.105	5.662	-2.219	0.06	0.241	Not
ATP2C2-AS1	0.474	10.575	2.981	0.019	0.128	Not
DNAAF4-CCPG1	4.778	2.899	2.056	0.077	0.271	Not
TRIM7-AS1	1.415	4.8	2.092	0.073	0.265	Not
UXT-AS1	-1.151	6.064	-2.272	0.055	0.233	Not
LINC01505	1.674	2.482	1.982	0.086	0.289	Not
LINC02141	-2.367	1.719	-1.987	0.085	0.289	Not
PMM2	-0.524	8.147	-2.612	0.033	0.18	Not
LINC01806	-3.144	6.828	-2.265	0.056	0.234	Not
DDX19A-DT	1.176	5.457	2.173	0.064	0.25	Not
PLCB1-IT1	-1.515	4.995	-2.088	0.073	0.267	Not
STARD13-IT1	0.811	5.883	2.252	0.057	0.234	Not
LINC01780	2.403	1.746	1.969	0.087	0.292	Not
SAMD4A-AS1	2.246	3.699	1.984	0.085	0.289	Not
MED8-AS1	2.413	1.746	1.967	0.088	0.293	Not
FMNL1-AS1	0.63	8.163	2.603	0.034	0.181	Not
RBFADN	2.323	5.015	2.071	0.075	0.27	Not
EXTL3-AS1	0.88	8.639	2.666	0.031	0.169	Not
LINC00211	-2.277	4.829	-2.037	0.079	0.274	Not
DYNLRB2-AS1	-2.308	1.703	-1.962	0.088	0.294	Not
LINC02556	1.626	4.73	2.048	0.078	0.273	Not
EIF2B5-DT	-2.152	4.139	-1.981	0.086	0.289	Not
NDUFAF6	-1.108	6.83	-2.378	0.047	0.219	Not
LINC02101	-2.178	1.635	-1.947	0.09	0.299	Not
DST-AS1	1.668	5.238	2.098	0.072	0.265	Not
ITPR2-AS1	2.17	4.619	2.011	0.082	0.282	Not
RSPH1-DT	-2.121	1.606	-1.937	0.092	0.301	Not
LINC01250	-1.946	1.517	-1.935	0.092	0.301	Not
GK-IT1	1.393	5.826	2.197	0.062	0.244	Not
DDX39B-AS1	1.993	3.499	1.943	0.091	0.3	Not
LINC00461	2.284	1.957	1.921	0.094	0.304	Not
MIR4280HG	-2.106	3.737	-1.945	0.091	0.3	Not
LINC01165	2.538	3.547	1.941	0.091	0.3	Not
FAM182B	1.127	4.932	2.052	0.077	0.272	Not
ODC1-DT	0.573	7.699	2.508	0.039	0.199	Not
LINC01675	-2.025	1.555	-1.917	0.094	0.304	Not
MIR133A1HG	-2.025	1.555	-1.917	0.094	0.304	Not
LINC01655	-2.024	1.555	-1.916	0.095	0.305	Not
TNS2-AS1	-0.875	6.447	-2.295	0.053	0.23	Not
TFAP2E-AS1	1.309	4.905	2.041	0.078	0.273	Not
HCG11	-0.553	13.326	-3.421	0.01	0.089	Not
SEC24B-AS1	1.236	5.211	2.081	0.074	0.268	Not
AQP5-AS1	-2.097	4.254	-1.948	0.09	0.299	Not
EFCAB13-DT	1.641	4.442	1.974	0.087	0.291	Not
LINC02521	2.002	1.545	1.903	0.096	0.308	Not
HOTAIR	-0.803	7.539	-2.465	0.041	0.206	Not
LINC01772	-0.386	10.379	-2.882	0.022	0.142	Not
PITRM1-AS1	-1.417	7.144	-2.38	0.047	0.219	Not
PPM1J-DT	-1.245	5.745	-2.143	0.067	0.257	Not
ARHGAP28-AS1	2.754	4.864	1.983	0.086	0.289	Not
LINC01271	-1.004	6.601	-2.302	0.053	0.23	Not
CCDC144NL-AS1	-1.981	3.481	-1.912	0.095	0.306	Not
MIR130AHG	-3.09	3.836	-1.935	0.092	0.301	Not
TEDC2-AS1	-2.793	6.214	-2.125	0.069	0.259	Not
LINC01902	-2.352	2.498	-1.904	0.096	0.308	Not
APTR	0.553	7.371	2.442	0.043	0.211	Not
ACTN1-DT	1.088	7.298	2.419	0.044	0.213	Not
LINC02057	-1.837	3.405	-1.899	0.097	0.309	Not
LINC02323	4.151	2.609	1.936	0.092	0.301	Not
LINC02211	-1.415	3.903	-1.908	0.096	0.307	Not
DIO3OS	-1.794	3.307	-1.894	0.098	0.31	Not
TOX-DT	0.881	6.296	2.258	0.056	0.234	Not
SCG3	1.46	6.946	2.35	0.049	0.224	Not
SEC24C	0.401	10.847	2.939	0.02	0.133	Not
MIR497HG	-3.445	3.916	-1.925	0.093	0.303	Not
FOXCUT	2.695	2.285	1.881	0.1	0.315	Not
KLHL7-DT	0.578	8.137	2.536	0.037	0.194	Not
DNAJB5-DT	0.805	5.76	2.148	0.067	0.256	Not
STARD7-AS1	1.286	6.696	2.298	0.053	0.23	Not
AFF4-DT	-1.178	6.623	-2.271	0.055	0.233	Not
STAT4-AS1	1.899	1.581	1.855	0.104	0.322	Not
MYCBP2-AS1	1.809	2.309	1.849	0.105	0.324	Not
LINC02532	-2.085	2.366	-1.86	0.103	0.321	Not
ZFAND3-DT	0.924	5.449	2.078	0.074	0.268	Not
INO80-AS1	1.892	1.489	1.846	0.105	0.325	Not
C1orf220	-0.981	7.557	-2.423	0.044	0.213	Not
CCDC15-DT	-2.026	4.024	-1.877	0.1	0.316	Not
MKX-AS1	-1.902	3.504	-1.86	0.103	0.321	Not
RNPC3-DT	1.647	3.825	1.865	0.102	0.319	Not
RNF139-DT	0.506	8.71	2.594	0.034	0.182	Not
LINC00642	1.807	1.445	1.838	0.106	0.327	Not
ENO1-AS1	0.816	7.948	2.479	0.04	0.204	Not
LINC02936	2.368	5.544	2.023	0.081	0.278	Not
SNX30-DT	0.79	8.003	2.486	0.04	0.203	Not
GNAO1-DT	2.28	2.081	1.817	0.11	0.334	Not
LINC02256	1.863	3.111	1.82	0.109	0.333	Not
PEF1-AS1	1.516	2.173	1.802	0.112	0.338	Not
ADD3-AS1	-2.23	4.373	-1.868	0.102	0.319	Not
CYP1B1-AS1	1.059	4.615	1.92	0.094	0.304	Not
LRIG3-DT	2.543	2.239	1.816	0.11	0.334	Not
TMEM246-AS1	2.178	1.954	1.804	0.112	0.338	Not
HK2-DT	-0.446	9.724	-2.717	0.028	0.161	Not
LINC01031	1.062	4.934	1.958	0.089	0.295	Not
LINC01484	-2.227	4.862	-1.907	0.096	0.307	Not
CNIH3-AS2	-2.043	1.564	-1.803	0.112	0.338	Not
TTC14-DT	-1.452	1.269	-1.806	0.112	0.337	Not
LINC00517	-2.265	3.09	-1.823	0.109	0.333	Not
TAGAP-AS1	1.029	5.02	1.969	0.087	0.292	Not
LINC02166	1.107	7.078	2.325	0.051	0.227	Not
KLRK1-AS1	-1.097	5.714	-2.065	0.076	0.27	Not
LINC02104	-0.86	6.837	-2.273	0.055	0.233	Not
LINC02243	-1.957	1.521	-1.789	0.114	0.342	Not
VPS33B-DT	-1.161	4.515	-1.88	0.1	0.315	Not
LINC00551	1.69	2.817	1.781	0.116	0.346	Not
LINC01123	-4.079	7.303	-2.132	0.068	0.259	Not
MESTIT1	-2.844	5.191	-1.902	0.097	0.308	Not
SLC12A9-AS1	1.412	5.273	1.981	0.086	0.289	Not
FAM182A	0.887	5.303	1.993	0.084	0.287	Not
DISC1-IT1	-1.127	4.984	-1.927	0.093	0.303	Not
LINC02868	-1.857	1.471	-1.767	0.118	0.35	Not
RNASEH2B-AS1	-1.91	3.084	-1.773	0.117	0.348	Not
ZBTB40-IT1	0.645	7.616	2.381	0.047	0.219	Not
FRY-AS1	2.303	2.111	1.751	0.121	0.355	Not
LINC00649	0.964	4.934	1.917	0.094	0.304	Not
TMCO1-AS1	0.553	8.714	2.534	0.037	0.194	Not
LINC02725	-1.706	2.837	-1.756	0.12	0.353	Not
GHRLOS	-0.799	7.349	-2.323	0.051	0.227	Not
SNHG20	0.752	7.627	2.366	0.048	0.221	Not
HCG17	2.098	2.013	1.726	0.126	0.364	Not
LINC01634	-2.568	5.917	-1.972	0.087	0.292	Not
STEAP3-AS1	2.52	2.344	1.739	0.123	0.36	Not
LINC00342	-3.053	7.091	-2.137	0.068	0.258	Not
SEMA6A-AS1	-1.958	1.523	-1.73	0.125	0.363	Not
GLIS2-AS1	1.873	3.159	1.734	0.124	0.362	Not
GHET1	1.488	7.062	2.256	0.057	0.234	Not
NCK1-DT	0.63	7.473	2.338	0.05	0.225	Not
HCG20	1.158	5.804	2.041	0.078	0.273	Not
COLCA1	-1.989	4.272	-1.78	0.116	0.346	Not
CPS1-IT1	-1.245	7.072	-2.247	0.057	0.235	Not
POU2F1-DT	1.529	7.528	2.321	0.051	0.227	Not
LINC00881	-0.908	5.298	-1.932	0.092	0.301	Not
LINC02762	0.831	6.723	2.207	0.061	0.242	Not
LINC01783	3.487	4.839	1.789	0.114	0.342	Not
FLJ13224	0.986	7.403	2.309	0.052	0.229	Not
NQO2-AS1	1.081	5.282	1.93	0.093	0.302	Not
LINC00960	0.467	8.003	2.398	0.046	0.216	Not
SOCAR	2.34	3.597	1.725	0.126	0.364	Not
CPNE2-DT	1.305	4.585	1.816	0.11	0.334	Not
VPS39-DT	2.201	4.405	1.775	0.117	0.347	Not
LINC01956	2.165	3.893	1.732	0.125	0.363	Not
MINCR	-0.543	8.135	-2.407	0.045	0.215	Not
LINC02086	-1.783	3.736	-1.717	0.127	0.366	Not
MAGEA6-DT	-0.544	8.7	-2.483	0.04	0.203	Not
SMG7-AS1	2.388	3.725	1.714	0.128	0.367	Not
PPP4R1-AS1	1.887	3.957	1.717	0.127	0.366	Not
CD63-AS1	-0.384	9.5	-2.595	0.034	0.182	Not
ADCY6-DT	-1.666	3.353	-1.691	0.132	0.374	Not
LINC02235	2.039	1.996	1.665	0.138	0.382	Not
LINC00654	1.525	3.406	1.676	0.135	0.378	Not
HOXC-AS2	1.522	1.306	1.672	0.136	0.379	Not
LINC00596	-1.26	5.883	-1.991	0.085	0.287	Not
TIAM1-AS1	2.392	4.891	1.797	0.113	0.34	Not
TMC3-AS1	-1.94	1.51	-1.663	0.138	0.382	Not
CT62	2.328	5.313	1.855	0.104	0.322	Not
LINC03016	1.596	4.021	1.711	0.128	0.368	Not
DLX6-AS1	-0.744	6.433	-2.112	0.07	0.261	Not
MINDY2-DT	0.471	8.818	2.484	0.04	0.203	Not
WASL-DT	0.386	10.288	2.703	0.029	0.164	Not
LRP4-AS1	1.983	4.59	1.765	0.118	0.35	Not
LINC02068	1.879	4.193	1.718	0.127	0.366	Not
LAMTOR5-AS1	-0.994	5.072	-1.846	0.105	0.325	Not
STK24-AS1	-0.841	7.838	-2.331	0.051	0.226	Not
LINC02389	-2.029	1.557	-1.645	0.142	0.389	Not
PELATON	-1.11	4.645	-1.775	0.117	0.347	Not
USP34-DT	1.094	6.648	2.142	0.067	0.257	Not
GPR155-DT	-1.934	4.391	-1.721	0.126	0.365	Not
LINC02447	1.207	6.283	2.069	0.075	0.27	Not
TMPO-AS1	0.379	10.727	2.761	0.027	0.156	Not
LINC01731	1.906	1.91	1.629	0.145	0.396	Not
NEK2-DT	1.821	1.812	1.629	0.145	0.396	Not
ZBED3-AS1	-0.693	7.153	-2.221	0.06	0.241	Not
DIAPH2-AS1	1.51	1.295	1.636	0.143	0.392	Not
HLCS-AS1	0.37	9.625	2.586	0.034	0.184	Not
FAM169A-AS1	-1.998	4.222	-1.692	0.132	0.374	Not
LINC03008	-1.909	4.267	-1.697	0.131	0.372	Not
LINC01895	-0.881	5.308	-1.872	0.101	0.318	Not
LINC00852	1.401	8.754	2.445	0.043	0.21	Not
KDSR-DT	0.783	6.456	2.105	0.071	0.262	Not
EP300-AS1	2.091	3.362	1.645	0.142	0.389	Not
DUSP5-DT	0.608	6.757	2.159	0.066	0.254	Not
LINC01880	-1.492	1.287	-1.627	0.145	0.396	Not
INTS6-AS1	1.016	5.392	1.888	0.099	0.313	Not
BCL10-AS1	0.882	6.174	2.043	0.078	0.273	Not
SUCLG2-DT	-1.215	7.257	-2.208	0.061	0.242	Not
LMNB1-DT	0.757	5.993	2.005	0.083	0.283	Not
LINC00240	0.869	5.179	1.845	0.105	0.325	Not
PCBP1-AS1	-0.741	5.7	-1.934	0.092	0.301	Not
PRKCZ-DT	-1.803	2.611	-1.611	0.149	0.402	Not
UCHL1-DT	-1.522	1.3	-1.609	0.149	0.402	Not
ITGA9-AS1	-1.015	4.651	-1.743	0.123	0.359	Not
INKA2-AS1	-1.632	3.529	-1.626	0.146	0.396	Not
HDAC4-AS1	1.483	4.375	1.703	0.13	0.37	Not
TP53RK-DT	1.603	5.886	1.942	0.091	0.3	Not
LINC01934	1.203	4.267	1.688	0.133	0.375	Not
LINC02809	0.42	8.348	2.377	0.047	0.219	Not
FAM135A-AS1	-1.957	4.031	-1.641	0.142	0.39	Not
SOD2-OT1	2.872	6.885	2.032	0.079	0.275	Not
JMJD1C-AS1	0.852	7.465	2.238	0.058	0.237	Not
CALML3-AS1	-2.352	5.249	-1.766	0.118	0.35	Not
KCNK15-AS1	-0.981	5.339	-1.839	0.106	0.327	Not
ARHGEF18-AS1	-2.152	3.117	-1.609	0.149	0.402	Not
FAM138B	1.842	1.882	1.568	0.159	0.417	Not
LNCSRLR	0.647	8.421	2.372	0.048	0.219	Not
HCG9	1.576	4.922	1.756	0.12	0.353	Not
LINC00311	-2.186	1.632	-1.574	0.157	0.415	Not
LINC01134	0.863	6.623	2.091	0.073	0.265	Not
LINC00940	-1.652	1.37	-1.57	0.158	0.416	Not
LINC00326	1.851	1.941	1.554	0.162	0.422	Not
FALEC	2.087	4.884	1.727	0.125	0.364	Not
HOXA-AS3	1.297	5.562	1.867	0.102	0.319	Not
LINC01340	-1.6	1.338	-1.564	0.159	0.418	Not
LINC01151	-1.754	2.189	-1.556	0.161	0.421	Not
GORAB-AS1	-1.737	3.693	-1.59	0.154	0.409	Not
RPAP3-DT	0.678	6.216	2.01	0.082	0.282	Not
OXR1-AS1	1.777	1.849	1.542	0.165	0.426	Not
LUNAR1	-1.186	4.417	-1.661	0.138	0.383	Not
LINC02298	-1.14	5.016	-1.751	0.121	0.355	Not
LINC01847	-0.414	9.445	-2.501	0.039	0.2	Not
PTOV1-AS1	-0.784	7.781	-2.251	0.057	0.234	Not
FAM83A-AS1	1.174	4.172	1.627	0.145	0.396	Not
LINC00944	0.908	4.907	1.74	0.123	0.36	Not
R3HDM2-DT	0.879	6.289	2.008	0.082	0.283	Not
SH3TC2-DT	0.834	5.262	1.804	0.112	0.338	Not
LINC02569	-2.267	4.847	-1.677	0.135	0.378	Not
LINC01833	-1.782	4.01	-1.589	0.154	0.409	Not
IL10RB-DT	2.823	2.847	1.568	0.159	0.417	Not
BICD1-AS1	2.5	2.661	1.548	0.163	0.424	Not
FAM138C	1.534	1.565	1.526	0.168	0.432	Not
YPEL3-DT	-0.875	6.866	-2.093	0.072	0.265	Not
LINC03014	-1.32	5.314	-1.776	0.117	0.347	Not
MIR3677HG	0.749	5.781	1.9	0.097	0.309	Not
LINC01752	-1.642	3.593	-1.548	0.163	0.424	Not
HOXA-AS2	0.748	7.095	2.136	0.068	0.258	Not
LINC02640	-1.476	1.276	-1.521	0.17	0.435	Not
CDC42-AS1	-1.456	1.27	-1.506	0.173	0.44	Not
SDCBP2-AS1	0.52	7.083	2.126	0.069	0.259	Not
LINC01693	-1.212	3.877	-1.544	0.164	0.425	Not
TMEM184C-DT	2.496	2.66	1.512	0.172	0.438	Not
DYM-AS1	1.533	1.63	1.483	0.179	0.45	Not
STIM2-AS1	1.697	4.249	1.582	0.155	0.412	Not
INO80D-AS2	-0.533	8.192	-2.279	0.055	0.233	Not
MIOS-DT	-1.349	6.298	-1.934	0.092	0.301	Not
LINC00327	1.456	2.7	1.469	0.183	0.455	Not
ATF6-DT	-2.071	4.682	-1.619	0.147	0.398	Not
MANEA-DT	0.597	8.983	2.393	0.046	0.217	Not
LMNTD2-AS1	-2.292	4.982	-1.649	0.141	0.388	Not
ZBTB46-AS2	-1.59	1.332	-1.483	0.179	0.45	Not
H3-3A-DT	0.844	6.472	2.001	0.083	0.284	Not
ZNF236-DT	1.318	5.696	1.831	0.107	0.33	Not
LINC00574	2.143	5.259	1.709	0.129	0.369	Not
LINC00471	-0.701	6.863	-2.062	0.076	0.27	Not
LINC02456	2.384	5.057	1.665	0.137	0.382	Not
MIR2052HG	1.423	3.618	1.499	0.175	0.443	Not
SLC25A25-AS1	-1.628	11.54	-2.757	0.027	0.156	Not
SOCS3-DT	-1.821	2.87	-1.488	0.178	0.449	Not
B4GALT1-AS1	0.728	6.062	1.919	0.094	0.304	Not
LINC00365	1.743	2.671	1.458	0.186	0.458	Not
ATP1A1-AS1	0.786	7.1	2.102	0.071	0.263	Not
TCL6	2.083	2.359	1.458	0.186	0.458	Not
TICAM2-AS1	-1.525	3.192	-1.477	0.181	0.452	Not
SCN1A-AS1	-1.34	1.217	-1.465	0.184	0.456	Not
CCNT2-AS1	1.546	6.09	1.875	0.101	0.317	Not
TRIM52-AS1	0.74	5.417	1.769	0.118	0.35	Not
SLC41A3-AS1	1.691	4.104	1.523	0.169	0.434	Not
TMEM51-AS1	-1.629	3.85	-1.492	0.177	0.447	Not
LINC02739	1.926	4.045	1.51	0.172	0.438	Not
SYT9-AS1	-1.752	4.148	-1.516	0.171	0.437	Not
MAST3-AS1	1.791	3.726	1.473	0.182	0.453	Not
LINC00840	-1.482	1.287	-1.44	0.191	0.466	Not
MIR100HG	-0.513	7.959	-2.208	0.061	0.242	Not
RABGAP1L-AS1	1.296	3.801	1.475	0.181	0.453	Not
DHX9-AS1	0.516	7.597	2.157	0.066	0.254	Not
FABP6-AS1	-1.305	1.195	-1.438	0.191	0.467	Not
ECE1-AS1	-1.646	4.195	-1.511	0.172	0.438	Not
USP3-AS1	0.895	7.345	2.112	0.07	0.261	Not
NEUROG2-AS1	-2.419	2.689	-1.463	0.185	0.457	Not
MEG8	-1.367	2.666	-1.414	0.198	0.477	Not
EPS15-AS1	-1.559	3.926	-1.473	0.182	0.453	Not
LINC00886	-0.976	5.985	-1.839	0.106	0.327	Not
YAE1-DT	1.911	2.263	1.401	0.202	0.485	Not
MYCBP2-AS2	1.223	6.415	1.932	0.092	0.301	Not
PRDM6-AS1	-0.697	7.226	-2.082	0.074	0.268	Not
LINC01822	-1.758	2.859	-1.425	0.195	0.473	Not
DGCR5	-1.584	3.554	-1.44	0.191	0.466	Not
GRIK4	0.306	11.103	2.67	0.03	0.169	Not
HILPDA-AS1	0.809	6.441	1.943	0.091	0.3	Not
REPIN1-AS1	-1.705	3.753	-1.446	0.189	0.464	Not
C2CD5-AS1	1.301	4.225	1.505	0.174	0.44	Not
SNRPA1-DT	-0.597	7.53	-2.122	0.069	0.26	Not
ASMTL-AS1	0.556	7.477	2.119	0.07	0.26	Not
USP38-DT	1.146	6.288	1.896	0.097	0.31	Not
PRKCQ-AS1	-1.219	3.386	-1.411	0.199	0.48	Not
MBNL1-AS1	-0.4	9.577	-2.424	0.044	0.213	Not
LINC01979	2.173	5.351	1.661	0.138	0.383	Not
CT70	0.748	5.841	1.817	0.11	0.334	Not
FAM138F	1.427	1.617	1.384	0.207	0.493	Not
H19	-1.765	4.009	-1.456	0.186	0.459	Not
ITGA2-AS1	1.65	2.635	1.372	0.21	0.496	Not
UQCRFS1-DT	-1.545	4.053	-1.457	0.186	0.459	Not
LINC00499	1.618	3.749	1.422	0.196	0.474	Not
LINC01666	-2.087	5.151	-1.601	0.151	0.406	Not
ATP1B3-AS1	-2.099	2.866	-1.403	0.201	0.484	Not
MTA1-DT	-0.623	7.03	-2.027	0.08	0.277	Not
SCOC-AS1	-1.591	2.528	-1.368	0.211	0.497	Not
SILC1	-1.27	1.178	-1.381	0.207	0.493	Not
FAM138A	1.391	1.6	1.361	0.213	0.5	Not
FCHO2-DT	1.464	7.206	2.037	0.079	0.274	Not
LACTB2-AS1	-1.635	2.615	-1.364	0.213	0.499	Not
WDR5B-DT	0.583	6.672	1.966	0.088	0.293	Not
CYLD-AS1	-0.793	4.989	-1.607	0.15	0.403	Not
LINC02709	-0.807	6.345	-1.881	0.1	0.315	Not
TFAP2A-AS2	0.419	9.847	2.446	0.042	0.21	Not
LINC01518	0.533	6.853	1.995	0.084	0.286	Not
SYNM-AS2	1.112	7.778	2.127	0.069	0.259	Not
RORA-AS1	-1.113	4.404	-1.486	0.179	0.45	Not
SLC25A5-AS1	-2.696	1.866	-1.368	0.211	0.497	Not
LINC01140	1.33	3.378	1.356	0.215	0.502	Not
LINC01220	1.555	3.583	1.374	0.21	0.496	Not
NRAV	-0.82	10.253	-2.49	0.04	0.202	Not
GUSBP11	0.705	6.856	1.983	0.085	0.289	Not
LINC01970	2.972	2.007	1.367	0.212	0.498	Not
IBA57-DT	0.766	6.214	1.86	0.103	0.321	Not
LINC00426	-1.241	1.168	-1.355	0.215	0.502	Not
CDK6-AS1	1.507	1.996	1.319	0.227	0.516	Not
LINC02940	-1.001	5.381	-1.658	0.139	0.384	Not
MIR137HG	-0.454	8.832	-2.277	0.055	0.233	Not
KIRREL3-AS1	-1.438	3.213	-1.348	0.217	0.503	Not
CDC42-IT1	2.286	1.688	1.331	0.223	0.51	Not
CAMTA2-AS1	-2.173	1.624	-1.327	0.224	0.512	Not
EHBP1-AS1	1.208	2.635	1.293	0.235	0.521	Not
PRR34-AS1	-0.428	8.529	-2.225	0.059	0.241	Not
TMEM202-AS1	-0.652	8.964	-2.287	0.054	0.232	Not
RNF217-AS1	-0.738	5.574	-1.695	0.132	0.373	Not
MIF4GD-DT	-0.362	9.282	-2.334	0.05	0.226	Not
LINC01589	-2.125	1.603	-1.319	0.227	0.516	Not
LINC02701	2.15	1.618	1.316	0.228	0.517	Not
LINC02245	0.965	4.993	1.577	0.156	0.414	Not
ZNF277-AS1	1.398	1.834	1.296	0.234	0.521	Not
LINC00942	2.037	5.828	1.7	0.131	0.372	Not
ATP13A3-DT	-0.608	7.96	-2.132	0.068	0.259	Not
LINC02987	0.551	6.85	1.963	0.088	0.294	Not
LINC01290	-1.96	2.461	-1.323	0.225	0.515	Not
ANKRD10-IT1	2.079	1.579	1.308	0.23	0.521	Not
SLC5A4-AS1	-2.081	1.586	-1.309	0.23	0.521	Not
LINC02577	1.901	2.386	1.294	0.235	0.521	Not
DLGAP1-AS3	-1.204	1.148	-1.322	0.225	0.515	Not
TAX1BP1-AS1	-0.697	7.183	-2.005	0.083	0.283	Not
SQLE-DT	-1.809	3.185	-1.331	0.223	0.51	Not
SETD4-AS1	1.884	2.622	1.296	0.234	0.521	Not
TENM2-AS1	-2.436	2.858	-1.351	0.216	0.503	Not
TARS1-DT	-3.088	2.05	-1.35	0.217	0.503	Not
NRIP3-DT	-1.997	1.54	-1.3	0.233	0.521	Not
LINC02798	1.143	3.811	1.353	0.216	0.503	Not
LINC01242	2.026	1.558	1.296	0.234	0.521	Not
LINC00518	1.654	2.13	1.271	0.242	0.521	Not
SEPSECS-AS1	0.543	8.271	2.17	0.064	0.251	Not
ALDH1L1-AS2	1.837	2.355	1.273	0.242	0.521	Not
LINC01703	-1.566	3.887	-1.352	0.216	0.503	Not
HSDL2-AS1	0.863	6.164	1.81	0.111	0.336	Not
LGALS8-AS1	-1.715	4.786	-1.482	0.18	0.451	Not
LINC02751	1.984	1.537	1.289	0.236	0.521	Not
SLCO5A1-AS1	1.976	1.532	1.288	0.236	0.521	Not
KTN1-AS1	-0.434	7.71	-2.08	0.074	0.268	Not
LINC02084	-1.296	5.9	-1.712	0.128	0.368	Not
EIPR1-IT1	-0.656	7.553	-2.051	0.077	0.272	Not
SLC20A1-DT	0.844	6.198	1.814	0.11	0.335	Not
HSD11B1-AS1	-1.894	1.485	-1.285	0.237	0.521	Not
VRK1	0.442	7.596	2.063	0.076	0.27	Not
LINC02055	1.175	2.763	1.25	0.249	0.521	Not
LINC02250	1.926	1.507	1.28	0.239	0.521	Not
ARHGAP22-IT1	-0.992	5.263	-1.587	0.154	0.41	Not
RBM12B-DT	1.781	2.324	1.25	0.249	0.521	Not
MYL6B-AS1	1.21	5.161	1.571	0.158	0.416	Not
FBXO34-AS1	-1.633	2.403	-1.261	0.246	0.521	Not
ANXA2R-AS1	-1.302	7.947	-2.086	0.073	0.267	Not
LINC02036	1.866	1.477	1.269	0.243	0.521	Not
CRNDE	0.428	9.123	2.279	0.055	0.233	Not
SCMH1-DT	-1.654	4.389	-1.392	0.204	0.489	Not
TACC3	-0.634	8.116	-2.122	0.069	0.26	Not
LINC02804	0.829	6.229	1.806	0.112	0.337	Not
LNCRNA-IUR	1.003	4.511	1.438	0.191	0.467	Not
LINC02394	-1.793	1.441	-1.26	0.246	0.521	Not
LINC02817	0.788	6.042	1.764	0.119	0.35	Not
LINC02961	1.804	1.44	1.261	0.246	0.521	Not
LINC03022	1.334	3.349	1.265	0.244	0.521	Not
CARMAL	-1.102	1.098	-1.275	0.241	0.521	Not
LINC01094	-0.679	5.756	-1.689	0.133	0.374	Not
MIR7-3HG	1.298	1.628	1.242	0.252	0.521	Not
PIWIL4-AS1	-1.769	1.43	-1.255	0.248	0.521	Not
C2orf27A	0.336	9.321	2.301	0.053	0.23	Not
LINC00111	-1.732	1.402	-1.254	0.248	0.521	Not
ROCR	1.775	1.425	1.255	0.248	0.521	Not
LINC02037	1.775	1.425	1.255	0.248	0.521	Not
LINC02111	1.775	1.425	1.255	0.248	0.521	Not
LINC01233	1.775	1.425	1.255	0.248	0.521	Not
KC6	-1.488	3.649	-1.293	0.235	0.521	Not
TNK2-AS1	-1.76	1.426	-1.252	0.249	0.521	Not
YEATS2-AS1	0.665	5.663	1.678	0.135	0.378	Not
PCCA-DT	0.41	9.147	2.273	0.055	0.233	Not
LINC02516	-1.781	2.701	-1.26	0.246	0.521	Not
ATP8A1-DT	-1.62	2.163	-1.231	0.256	0.521	Not
BOK-AS1	1.743	1.409	1.248	0.25	0.521	Not
G2E3-AS1	1.743	1.409	1.248	0.25	0.521	Not
LINC02933	0.568	9.465	2.317	0.052	0.228	Not
NDUFV1-DT	-1.472	3.924	-1.308	0.23	0.521	Not
LINC01556	1.739	1.413	1.243	0.252	0.521	Not
C10orf67-AS1	1.739	1.413	1.243	0.252	0.521	Not
P4HA3-AS1	1.739	1.413	1.243	0.252	0.521	Not
LINC01592	-1.679	1.375	-1.242	0.252	0.521	Not
MIR142HG	-1.679	1.375	-1.242	0.252	0.521	Not
LINC00163	-1.325	7.077	-1.918	0.094	0.304	Not
TMX4-AS1	1.125	5.168	1.546	0.164	0.425	Not
ZNF30-AS1	-1.683	1.387	-1.236	0.254	0.521	Not
TMEM139-AS1	0.913	5.179	1.553	0.162	0.422	Not
FAM27E3	-2.104	3.044	-1.274	0.241	0.521	Not
CFAP20DC-DT	-1.644	1.357	-1.234	0.255	0.521	Not
SNRK-AS1	0.754	5.613	1.65	0.14	0.387	Not
LINC01363	1.706	1.399	1.234	0.255	0.521	Not
LINC02810	1.706	1.399	1.234	0.255	0.521	Not
LINC02767	1.706	1.399	1.234	0.255	0.521	Not
LINC00847	-0.708	7.435	-1.995	0.084	0.286	Not
EML4-AS1	-1.657	1.374	-1.23	0.256	0.521	Not
DARS1-AS1	0.775	4.688	1.446	0.189	0.464	Not
DNAJC27-AS1	1.008	4.247	1.36	0.214	0.501	Not
LINC02432	-1.748	2.325	-1.215	0.262	0.521	Not
SMYD3-IT1	1.672	1.382	1.226	0.258	0.521	Not
DCXR-DT	1.647	1.361	1.227	0.258	0.521	Not
TTLL10-AS1	-1.634	1.363	-1.224	0.258	0.521	Not
NPAS2-AS1	-1.634	1.363	-1.224	0.258	0.521	Not
RAB11B-AS1	-0.887	6.901	-1.894	0.098	0.31	Not
CT69	1.267	1.653	1.203	0.266	0.521	Not
LINC01485	1.933	5.297	1.528	0.168	0.432	Not
GLIS3-AS2	1.649	1.368	1.222	0.259	0.521	Not
CALHM6-AS1	1.649	1.368	1.222	0.259	0.521	Not
GREB1L-DT	1.458	3.936	1.291	0.236	0.521	Not
ZNF473CR	-1.617	1.355	-1.219	0.26	0.521	Not
LINC02080	-1.436	3.935	-1.285	0.237	0.521	Not
SLC12A5-AS1	-1.609	1.35	-1.217	0.261	0.521	Not
LINC02289	1.642	1.367	1.219	0.26	0.521	Not
LY86-AS1	1.634	1.361	1.218	0.261	0.521	Not
PKIA-AS1	-1.39	3.589	-1.248	0.25	0.521	Not
LIM2-AS1	-2.328	2.882	-1.258	0.247	0.521	Not
FEZF1-AS1	-1.682	2.737	-1.215	0.261	0.521	Not
GRAMD1A-AS1	-1.225	3.154	-1.214	0.262	0.521	Not
MIR4300HG	1.465	2.512	1.176	0.276	0.521	Not
MIR3659HG	-1.68	2.959	-1.226	0.258	0.521	Not
WNT5A-AS1	-1.451	6.102	-1.689	0.133	0.374	Not
TIMMDC1-DT	-1.841	5.153	-1.478	0.181	0.452	Not
ZNF25-DT	1.613	1.351	1.213	0.262	0.521	Not
CNTFR-AS1	1.613	1.351	1.213	0.262	0.521	Not
LINC01450	1.618	1.355	1.213	0.262	0.521	Not
ADGB-DT	1.618	1.355	1.213	0.262	0.521	Not
AQP4-AS1	-1.58	1.336	-1.21	0.263	0.521	Not
LINC01181	-1.551	1.31	-1.211	0.263	0.521	Not
ZFPM1-AS1	-2.023	4.43	-1.334	0.222	0.509	Not
KIAA2012-AS1	-1.575	1.335	-1.208	0.264	0.521	Not
LINC02600	-1.575	1.335	-1.208	0.264	0.521	Not
DOCK8-AS2	1.153	1.465	1.198	0.268	0.521	Not
LINC01710	1.568	1.321	1.207	0.265	0.521	Not
HMGA1P4	1.568	1.321	1.207	0.265	0.521	Not
LINC00871	1.568	1.321	1.207	0.265	0.521	Not
TOMM20L-DT	-1.549	1.32	-1.202	0.266	0.521	Not
TMEM218	0.602	10.01	2.371	0.048	0.219	Not
CPMER	-1.541	1.318	-1.198	0.268	0.521	Not
SEPTIN4-AS1	-1.541	1.318	-1.198	0.268	0.521	Not
SACS-AS1	2.199	2.904	1.213	0.262	0.521	Not
CYYR1-AS1	1.171	3.417	1.202	0.266	0.521	Not
XACT	-1.884	4.766	-1.391	0.205	0.49	Not
CASC19	-0.906	9.038	-2.212	0.06	0.242	Not
LINC01068	1.497	6.118	1.704	0.13	0.37	Not
OSMR-DT	-2.107	2.781	-1.225	0.258	0.521	Not
DNM3OS	-1.504	1.287	-1.198	0.268	0.521	Not
UBE2E2-DT	-1.504	1.287	-1.198	0.268	0.521	Not
PFKP-DT	-2.144	3.272	-1.243	0.252	0.521	Not
USP6NL-AS1	-1.538	2.764	-1.19	0.271	0.521	Not
HYMAI	2.097	9.906	2.322	0.051	0.227	Not
RPL34-DT	-0.956	4.493	-1.369	0.211	0.497	Not
FAM88E	2.016	2.769	1.187	0.272	0.521	Not
NDP-AS1	-1.511	1.301	-1.191	0.27	0.521	Not
LINC01905	-1.511	1.301	-1.191	0.27	0.521	Not
LINC01050	-1.511	1.301	-1.191	0.27	0.521	Not
ST7-OT4	1.012	2.451	1.133	0.292	0.521	Not
LINC01754	1.511	1.293	1.191	0.27	0.521	Not
LINC01623	1.511	1.293	1.191	0.27	0.521	Not
SRGAP3-AS2	1.511	1.293	1.191	0.27	0.521	Not
LINC01756	1.511	1.293	1.191	0.27	0.521	Not
LINC02181	1.511	1.293	1.191	0.27	0.521	Not
PENK-AS1	1.511	1.293	1.191	0.27	0.521	Not
LINC00609	1.511	1.293	1.191	0.27	0.521	Not
LCMT1-AS2	1.511	1.293	1.191	0.27	0.521	Not
FLJ16779	1.511	1.293	1.191	0.27	0.521	Not
LINC01226	1.511	1.293	1.191	0.27	0.521	Not
KCNQ1OT1	-1.409	4.051	-1.27	0.243	0.521	Not
CASC15	-1.326	2.195	-1.148	0.287	0.521	Not
FLNB-AS1	-2.02	2.736	-1.203	0.266	0.521	Not
TRAPPC12-AS1	1.51	1.301	1.184	0.273	0.521	Not
PROSER2-AS1	1.51	1.301	1.184	0.273	0.521	Not
SPINT1-AS1	-1.453	1.261	-1.183	0.273	0.521	Not
C8orf86	-1.477	1.284	-1.181	0.274	0.521	Not
FLRT2-AS1	-1.477	1.284	-1.181	0.274	0.521	Not
LINC02372	-1.477	1.284	-1.181	0.274	0.521	Not
GPAT4-AS1	-1.477	1.284	-1.181	0.274	0.521	Not
LINC02973	-1.477	1.284	-1.181	0.274	0.521	Not
LINC01205	-1.478	1.286	-1.181	0.274	0.521	Not
DLGAP4-AS1	1.335	2.075	1.135	0.292	0.521	Not
LINC01711	-1.634	4.521	-1.336	0.221	0.508	Not
LINC02465	-1.436	1.252	-1.178	0.275	0.521	Not
LINC02223	-1.436	1.252	-1.178	0.275	0.521	Not
NFATC2IP-AS1	-1.436	1.252	-1.178	0.275	0.521	Not
HAS2-AS1	-0.775	5.815	-1.639	0.143	0.391	Not
LINC02694	1.485	1.287	1.179	0.275	0.521	Not
PCA3	1.485	1.287	1.179	0.275	0.521	Not
LINC00974	1.485	1.287	1.179	0.275	0.521	Not
LINC01563	1.485	1.287	1.179	0.275	0.521	Not
LINC01378	1.485	1.287	1.179	0.275	0.521	Not
LINC01065	1.485	1.287	1.179	0.275	0.521	Not
LINC01808	1.485	1.287	1.179	0.275	0.521	Not
DACT3-AS1	1.485	1.287	1.179	0.275	0.521	Not
LINC02315	1.485	1.287	1.179	0.275	0.521	Not
PCAT14	1.485	1.287	1.179	0.275	0.521	Not
ID2-AS1	1.082	4.845	1.427	0.194	0.472	Not
LINC00923	1.195	3.144	1.15	0.286	0.521	Not
LINC01554	-0.541	6.411	-1.774	0.117	0.347	Not
KMT2E	1.455	1.265	1.175	0.276	0.521	Not
NCF4-AS1	1.455	1.265	1.175	0.276	0.521	Not
LINC01276	1.455	1.265	1.175	0.276	0.521	Not
ASIC4-AS1	1.455	1.265	1.175	0.276	0.521	Not
LIF-AS1	1.455	1.265	1.175	0.276	0.521	Not
LINC01440	1.455	1.265	1.175	0.276	0.521	Not
LINC01096	1.455	1.265	1.175	0.276	0.521	Not
LINC02212	1.455	1.265	1.175	0.276	0.521	Not
MIR9-3HG	1.455	1.265	1.175	0.276	0.521	Not
LINC01749	1.455	1.265	1.175	0.276	0.521	Not
LINC01727	1.455	1.265	1.175	0.276	0.521	Not
CTBP1-AS	1.455	1.265	1.175	0.276	0.521	Not
SEC61G-DT	0.64	5.657	1.616	0.148	0.4	Not
GRK3-AS1	1.792	2.547	1.143	0.289	0.521	Not
LINC02989	-1.906	2.651	-1.176	0.276	0.521	Not
LINC00632	1.469	1.281	1.173	0.277	0.521	Not
IGBP1-AS2	1.469	1.281	1.173	0.277	0.521	Not
KCNMA1-AS1	1.469	1.281	1.173	0.277	0.521	Not
LINC01586	1.469	1.281	1.173	0.277	0.521	Not
LINC02855	1.469	1.281	1.173	0.277	0.521	Not
LINC02664	1.469	1.281	1.173	0.277	0.521	Not
LINC01451	1.469	1.281	1.173	0.277	0.521	Not
JADRR	1.469	1.281	1.173	0.277	0.521	Not
LINC01056	-1.438	1.265	-1.17	0.278	0.521	Not
LINC02109	-1.438	1.265	-1.17	0.278	0.521	Not
TCERG1L-AS1	-1.439	1.267	-1.169	0.279	0.521	Not
CAMTA1-DT	-0.633	6.542	-1.796	0.113	0.34	Not
LINC02321	1.391	4.707	1.385	0.206	0.492	Not
TRD-AS1	1.204	1.601	1.142	0.289	0.521	Not
ERBIN-DT	0.523	7.548	1.975	0.087	0.291	Not
LINC02395	-1.409	1.25	-1.161	0.282	0.521	Not
TMEM109-DT	-1.406	1.25	-1.159	0.283	0.521	Not
OSTM1-AS1	1.424	1.256	1.161	0.282	0.521	Not
SMCR5	1.424	1.256	1.161	0.282	0.521	Not
MFSD4B-DT	1.424	1.256	1.161	0.282	0.521	Not
MYO3B-AS1	1.424	1.256	1.161	0.282	0.521	Not
MACC1-DT	1.424	1.256	1.161	0.282	0.521	Not
LINC02273	1.424	1.256	1.161	0.282	0.521	Not
LINC02232	1.424	1.256	1.161	0.282	0.521	Not
LINC00491	1.424	1.256	1.161	0.282	0.521	Not
AGBL1-AS1	1.424	1.256	1.161	0.282	0.521	Not
LINC01570	1.424	1.256	1.161	0.282	0.521	Not
PRKCA-AS1	1.424	1.256	1.161	0.282	0.521	Not
LINC00868	1.424	1.256	1.161	0.282	0.521	Not
LINC02408	-1.376	1.222	-1.159	0.282	0.521	Not
LINC02593	-1.376	1.222	-1.159	0.282	0.521	Not
LINC02476	-1.376	1.222	-1.159	0.282	0.521	Not
HPN-AS1	-1.376	1.222	-1.159	0.282	0.521	Not
LINC01305	-1.376	1.222	-1.159	0.282	0.521	Not
LINC02458	-1.376	1.222	-1.159	0.282	0.521	Not
LINC02121	-1.376	1.222	-1.159	0.282	0.521	Not
LINC02258	-1.376	1.222	-1.159	0.282	0.521	Not
DNAAF3-AS1	-1.376	1.222	-1.159	0.282	0.521	Not
KLHDC7B-DT	-1.376	1.222	-1.159	0.282	0.521	Not
LINC00934	-1.376	1.222	-1.159	0.282	0.521	Not
KCNQ5-DT	-1.376	1.222	-1.159	0.282	0.521	Not
LINC02801	1.395	1.235	1.157	0.283	0.521	Not
CTDP1-DT	1.408	1.25	1.155	0.284	0.521	Not
B3GALT5-AS1	1.408	1.25	1.155	0.284	0.521	Not
RBM38-AS1	1.408	1.25	1.155	0.284	0.521	Not
LINC00114	1.408	1.25	1.155	0.284	0.521	Not
WARS2-IT1	1.408	1.25	1.155	0.284	0.521	Not
LINC02094	1.408	1.25	1.155	0.284	0.521	Not
BPESC1	1.408	1.25	1.155	0.284	0.521	Not
KAZN-AS1	1.408	1.25	1.155	0.284	0.521	Not
LINC00989	1.408	1.25	1.155	0.284	0.521	Not
LINC02757	1.408	1.25	1.155	0.284	0.521	Not
LINC02392	1.408	1.25	1.155	0.284	0.521	Not
LINC03038	1.408	1.25	1.155	0.284	0.521	Not
LINC03025	1.408	1.25	1.155	0.284	0.521	Not
LINC01033	1.039	4.681	1.371	0.21	0.497	Not
STARD4-AS1	-0.806	6.415	-1.748	0.122	0.356	Not
LINC01121	-1.363	1.229	-1.145	0.288	0.521	Not
LINC01743	-1.363	1.229	-1.145	0.288	0.521	Not
SH3RF3-AS1	0.832	5.35	1.519	0.17	0.436	Not
LINC02030	-1.6	2.315	-1.114	0.3	0.521	Not
LINC00440	1.364	1.22	1.147	0.287	0.521	Not
SRD5A3-AS1	1.479	1.353	1.137	0.291	0.521	Not
LINC00858	-1.351	1.222	-1.142	0.289	0.521	Not
LINC01522	-1.351	1.222	-1.142	0.289	0.521	Not
MAFA-AS1	-1.351	1.222	-1.142	0.289	0.521	Not
CEROX1	-1.351	1.222	-1.142	0.289	0.521	Not
PCAT19	-1.351	1.222	-1.142	0.289	0.521	Not
LINC00528	-1.351	1.222	-1.142	0.289	0.521	Not
ZBTB11-AS1	0.376	10.127	2.353	0.049	0.223	Not
PIK3CD-AS2	-2.627	3.209	-1.211	0.263	0.521	Not
PYDC2-AS1	-0.885	4.108	-1.246	0.251	0.521	Not
LINC02575	1.369	1.229	1.144	0.288	0.521	Not
LINC02014	1.369	1.229	1.144	0.288	0.521	Not
GSN-AS1	-1.939	5.284	-1.431	0.193	0.47	Not
GAPDH-DT	-0.533	7.276	-1.912	0.095	0.306	Not
LINC01238	-1.007	5.752	-1.583	0.155	0.412	Not
CTBP1-DT	0.786	7.705	1.978	0.086	0.29	Not
PSMD6-AS1	1.62	4.745	1.354	0.215	0.502	Not
LINC02433	1.332	1.204	1.137	0.291	0.521	Not
C21orf91-OT1	1.332	1.204	1.137	0.291	0.521	Not
PALLD-AS1	1.332	1.204	1.137	0.291	0.521	Not
DSEL-AS1	1.332	1.204	1.137	0.291	0.521	Not
LINC00466	-1.39	1.833	-1.097	0.307	0.521	Not
LINC01705	1.922	2.777	1.12	0.298	0.521	Not
IDH3B-DT	1.69	4.866	1.377	0.209	0.495	Not
KCNQ5-AS1	1.344	1.218	1.134	0.292	0.521	Not
RPL30-AS1	1.344	1.218	1.134	0.292	0.521	Not
FBXO3-DT	1.344	1.218	1.134	0.292	0.521	Not
IRAIN	1.344	1.218	1.134	0.292	0.521	Not
LINC01311	-0.304	9.626	-2.267	0.056	0.234	Not
DPH1-AS1	2.115	2.973	1.137	0.291	0.521	Not
E2F5-DT	0.734	5.716	1.595	0.152	0.408	Not
MYLK-AS2	1.138	3.032	1.087	0.311	0.521	Not
UPK1A-AS1	-1.31	1.203	-1.127	0.295	0.521	Not
LINC00575	-1.31	1.203	-1.127	0.295	0.521	Not
POU6F2-AS2	-1.31	1.203	-1.127	0.295	0.521	Not
HOXD-AS2	-1.31	1.203	-1.127	0.295	0.521	Not
LINC01168	-1.31	1.203	-1.127	0.295	0.521	Not
LINC00996	-1.31	1.203	-1.127	0.295	0.521	Not
LINC01331	-1.31	1.203	-1.127	0.295	0.521	Not
CERS3-AS1	-1.31	1.203	-1.127	0.295	0.521	Not
LINC02568	-1.31	1.203	-1.127	0.295	0.521	Not
TRIM7-AS2	0.841	4.675	1.354	0.215	0.502	Not
KIF18B-DT	0.749	6.909	1.843	0.105	0.325	Not
ITFG1-AS1	1.505	2.259	1.072	0.317	0.521	Not
IRAG1-AS1	1.32	1.204	1.127	0.295	0.521	Not
PAQR9-AS1	1.32	1.204	1.127	0.295	0.521	Not
LINC02268	1.32	1.204	1.127	0.295	0.521	Not
LINC01413	1.32	1.204	1.127	0.295	0.521	Not
CEP192-DT	1.32	1.204	1.127	0.295	0.521	Not
LINC01509	-1.275	1.171	-1.124	0.296	0.521	Not
LINC01038	-1.275	1.171	-1.124	0.296	0.521	Not
PROX1-AS1	-1.275	1.171	-1.124	0.296	0.521	Not
LINC02579	-1.275	1.171	-1.124	0.296	0.521	Not
JAKMIP3-AS1	-1.275	1.171	-1.124	0.296	0.521	Not
FIBCD1-AS1	-1.275	1.171	-1.124	0.296	0.521	Not
OVAAL	-1.275	1.171	-1.124	0.296	0.521	Not
TUSC8	-1.275	1.171	-1.124	0.296	0.521	Not
LINC01514	-1.275	1.171	-1.124	0.296	0.521	Not
GASK1B-AS1	-1.275	1.171	-1.124	0.296	0.521	Not
LINC02384	-1.275	1.171	-1.124	0.296	0.521	Not
KLC2-AS1	-1.275	1.171	-1.124	0.296	0.521	Not
HIF1A-AS3	-1.275	1.171	-1.124	0.296	0.521	Not
LINC01568	-1.275	1.171	-1.124	0.296	0.521	Not
MIR4713HG	-1.275	1.171	-1.124	0.296	0.521	Not
USP7-AS1	-1.275	1.171	-1.124	0.296	0.521	Not
SLC14A2-AS1	-1.275	1.171	-1.124	0.296	0.521	Not
MIR122HG	-1.275	1.171	-1.124	0.296	0.521	Not
PGM5P3-AS1	-1.275	1.171	-1.124	0.296	0.521	Not
LINC01521	-0.825	7.237	-1.884	0.099	0.314	Not
LINC01358	0.974	2.831	1.056	0.324	0.526	Not
ITPRIP-AS1	-1.629	2.422	-1.09	0.31	0.521	Not
CT66	-1.646	4.794	-1.332	0.222	0.51	Not
LINC02363	1.295	1.194	1.117	0.299	0.521	Not
TMEM72-AS1	1.295	1.194	1.117	0.299	0.521	Not
LINC02783	-0.375	10.249	-2.352	0.049	0.223	Not
AKT3-IT1	-1.123	1.107	-1.118	0.298	0.521	Not
LINC02688	-1.067	5.386	-1.481	0.18	0.451	Not
MYRF-AS1	1.101	1.564	1.083	0.313	0.521	Not
EWSAT1	1.38	2.097	1.054	0.325	0.527	Not
EGFR-AS1	1.268	1.171	1.114	0.3	0.521	Not
MIR3681HG	1.268	1.171	1.114	0.3	0.521	Not
LINC02766	1.268	1.171	1.114	0.3	0.521	Not
LINC02884	1.268	1.171	1.114	0.3	0.521	Not
UNC5B-AS1	1.268	1.171	1.114	0.3	0.521	Not
LINC01489	1.268	1.171	1.114	0.3	0.521	Not
RASSF3-DT	1.268	1.171	1.114	0.3	0.521	Not
MCM8-AS1	1.268	1.171	1.114	0.3	0.521	Not
TRG-AS1	1.268	1.171	1.114	0.3	0.521	Not
LINC02880	-1.251	1.171	-1.106	0.303	0.521	Not
LINC02913	-1.251	1.171	-1.106	0.303	0.521	Not
RDUR	-1.251	1.171	-1.106	0.303	0.521	Not
GRM7-AS3	-1.251	1.171	-1.106	0.303	0.521	Not
MYOCD-AS1	-1.251	1.171	-1.106	0.303	0.521	Not
LINC02525	-1.251	1.171	-1.106	0.303	0.521	Not
LINC02639	-1.251	1.171	-1.106	0.303	0.521	Not
LINC01698	-1.251	1.171	-1.106	0.303	0.521	Not
ELN-AS1	-1.251	1.171	-1.106	0.303	0.521	Not
LINC00690	-1.251	1.171	-1.106	0.303	0.521	Not
LINC01849	-1.251	1.171	-1.106	0.303	0.521	Not
LRRC52-AS1	-1.251	1.171	-1.106	0.303	0.521	Not
MLF1-DT	-1.251	1.171	-1.106	0.303	0.521	Not
LINC01998	-1.251	1.171	-1.106	0.303	0.521	Not
EGFLAM-AS4	-1.251	1.171	-1.106	0.303	0.521	Not
LINC02159	-1.251	1.171	-1.106	0.303	0.521	Not
LINC01419	-1.251	1.171	-1.106	0.303	0.521	Not
TTC12-DT	-1.251	1.171	-1.106	0.303	0.521	Not
LINC02552	-1.251	1.171	-1.106	0.303	0.521	Not
THSD4-AS1	-1.251	1.171	-1.106	0.303	0.521	Not
CORO1A-AS1	-1.251	1.171	-1.106	0.303	0.521	Not
ZNF45-AS1	-1.251	1.171	-1.106	0.303	0.521	Not
LINC02338	-1.251	1.171	-1.106	0.303	0.521	Not
CMKLR2-AS	-1.251	1.171	-1.106	0.303	0.521	Not
RBM5-AS1	-1.251	1.171	-1.106	0.303	0.521	Not
MGC4859	-1.251	1.171	-1.106	0.303	0.521	Not
HSPA2-AS1	-1.633	4.089	-1.188	0.271	0.521	Not
LINC02052	1.255	1.171	1.104	0.304	0.521	Not
SLC6A17-AS1	1.255	1.171	1.104	0.304	0.521	Not
LINC01647	1.255	1.171	1.104	0.304	0.521	Not
LINC00347	1.255	1.171	1.104	0.304	0.521	Not
PCED1B-AS1	1.255	1.171	1.104	0.304	0.521	Not
PRPF39-DT	1.255	1.171	1.104	0.304	0.521	Not
L1CAM-AS1	1.255	1.171	1.104	0.304	0.521	Not
LINC02930	1.255	1.171	1.104	0.304	0.521	Not
ZNF516-DT	1.255	1.171	1.104	0.304	0.521	Not
WDR5-DT	-1.179	4.425	-1.263	0.245	0.521	Not
IGF2BP2-AS1	-1.231	1.163	-1.097	0.307	0.521	Not
LINC02840	-1.231	1.163	-1.097	0.307	0.521	Not
HHLA3-AS1	-1.231	1.163	-1.097	0.307	0.521	Not
RAPGEF4-AS1	-1.231	1.163	-1.097	0.307	0.521	Not
PLPPR5-AS1	-1.231	1.163	-1.097	0.307	0.521	Not
MNX1-AS2	-1.231	1.163	-1.097	0.307	0.521	Not
TERLR1	-1.231	1.163	-1.097	0.307	0.521	Not
LINC02994	-1.231	1.163	-1.097	0.307	0.521	Not
SNHG27	-1.231	1.163	-1.097	0.307	0.521	Not
STAU2-AS1	-1.231	1.163	-1.097	0.307	0.521	Not
LINC02734	-1.231	1.163	-1.097	0.307	0.521	Not
LINC02318	-1.231	1.163	-1.097	0.307	0.521	Not
LINC02302	-1.231	1.163	-1.097	0.307	0.521	Not
PWRN1	-1.231	1.163	-1.097	0.307	0.521	Not
LINC02183	-1.231	1.163	-1.097	0.307	0.521	Not
LINC02775	-1.231	1.163	-1.097	0.307	0.521	Not
LINC01949	-1.231	1.163	-1.097	0.307	0.521	Not
IGBP1-AS1	1.251	1.171	1.101	0.305	0.521	Not
TONSL-AS1	1.251	1.171	1.101	0.305	0.521	Not
LINC02513	1.251	1.171	1.101	0.305	0.521	Not
LINC01333	1.251	1.171	1.101	0.305	0.521	Not
HPYR1	1.251	1.171	1.101	0.305	0.521	Not
LINC01195	1.251	1.171	1.101	0.305	0.521	Not
ZNF222-DT	1.251	1.171	1.101	0.305	0.521	Not
LINC02028	-1.146	3.028	-1.07	0.318	0.521	Not
UBQLN1-AS1	-0.976	5.766	-1.558	0.161	0.421	Not
ABCC5-AS1	-1.2	1.134	-1.095	0.308	0.521	Not
LINC02908	-2	2.921	-1.104	0.304	0.521	Not
LINC02972	1.262	1.935	1.036	0.333	0.531	Not
LINC00971	1.228	1.16	1.092	0.309	0.521	Not
KRT7-AS	-2.037	2.897	-1.103	0.304	0.521	Not
LINC00954	-0.767	5.293	-1.451	0.188	0.462	Not
ATP2A1-AS1	-1.637	6.032	-1.563	0.16	0.419	Not
LINC02724	1.192	1.133	1.085	0.312	0.521	Not
LINC01767	1.192	1.133	1.085	0.312	0.521	Not
LINC02249	1.192	1.133	1.085	0.312	0.521	Not
FARP1-AS1	1.192	1.133	1.085	0.312	0.521	Not
OBI1-AS1	1.192	1.133	1.085	0.312	0.521	Not
LINC02006	1.192	1.133	1.085	0.312	0.521	Not
LNCBRM	1.192	1.133	1.085	0.312	0.521	Not
LINC02254	1.192	1.133	1.085	0.312	0.521	Not
IDH2-DT	1.192	1.133	1.085	0.312	0.521	Not
CDH8-AS1	1.192	1.133	1.085	0.312	0.521	Not
LINC02073	1.192	1.133	1.085	0.312	0.521	Not
LINC02858	1.192	1.133	1.085	0.312	0.521	Not
METTL14-DT	-0.654	5.57	-1.513	0.172	0.438	Not
LINC02932	1.09	1.807	1.028	0.336	0.535	Not
LINC01471	-1.176	1.134	-1.076	0.316	0.521	Not
CIBAR1-DT	-1.176	1.134	-1.076	0.316	0.521	Not
LINC02198	-1.176	1.134	-1.076	0.316	0.521	Not
NPHP3-AS1	1.335	2.097	1.011	0.344	0.536	Not
LINC02889	0.927	3.335	1.05	0.327	0.527	Not
TROAP-AS1	-0.944	7.761	-1.937	0.092	0.301	Not
LINC00663	-1.191	3.313	-1.068	0.319	0.521	Not
MIAT	0.898	4.131	1.192	0.27	0.521	Not
DSCAS	1.214	2.338	1	0.349	0.54	Not
HAGLR	1.42	2.153	1.007	0.346	0.537	Not
LINC01169	1.48	2.334	1.006	0.346	0.537	Not
LINC01907	-1.143	1.106	-1.071	0.318	0.521	Not
LINC01985	-1.143	1.106	-1.071	0.318	0.521	Not
LINC02024	-1.143	1.106	-1.071	0.318	0.521	Not
MEF2C-AS2	-1.143	1.106	-1.071	0.318	0.521	Not
LINC02313	-1.143	1.106	-1.071	0.318	0.521	Not
LINC02322	-1.143	1.106	-1.071	0.318	0.521	Not
LINC02206	-1.143	1.106	-1.071	0.318	0.521	Not
TUBGCP2	-1.158	1.126	-1.068	0.319	0.521	Not
PSD2-AS1	-1.158	1.126	-1.068	0.319	0.521	Not
NIPAL4-DT	-1.158	1.126	-1.068	0.319	0.521	Not
LINC02571	-1.158	1.126	-1.068	0.319	0.521	Not
ZFP3-DT	-1.158	1.126	-1.068	0.319	0.521	Not
LINC00336	1.173	1.13	1.072	0.317	0.521	Not
TH2LCRR	1.173	1.13	1.072	0.317	0.521	Not
CCR5AS	1.173	1.13	1.072	0.317	0.521	Not
LINC01946	1.173	1.13	1.072	0.317	0.521	Not
PSLNR	1.173	1.13	1.072	0.317	0.521	Not
LINCMD1	1.173	1.13	1.072	0.317	0.521	Not
TMSB15B-AS1	1.173	1.13	1.072	0.317	0.521	Not
SLC26A4-AS1	1.173	1.13	1.072	0.317	0.521	Not
BSN-AS1	1.173	1.13	1.072	0.317	0.521	Not
SMAD9-IT1	1.173	1.13	1.072	0.317	0.521	Not
LINC02863	1.173	1.13	1.072	0.317	0.521	Not
LINC00500	1.173	1.13	1.072	0.317	0.521	Not
NIHCOLE	1.173	1.13	1.072	0.317	0.521	Not
DCHS1-AS1	1.173	1.13	1.072	0.317	0.521	Not
LINC02825	1.173	1.13	1.072	0.317	0.521	Not
ABHD15-AS1	1.173	1.13	1.072	0.317	0.521	Not
SALRNA2	1.173	1.13	1.072	0.317	0.521	Not
NALF1-IT1	1.514	2.429	1.006	0.346	0.537	Not
TMEM78	1.166	1.129	1.068	0.319	0.521	Not
CTNNA2-AS1	1.166	1.129	1.068	0.319	0.521	Not
TLE1-DT	1.166	1.129	1.068	0.319	0.521	Not
ERICH3-AS1	1.166	1.129	1.068	0.319	0.521	Not
LINC01447	1.166	1.129	1.068	0.319	0.521	Not
MRGPRG-AS1	1.166	1.129	1.068	0.319	0.521	Not
LINC01497	1.166	1.129	1.068	0.319	0.521	Not
IRS4-AS1	1.166	1.129	1.068	0.319	0.521	Not
PRICKLE2-AS1	1.166	1.129	1.068	0.319	0.521	Not
LINC01194	1.166	1.129	1.068	0.319	0.521	Not
MSRB3-AS1	1.166	1.129	1.068	0.319	0.521	Not
LINC02995	1.166	1.129	1.068	0.319	0.521	Not
LINC02842	1.166	1.129	1.068	0.319	0.521	Not
RNASE11-AS1	1.166	1.129	1.068	0.319	0.521	Not
LINC01582	1.166	1.129	1.068	0.319	0.521	Not
DDX59-AS1	1.166	1.129	1.068	0.319	0.521	Not
LINC00683	1.166	1.129	1.068	0.319	0.521	Not
PLCE1-AS1	1.166	1.129	1.068	0.319	0.521	Not
PDE3A-AS1	-1.608	4.62	-1.254	0.248	0.521	Not
ZNF350-AS1	1.224	1.943	0.998	0.35	0.541	Not
LINC02043	-2.356	5.713	-1.424	0.195	0.473	Not
LINC01978	-1.445	2.329	-1.005	0.346	0.537	Not
GSTCD-AS1	-1.12	1.106	-1.052	0.326	0.527	Not
NAV2-AS2	-1.12	1.106	-1.052	0.326	0.527	Not
LINC01393	-1.115	1.105	-1.049	0.327	0.528	Not
CPEB1-AS1	-1.115	1.105	-1.049	0.327	0.528	Not
ZNF460-AS1	-1.139	6.591	-1.701	0.13	0.371	Not
PRDM8-AS1	1.742	2.765	1.012	0.343	0.536	Not
LINC02777	0.905	5.757	1.539	0.165	0.427	Not
LINC02831	1.517	2.472	0.981	0.357	0.549	Not
PRR29-AS1	-1.559	2.503	-1.008	0.345	0.537	Not
CCNJ	0.37	11.032	2.436	0.043	0.212	Not
LINC01446	1.107	1.098	1.044	0.329	0.53	Not
RN7SL832P	0.567	8.67	2.067	0.075	0.27	Not
LINC01968	0.973	1.613	0.997	0.35	0.541	Not
LINC02758	-0.589	6.823	-1.764	0.119	0.35	Not
OXCT1-AS1	-0.679	7.885	-1.941	0.091	0.3	Not
LINC03015	-0.627	7.742	-1.919	0.094	0.304	Not
LINC02960	0.365	8.614	2.057	0.076	0.271	Not
PRKACB-DT	0.481	9.082	2.128	0.069	0.259	Not
YWHAH-AS1	0.88	3.989	1.126	0.295	0.521	Not
PLCE1	0.743	5.734	1.53	0.168	0.432	Not
LINP1	-0.382	9.087	-2.126	0.069	0.259	Not
C1orf167-AS1	-1.064	1.067	-1.035	0.333	0.531	Not
PSG8-AS1	-1.064	1.067	-1.035	0.333	0.531	Not
LINC01388	-1.064	1.067	-1.035	0.333	0.531	Not
MACROD2-AS1	-1.064	1.067	-1.035	0.333	0.531	Not
DCTN1-AS1	-1.064	1.067	-1.035	0.333	0.531	Not
LINC00870	-1.064	1.067	-1.035	0.333	0.531	Not
FGF10-AS1	-1.064	1.067	-1.035	0.333	0.531	Not
CDH13-AS2	-1.064	1.067	-1.035	0.333	0.531	Not
LINC01478	-1.064	1.067	-1.035	0.333	0.531	Not
JARID2-DT	-0.856	6.564	-1.697	0.131	0.372	Not
LINC02915	1.083	1.079	1.038	0.332	0.531	Not
LINC01392	1.083	1.079	1.038	0.332	0.531	Not
LINC02497	1.083	1.079	1.038	0.332	0.531	Not
CYP51A1-AS1	-1	5.895	-1.541	0.165	0.427	Not
MYCL-AS1	2.287	3.303	1.054	0.325	0.527	Not
ADGRD1-AS1	1.377	1.497	0.996	0.351	0.542	Not
MIR155HG	1.645	3.88	1.084	0.312	0.521	Not
LOH12CR2	0.988	7.137	1.811	0.111	0.336	Not
DGCR11	0.322	11.043	2.428	0.044	0.213	Not
RRAGAP1-AS1	1.081	2.115	0.945	0.375	0.559	Not
MAMDC2-AS1	-0.976	4.009	-1.107	0.303	0.521	Not
LINC02796	-1.049	1.072	-1.018	0.341	0.535	Not
NEBL-AS1	-1.049	1.072	-1.018	0.341	0.535	Not
RERE-AS1	-1.049	1.072	-1.018	0.341	0.535	Not
LINC02146	-1.049	1.072	-1.018	0.341	0.535	Not
LINC01365	-1.049	1.072	-1.018	0.341	0.535	Not
NCRNA00250	-1.049	1.072	-1.018	0.341	0.535	Not
CSRP3-AS1	-1.049	1.072	-1.018	0.341	0.535	Not
LINC02964	-1.049	1.072	-1.018	0.341	0.535	Not
PPP3CB-AS1	0.691	7.451	1.865	0.102	0.319	Not
LINC01414	1.111	1.157	1.013	0.343	0.535	Not
C14orf178	1.055	1.071	1.021	0.34	0.535	Not
GPC5-AS2	1.055	1.071	1.021	0.34	0.535	Not
B3GALT1-AS1	1.055	1.071	1.021	0.34	0.535	Not
TRIM67-AS1	1.055	1.071	1.021	0.34	0.535	Not
RUNX2-AS1	1.055	1.071	1.021	0.34	0.535	Not
RASAL2-AS1	-1.012	7.141	-1.793	0.114	0.341	Not
ARLNC1	-0.859	4.093	-1.12	0.298	0.521	Not
LINC01630	-1.035	1.063	-1.013	0.343	0.535	Not
TLR8-AS1	-1.035	1.063	-1.013	0.343	0.535	Not
HRAT17	-1.035	1.063	-1.013	0.343	0.535	Not
LINC01072	-1.035	1.063	-1.013	0.343	0.535	Not
LINC02453	-1.035	1.063	-1.013	0.343	0.535	Not
STPG2-AS1	-1.035	1.063	-1.013	0.343	0.535	Not
KRT73-AS1	-1.035	1.063	-1.013	0.343	0.535	Not
LINC01109	-1.035	1.063	-1.013	0.343	0.535	Not
LINC00963	-0.543	6.687	-1.723	0.126	0.365	Not
LMO7DN-IT1	1.051	1.071	1.017	0.341	0.535	Not
LINC01914	1.051	1.071	1.017	0.341	0.535	Not
RDH10-AS1	1.051	1.071	1.017	0.341	0.535	Not
TET2-AS1	1.051	1.071	1.017	0.341	0.535	Not
KLC4-AS1	1.051	1.071	1.017	0.341	0.535	Not
RBAKDN	1.051	1.071	1.017	0.341	0.535	Not
CARNMT1-AS1	1.413	2.699	0.945	0.375	0.559	Not
DIS3L-AS1	-0.973	1.832	-0.949	0.373	0.557	Not
LINC01315	1.692	3.153	0.991	0.353	0.543	Not
GALNT16-AS1	-1.266	2.471	-0.941	0.376	0.559	Not
LINC02434	-1.07	5.487	-1.42	0.196	0.475	Not
STARD13-AS	1.38	2.354	0.922	0.386	0.564	Not
FAM83A-AS2	-1.307	2.268	-0.935	0.379	0.559	Not
LINC00161	1.293	2.229	0.919	0.387	0.565	Not
TMEM14B-DT	0.665	6.22	1.623	0.146	0.397	Not
CPLANE1-AS1	-0.428	9.131	-2.111	0.071	0.261	Not
SUV39H2-DT	0.776	8.042	1.943	0.091	0.3	Not
MIR1302-2HG	0.938	2.781	0.899	0.397	0.571	Not
LINC01633	-2.053	3.18	-1.008	0.345	0.537	Not
LINC00511	0.457	7.516	1.859	0.103	0.321	Not
THBS1-IT1	0.627	5.24	1.374	0.21	0.496	Not
LINC02263	1.024	2.219	0.891	0.401	0.575	Not
AGBL5-AS1	1.167	5.043	1.311	0.229	0.52	Not
CXXC4-AS1	-1.705	2.826	-0.97	0.363	0.552	Not
LINC02518	-1.085	2.699	-0.913	0.39	0.568	Not
CBLL1-AS1	0.626	5.591	1.457	0.186	0.459	Not
MICOS10-DT	-1.422	2.487	-0.916	0.389	0.567	Not
PSMD7-DT	0.773	3.721	1.009	0.345	0.537	Not
LINC02150	-1.843	5.567	-1.364	0.213	0.499	Not
IQCJ-SCHIP1-AS1	-1.385	4.019	-1.053	0.326	0.527	Not
DPP3-DT	0.569	6.77	1.719	0.127	0.366	Not
LINC02613	1.199	2.553	0.876	0.409	0.581	Not
MTUS2-AS1	1.509	2.652	0.896	0.399	0.573	Not
LINC01039	1.585	2.802	0.905	0.394	0.57	Not
SFTA1P	0.95	1.013	0.972	0.362	0.552	Not
ZNF503-AS1	0.95	1.013	0.972	0.362	0.552	Not
CACNA1C-AS1	0.95	1.013	0.972	0.362	0.552	Not
PRKG2-AS1	0.95	1.013	0.972	0.362	0.552	Not
LINC00555	0.95	1.013	0.972	0.362	0.552	Not
ERVK-28	0.95	1.013	0.972	0.362	0.552	Not
ERLNC1	1.512	3.047	0.915	0.389	0.567	Not
PKD1L1-AS1	-0.926	0.998	-0.962	0.366	0.552	Not
TDRG1	-0.926	0.998	-0.962	0.366	0.552	Not
BCRP3	-0.926	0.998	-0.962	0.366	0.552	Not
P3H2-AS1	-0.926	0.998	-0.962	0.366	0.552	Not
LINC00200	-0.926	0.998	-0.962	0.366	0.552	Not
LINC01911	-0.926	0.998	-0.962	0.366	0.552	Not
CHRM3-AS2	-0.926	0.998	-0.962	0.366	0.552	Not
LINC00299	-0.926	0.998	-0.962	0.366	0.552	Not
LINC02773	-0.926	0.998	-0.962	0.366	0.552	Not
LINC02096	-0.926	0.998	-0.962	0.366	0.552	Not
LINC00635	-0.926	0.998	-0.962	0.366	0.552	Not
AADACL2-AS1	-0.926	0.998	-0.962	0.366	0.552	Not
ITGB5-AS1	-0.926	0.998	-0.962	0.366	0.552	Not
LINC02438	-0.926	0.998	-0.962	0.366	0.552	Not
LINC02225	-0.926	0.998	-0.962	0.366	0.552	Not
LINC01170	-0.926	0.998	-0.962	0.366	0.552	Not
LINC02763	-0.926	0.998	-0.962	0.366	0.552	Not
LINC01479	-0.926	0.998	-0.962	0.366	0.552	Not
LINC02367	-0.926	0.998	-0.962	0.366	0.552	Not
HID1-AS1	-0.926	0.998	-0.962	0.366	0.552	Not
CCDC13-AS2	1.36	2.48	0.869	0.412	0.585	Not
EFCAB14-AS1	-0.934	1.014	-0.959	0.368	0.553	Not
HAR1B	-0.934	1.014	-0.959	0.368	0.553	Not
LMLN-AS1	-0.934	1.014	-0.959	0.368	0.553	Not
LINC00968	-0.934	1.014	-0.959	0.368	0.553	Not
LINC00919	-0.934	1.014	-0.959	0.368	0.553	Not
CPVL-AS2	-0.934	1.014	-0.959	0.368	0.553	Not
SEPTIN14P23	-0.739	0.91	-0.967	0.364	0.552	Not
HELLPAR	-0.7	15.171	-3.277	0.013	0.099	Not
SLC8A1-AS1	-0.736	0.914	-0.963	0.366	0.552	Not
TNFRSF14-AS1	-1.227	2.212	-0.871	0.411	0.583	Not
LINC00641	0.392	8.866	2.045	0.078	0.273	Not
POC1B-AS1	-0.479	10.264	-2.258	0.056	0.234	Not
LINC00677	-1.447	2.611	-0.891	0.401	0.575	Not
LINC00891	1.138	2.419	0.844	0.425	0.592	Not
PPP1R9A-AS1	-1.168	2.452	-0.865	0.414	0.586	Not
LINC03002	0.925	1.008	0.952	0.371	0.555	Not
MRTFA-AS1	0.925	1.008	0.952	0.371	0.555	Not
SMIM2-IT1	0.925	1.008	0.952	0.371	0.555	Not
MIR200CHG	0.925	1.008	0.952	0.371	0.555	Not
EPHA2-AS1	0.622	8.697	2.016	0.081	0.28	Not
C10orf95-AS1	-1.036	6.186	-1.545	0.164	0.425	Not
CRMA	0.92	1.004	0.951	0.372	0.556	Not
VOPP1-DT	0.92	1.004	0.951	0.372	0.556	Not
LINC02853	0.92	1.004	0.951	0.372	0.556	Not
ARHGAP26-IT1	0.548	7.501	1.83	0.108	0.33	Not
LINC00484	-1.256	2.345	-0.852	0.421	0.591	Not
KIAA0087	-0.884	0.988	-0.931	0.381	0.559	Not
DIP2C-AS1	-0.884	0.988	-0.931	0.381	0.559	Not
LINC02610	-0.884	0.988	-0.931	0.381	0.559	Not
FAM230D	-0.884	0.988	-0.931	0.381	0.559	Not
ZBTB24-DT	-0.884	0.988	-0.931	0.381	0.559	Not
LINC01526	-0.884	0.988	-0.931	0.381	0.559	Not
CFAP95-DT	-0.884	0.988	-0.931	0.381	0.559	Not
ANKRD65-AS1	-0.884	0.988	-0.931	0.381	0.559	Not
LINC01659	-0.884	0.988	-0.931	0.381	0.559	Not
LINC01093	-0.884	0.988	-0.931	0.381	0.559	Not
MARCHF11-DT	-0.884	0.988	-0.931	0.381	0.559	Not
LINC02820	-0.884	0.988	-0.931	0.381	0.559	Not
GREM1-AS1	-0.884	0.988	-0.931	0.381	0.559	Not
PKD1-AS1	-0.884	0.988	-0.931	0.381	0.559	Not
LINC02564	-0.884	0.988	-0.931	0.381	0.559	Not
KCNIP4-IT1	-0.884	0.988	-0.931	0.381	0.559	Not
ELFN2	-0.614	5.809	-1.468	0.183	0.455	Not
LINC01301	-1.133	1.853	-0.855	0.419	0.591	Not
SNAP25-AS1	-0.81	3.496	-0.915	0.389	0.567	Not
CD2AP-DT	1.035	5.272	1.329	0.223	0.51	Not
DYRK3-AS1	-1.281	4.049	-1.014	0.343	0.535	Not
SOX9-AS1	0.809	3.25	0.862	0.416	0.587	Not
LINC01724	1.235	1.578	0.868	0.413	0.585	Not
LINC01063	-1.667	2.834	-0.901	0.396	0.571	Not
LINC02422	1.328	2.567	0.82	0.438	0.604	Not
HEY2-AS1	1.822	3.174	0.901	0.396	0.571	Not
RPS6KB2-AS1	1.249	2.424	0.812	0.442	0.607	Not
ANKRD44-DT	-1.335	2.511	-0.84	0.427	0.594	Not
CDC37L1-DT	0.79	5.318	1.34	0.22	0.507	Not
BMPR1B-DT	1.469	3.115	0.864	0.415	0.586	Not
GJD2-DT	1.2	4.06	1.017	0.341	0.535	Not
LINC02601	-1.541	2.813	-0.878	0.407	0.579	Not
RANBP3-DT	1.265	4.254	1.059	0.323	0.525	Not
LINC01637	-1.953	3.224	-0.929	0.382	0.56	Not
GRIK1-AS1	0.938	4.816	1.203	0.266	0.521	Not
LINC01002	1.265	3.17	0.851	0.421	0.591	Not
PDK4-AS1	0.958	2.104	0.799	0.449	0.613	Not
LINC01625	-1.106	2.079	-0.81	0.443	0.608	Not
IGFBP7-AS1	-0.692	0.886	-0.911	0.391	0.568	Not
ZEB1-AS1	-0.472	6.902	-1.697	0.131	0.372	Not
LINC01058	0.878	4.967	1.237	0.254	0.521	Not
USP12-DT	1.746	3.473	0.898	0.398	0.572	Not
COQ7-DT	-1.372	2.628	-0.831	0.432	0.598	Not
EHD4-AS1	-1.246	2.429	-0.815	0.44	0.606	Not
DLEU1	0.512	6.911	1.703	0.13	0.37	Not
GAS1RR	-0.56	9.026	-2.036	0.079	0.274	Not
STUB1-DT	-1.015	5.965	-1.463	0.185	0.457	Not
FOSL2-AS1	1.8	5.328	1.286	0.237	0.521	Not
PANDAR	1.028	1.974	0.796	0.451	0.614	Not
ERICH2	0.649	4.214	1.046	0.329	0.529	Not
TPBGL-AS1	-0.685	0.888	-0.901	0.396	0.571	Not
LINC02154	0.623	5.433	1.356	0.215	0.502	Not
TRIM31-AS1	-1.095	2.011	-0.798	0.45	0.614	Not
CNN3-DT	0.763	5.009	1.242	0.252	0.521	Not
STAG2-AS1	0.856	4.333	1.069	0.319	0.521	Not
LINC02033	-0.958	3.244	-0.839	0.427	0.594	Not
PSMD14-DT	1.144	2.328	0.768	0.466	0.626	Not
HEATR5A-DT	-1.258	3.644	-0.899	0.397	0.571	Not
TTLL11	-1.539	5.027	-1.196	0.269	0.521	Not
TBX3-AS1	-0.789	2.258	-0.766	0.467	0.627	Not
CCAT2	-1.169	3.874	-0.934	0.38	0.559	Not
TSIX	1.271	3.909	0.943	0.375	0.559	Not
LINC01213	0.807	0.942	0.886	0.404	0.576	Not
LINC02700	0.807	0.942	0.886	0.404	0.576	Not
THRIL	0.807	0.942	0.886	0.404	0.576	Not
LINC02695	1.569	3.014	0.824	0.436	0.603	Not
PPP1R13B-DT	1.234	2.909	0.781	0.459	0.621	Not
LINC02354	-0.828	1.802	-0.788	0.455	0.618	Not
MYLK-AS1	-0.947	6.781	-1.64	0.143	0.391	Not
OXR1	0.502	6.235	1.549	0.163	0.424	Not
BACH1-IT2	0.78	2.957	0.756	0.473	0.631	Not
USP30-AS1	1.122	2.34	0.749	0.477	0.635	Not
LINC01828	1.028	2.384	0.743	0.481	0.637	Not
CHUK-DT	0.743	4.997	1.222	0.259	0.521	Not
LINC02365	1.087	2.249	0.743	0.48	0.637	Not
CCDC28A-AS1	1.544	3.369	0.837	0.429	0.596	Not
MYO1B-AS1	-1.473	4.963	-1.17	0.278	0.521	Not
LINC01119	0.826	4.48	1.083	0.313	0.521	Not
GAS5-AS1	0.795	6.376	1.566	0.159	0.418	Not
LINC01036	-0.768	0.92	-0.862	0.416	0.587	Not
LINC02821	-1.042	3.868	-0.914	0.39	0.567	Not
ZEB2-AS1	1.021	3.656	0.869	0.412	0.585	Not
SPAG16-DT	-1.267	4.069	-0.953	0.371	0.555	Not
LINC01800	-1.301	2.653	-0.78	0.46	0.621	Not
CBR1-AS1	-1.461	4.981	-1.17	0.278	0.521	Not
BTG2-DT	1.023	3.752	0.889	0.402	0.576	Not
SATB1-AS1	-0.818	1.707	-0.772	0.464	0.625	Not
LINC01704	-1.229	2.528	-0.757	0.472	0.631	Not
PELP1-DT	-1.489	4.918	-1.147	0.287	0.521	Not
CERS6-AS1	-1.164	2.461	-0.746	0.479	0.635	Not
MIR17HG	-0.74	8.183	-1.876	0.1	0.317	Not
FLJ40194	-0.759	0.926	-0.848	0.423	0.591	Not
LRRC3-DT	-0.759	0.926	-0.848	0.423	0.591	Not
MAPK10-AS1	-0.759	0.926	-0.848	0.423	0.591	Not
LINC00678	-0.759	0.926	-0.848	0.423	0.591	Not
LINC02718	-0.759	0.926	-0.848	0.423	0.591	Not
LINC00567	-0.759	0.926	-0.848	0.423	0.591	Not
LINC01415	-0.759	0.926	-0.848	0.423	0.591	Not
LINC01488	-0.759	0.926	-0.848	0.423	0.591	Not
FOXP1-IT1	-0.225	11.244	-2.365	0.048	0.221	Not
FER1L6-AS2	1.078	2.349	0.715	0.497	0.65	Not
MAP3K5-AS2	0.765	0.928	0.853	0.42	0.591	Not
HTT-AS	-1.262	2.566	-0.748	0.478	0.635	Not
LINC02926	1.086	5.605	1.354	0.216	0.502	Not
ITPKB-IT1	-1.013	3.788	-0.878	0.407	0.579	Not
CFAP58-DT	1.3	4.345	1.022	0.339	0.535	Not
ZDHHC20-IT1	0.696	5.124	1.236	0.254	0.521	Not
PACRG-AS3	0.755	0.921	0.847	0.423	0.591	Not
RAI1-AS1	0.755	0.921	0.847	0.423	0.591	Not
LINC00293	0.755	0.921	0.847	0.423	0.591	Not
IPO9-AS1	0.872	4.955	1.184	0.273	0.521	Not
KLF2-DT	-0.7	4.407	-1.037	0.332	0.531	Not
JAZF1-AS1	-1.203	2.752	-0.749	0.477	0.635	Not
LINC01208	0.903	1.267	0.796	0.451	0.614	Not
C10orf55	-1.7	3.126	-0.815	0.441	0.606	Not
LINC00691	-0.95	2.002	-0.722	0.493	0.646	Not
ZMPSTE24-DT	-0.307	10.598	-2.25	0.057	0.235	Not
ECI1-AS1	-1.103	2.43	-0.71	0.499	0.652	Not
SYBU-AS1	-0.824	7.02	-1.666	0.137	0.382	Not
LINC01535	0.986	1.457	0.763	0.469	0.628	Not
LINC01819	0.999	1.489	0.757	0.473	0.631	Not
SERTAD4-AS1	-0.554	5.759	-1.385	0.206	0.492	Not
LINC03034	-0.805	2.987	-0.722	0.493	0.646	Not
LINC01010	-0.655	3.615	-0.816	0.44	0.606	Not
LINC01391	0.723	6.47	1.564	0.159	0.418	Not
TACR3-AS1	-1.046	2.869	-0.728	0.489	0.644	Not
PNN-AS1	0.838	2.14	0.678	0.518	0.669	Not
STXBP5-AS1	0.628	3.635	0.822	0.437	0.604	Not
LPGAT1-AS1	0.85	2.32	0.663	0.528	0.677	Not
NEGR1-IT1	-0.922	2.19	-0.683	0.516	0.666	Not
LINC02541	-1.173	3.214	-0.765	0.468	0.627	Not
LINC02666	-1.265	2.628	-0.717	0.495	0.649	Not
EPIC1	0.702	1.938	0.688	0.513	0.664	Not
FKTN-AS1	-1.169	2.611	-0.704	0.503	0.656	Not
LINC02805	0.772	1.067	0.791	0.454	0.616	Not
UQCRB-AS1	-0.785	1.846	-0.696	0.507	0.66	Not
SIAH2-AS1	0.804	4.143	0.946	0.374	0.559	Not
LINC02348	0.986	2.587	0.649	0.536	0.68	Not
LINC02966	-0.809	6.004	-1.423	0.195	0.473	Not
AFDN-DT	-1.178	2.652	-0.7	0.505	0.658	Not
LINC01224	-0.823	2.747	-0.671	0.523	0.672	Not
ALG1	-1.765	3.358	-0.803	0.447	0.611	Not
CAPN1-AS1	0.859	7.094	1.674	0.136	0.379	Not
LINC02478	-0.692	4.899	-1.133	0.293	0.521	Not
AFAP1-AS1	1.599	3.293	0.756	0.473	0.631	Not
LINC02941	-0.797	1.746	-0.692	0.51	0.661	Not
FAM87B	1.111	2.974	0.673	0.521	0.671	Not
TSBP1-AS1	0.903	2.119	0.648	0.537	0.68	Not
LINC01886	-0.88	3.025	-0.694	0.509	0.66	Not
FAM106A	0.689	7.285	1.706	0.129	0.37	Not
CAMTA1-IT1	0.849	2.431	0.622	0.552	0.694	Not
ERICH2-DT	0.765	3.346	0.71	0.499	0.652	Not
SLC2A1-DT	-0.556	5.541	-1.302	0.232	0.521	Not
MIR325HG	-0.671	5.482	-1.28	0.239	0.521	Not
PPP1R15B-AS1	-1.022	2.446	-0.643	0.54	0.683	Not
LINC02287	-1.313	2.918	-0.708	0.501	0.653	Not
NOS3	0.502	9.6	2.068	0.075	0.27	Not
TTC9-DT	0.931	1.529	0.694	0.509	0.66	Not
LINC00624	0.931	1.529	0.694	0.509	0.66	Not
LINC02765	-0.582	3.386	-0.715	0.496	0.65	Not
NCBP2-AS1	-1.119	2.652	-0.659	0.53	0.677	Not
PSORS1C3	-1.299	7.075	-1.624	0.146	0.397	Not
SNHG1	0.369	7.476	1.731	0.125	0.363	Not
NFE4	0.586	7.61	1.751	0.121	0.355	Not
RERG-IT1	-0.792	4.734	-1.066	0.32	0.522	Not
SMARCA5-AS1	-1.05	2.552	-0.639	0.542	0.685	Not
SPART-AS1	-0.566	5.561	-1.299	0.233	0.521	Not
LINC00626	-1.046	2.555	-0.634	0.545	0.687	Not
LINC00189	0.854	1.381	0.704	0.503	0.656	Not
SNHG28	0.981	2.706	0.605	0.563	0.703	Not
LINC02197	0.844	1.378	0.698	0.506	0.659	Not
BCAR4	0.913	2.947	0.613	0.558	0.698	Not
LINC02008	0.79	1.258	0.712	0.499	0.652	Not
THBS1-AS1	1.124	3.779	0.794	0.452	0.615	Not
LINC00882	-0.576	3.856	-0.819	0.438	0.605	Not
LINC01409	0.435	7.471	1.723	0.126	0.365	Not
BZW1-AS1	-1.268	2.912	-0.68	0.517	0.668	Not
FAM242E	0.678	0.972	0.75	0.477	0.635	Not
LINC01473	0.687	3.634	0.756	0.473	0.631	Not
DKFZP434A062	-1.285	2.96	-0.671	0.523	0.672	Not
ROPN1L-AS1	0.818	2.503	0.569	0.586	0.723	Not
REV3L-IT1	-0.432	6.944	-1.621	0.147	0.398	Not
LINC01684	-0.6	3.822	-0.8	0.449	0.613	Not
FAM242C	0.639	4.091	0.885	0.404	0.576	Not
PHLDA1-AS1	0.668	0.965	0.743	0.48	0.637	Not
ZBTB47-AS1	-0.666	4.333	-0.94	0.377	0.559	Not
GRAPLDR	-0.673	1.801	-0.619	0.555	0.695	Not
SPON1-AS1	-0.856	2.235	-0.582	0.578	0.716	Not
PRPF18	0.524	5.857	1.374	0.21	0.496	Not
FAM193B-DT	-1.132	5.439	-1.221	0.259	0.521	Not
LINC02929	-0.893	2.362	-0.573	0.584	0.721	Not
LINC02768	-0.61	0.842	-0.738	0.483	0.638	Not
LINC02580	-0.61	0.842	-0.738	0.483	0.638	Not
LINC02669	-0.61	0.842	-0.738	0.483	0.638	Not
LINC02469	-0.61	0.842	-0.738	0.483	0.638	Not
LINC02220	-0.61	0.842	-0.738	0.483	0.638	Not
LINC01256	-0.61	0.842	-0.738	0.483	0.638	Not
FAM230A	-0.61	0.842	-0.738	0.483	0.638	Not
FAM41C	0.736	2.488	0.54	0.605	0.735	Not
LINC00536	0.716	4.3	0.928	0.382	0.56	Not
MCPH1-DT	-0.315	9.705	-2.063	0.076	0.27	Not
ZNF32-AS2	0.684	2.192	0.555	0.595	0.73	Not
ZNF561-AS1	-0.466	7.078	-1.635	0.144	0.393	Not
LINC01694	-1.124	2.82	-0.617	0.555	0.696	Not
NR4A1AS	0.93	1.766	0.602	0.565	0.705	Not
LINC01277	0.672	2.544	0.528	0.613	0.743	Not
LINC02228	-0.789	2.106	-0.568	0.587	0.724	Not
CDH3-AS1	-1.31	3.083	-0.664	0.527	0.676	Not
F11-AS1	-0.806	2.179	-0.56	0.592	0.729	Not
LIX1L-AS1	0.459	2.477	0.519	0.619	0.748	Not
LINC02818	0.978	3.101	0.594	0.57	0.708	Not
RBM26-AS1	1.071	2.184	0.552	0.597	0.732	Not
VIPR1-AS1	0.762	1.337	0.653	0.533	0.678	Not
LINC00880	0.774	4.491	0.967	0.364	0.552	Not
UVRAG-DT	0.67	2.295	0.521	0.617	0.747	Not
JTB-DT	0.473	8.407	1.849	0.105	0.324	Not
CCDC88C-DT	-0.959	5.425	-1.207	0.265	0.521	Not
LINC00592	0.561	3.119	0.551	0.598	0.732	Not
LINC01555	-1.013	2.767	-0.565	0.589	0.725	Not
HOXC13-AS	-0.436	8.602	-1.875	0.101	0.317	Not
MAD2L1-DT	0.659	3.599	0.691	0.511	0.662	Not
FN1-DT	-0.721	3.348	-0.63	0.547	0.69	Not
LINC00896	-2.966	8.082	-1.691	0.132	0.374	Not
LINC01931	1.043	3.946	0.787	0.456	0.618	Not
FLG-AS1	-0.543	2.684	-0.505	0.628	0.755	Not
NUP107-DT	0.773	4.516	0.961	0.367	0.552	Not
UFL1-AS1	0.569	4.137	0.853	0.42	0.591	Not
MIF-AS1	1.417	3.336	0.637	0.544	0.686	Not
DDX11-AS1	0.339	8.872	1.917	0.094	0.304	Not
LINC01504	0.613	2.173	0.503	0.63	0.756	Not
LINC02482	0.551	6.648	1.54	0.165	0.427	Not
ZNF451-AS1	0.544	4.441	0.937	0.378	0.559	Not
HCP5B	-0.873	2.6	-0.513	0.623	0.751	Not
PIGY-DT	-0.746	2.09	-0.514	0.622	0.751	Not
ROR1-AS1	0.655	1.145	0.648	0.537	0.68	Not
LINC01500	0.744	1.435	0.598	0.567	0.706	Not
GABPB1-AS1	-2.252	10.462	-2.113	0.07	0.261	Not
CENPN-AS1	0.654	2.524	0.456	0.662	0.781	Not
OR2A1-AS1	0.536	3.923	0.773	0.463	0.624	Not
SLC9A3R1-AS1	0.866	4.937	1.068	0.319	0.521	Not
SPATA41	0.864	2.77	0.47	0.652	0.776	Not
VLDLR-AS1	-0.56	4.104	-0.818	0.439	0.605	Not
LINC02208	-0.602	1.511	-0.574	0.583	0.72	Not
A1BG-AS1	-0.62	6.336	-1.444	0.19	0.465	Not
LINC01389	0.906	2.127	0.482	0.644	0.768	Not
LIX1-AS1	-0.966	4.973	-1.057	0.324	0.526	Not
KLHL30-AS1	1.127	4.353	0.885	0.404	0.576	Not
APCDD1L-DT	-0.599	5.116	-1.113	0.301	0.521	Not
LINC00622	0.676	2.322	0.451	0.665	0.784	Not
HOXC-AS1	0.591	6.97	1.591	0.153	0.409	Not
GNA15-DT	0.871	2.03	0.488	0.64	0.765	Not
LINC01273	0.599	5.566	1.25	0.249	0.521	Not
PCF11-AS1	0.918	9.808	2.048	0.078	0.273	Not
LINC02340	-0.608	3.1	-0.52	0.618	0.747	Not
DHX33-DT	0.835	3.166	0.519	0.619	0.748	Not
LINC02985	0.809	1.836	0.507	0.627	0.754	Not
LINC01322	-0.755	2.427	-0.462	0.657	0.779	Not
LINC02609	-0.598	3.981	-0.767	0.467	0.626	Not
SIRLNT	-0.701	1.849	-0.509	0.626	0.753	Not
CBR4-DT	0.636	2.847	0.434	0.677	0.792	Not
LINC00607	-0.613	2.616	-0.447	0.667	0.786	Not
LINC01088	-0.813	3.748	-0.682	0.516	0.666	Not
ZBTB44-DT	0.636	2.669	0.417	0.688	0.802	Not
GRPEL2-AS1	0.718	2.987	0.458	0.66	0.78	Not
TTC28-AS1	0.405	7.086	1.608	0.15	0.403	Not
CEP72-DT	0.811	5.426	1.198	0.268	0.521	Not
FAS	-2.091	5.247	-1.05	0.327	0.527	Not
LINC00494	-0.66	1.93	-0.48	0.645	0.77	Not
LINC01091	-0.632	2.031	-0.465	0.655	0.778	Not
HCG14	0.828	3.17	0.503	0.629	0.756	Not
FAM230B	-0.524	0.806	-0.655	0.532	0.677	Not
MIR548XHG	-0.524	0.806	-0.655	0.532	0.677	Not
CDKN2A-DT	-0.524	0.806	-0.655	0.532	0.677	Not
LINC02962	-0.524	0.806	-0.655	0.532	0.677	Not
LINC01732	-0.524	0.806	-0.655	0.532	0.677	Not
LINC02226	-0.524	0.806	-0.655	0.532	0.677	Not
LINC02120	-0.524	0.806	-0.655	0.532	0.677	Not
LINC02451	-0.524	0.806	-0.655	0.532	0.677	Not
LNCOG	-0.524	0.806	-0.655	0.532	0.677	Not
LINC02444	-0.524	0.806	-0.655	0.532	0.677	Not
CTDSPL2-DT	-0.524	0.806	-0.655	0.532	0.677	Not
BMS1P14	-0.524	0.806	-0.655	0.532	0.677	Not
DNAJA4-DT	0.641	1.281	0.578	0.58	0.719	Not
TEX41	0.332	2.669	0.385	0.711	0.818	Not
DLGAP1-AS1	0.75	6.114	1.387	0.206	0.492	Not
LINC01873	-1.062	3.052	-0.538	0.606	0.735	Not
XIST	0.637	2.89	0.416	0.689	0.802	Not
PAXIP1-AS2	-0.37	8.236	-1.792	0.114	0.342	Not
CARHSP1-DT	0.637	1.281	0.575	0.583	0.72	Not
LINC00973	1.236	4.693	0.965	0.365	0.552	Not
RC3H1-DT	0.558	4.624	0.958	0.368	0.553	Not
RUNDC3A-AS1	-0.551	6.749	-1.527	0.168	0.432	Not
INTS6L-AS1	0.726	1.67	0.504	0.629	0.755	Not
LINC00887	-0.52	5.631	-1.247	0.251	0.521	Not
LINC01618	-0.675	2.376	-0.42	0.686	0.8	Not
LINC03036	-0.576	2.654	-0.408	0.695	0.807	Not
UHRF1BP1L-DT	0.711	1.664	0.495	0.635	0.761	Not
LINC02882	-0.545	2.919	-0.435	0.676	0.792	Not
NUP50-DT	0.522	7.479	1.666	0.137	0.382	Not
LINC00640	-0.835	3.909	-0.71	0.5	0.652	Not
LINC01429	1.069	3.216	0.509	0.625	0.753	Not
LINC02334	-0.653	4.079	-0.769	0.465	0.626	Not
LINC01003	0.448	8.451	1.822	0.109	0.333	Not
SEPTIN9-DT	0.803	5.563	1.224	0.258	0.521	Not
PAPOLA-DT	0.406	8.469	1.823	0.109	0.333	Not
LINC01807	-0.695	2.618	-0.395	0.704	0.815	Not
SMAD5-AS1	-0.602	2.268	-0.386	0.711	0.818	Not
ZNF888-AS1	-0.602	2.268	-0.386	0.711	0.818	Not
TMEM242-DT	-0.743	3.403	-0.544	0.602	0.734	Not
LINC02984	-0.62	2.355	-0.381	0.714	0.821	Not
LINC01876	-0.599	4.336	-0.844	0.425	0.592	Not
CCDC90B-AS1	0.541	4.809	0.997	0.35	0.541	Not
LINC02360	0.665	1.639	0.472	0.65	0.774	Not
NEMP2-DT	-0.445	9.323	-1.951	0.09	0.298	Not
PTENP1-AS	-0.68	7.232	-1.603	0.151	0.405	Not
LINC02899	-1.537	3.761	-0.644	0.539	0.683	Not
LINC01768	-0.653	3.032	-0.421	0.686	0.8	Not
LINC02958	-0.489	1.895	-0.413	0.691	0.804	Not
NRAD1	0.371	2.338	0.329	0.751	0.845	Not
LARP4B-DT	-0.627	2.246	-0.361	0.728	0.829	Not
RB1-DT	-0.626	2.967	-0.407	0.695	0.807	Not
RIPOR3-AS1	0.582	1.505	0.479	0.646	0.77	Not
LINC01404	-0.461	2.783	-0.347	0.738	0.836	Not
LNMICC	-0.798	5.011	-1.03	0.335	0.534	Not
LINC00636	0.589	1.696	0.438	0.674	0.791	Not
DIRC3	-0.596	2.1	-0.372	0.72	0.823	Not
LINC01714	0.697	4.775	0.974	0.361	0.552	Not
RARB	0.541	3	0.35	0.736	0.834	Not
LINC01118	0.772	5.077	1.062	0.322	0.524	Not
OVCH1-AS1	0.481	8.007	1.737	0.124	0.361	Not
CAMSAP1-DT	0.646	2.378	0.308	0.767	0.857	Not
APPBP2-DT	0.5	2.11	0.346	0.739	0.836	Not
LINC01983	-0.469	0.78	-0.601	0.566	0.705	Not
GOSR2-DT	-0.677	4.822	-0.969	0.363	0.552	Not
SPCS3-AS1	-0.867	3.383	-0.498	0.633	0.759	Not
ST3GAL6-AS1	0.54	1.22	0.513	0.623	0.751	Not
THBS4-AS1	-0.408	2.887	-0.317	0.76	0.851	Not
TMEM18-DT	-0.439	2.477	-0.282	0.786	0.87	Not
FBXO36-IT1	-0.618	4.953	-1.006	0.346	0.537	Not
[truncated: 1,113 more rows]
