# Supplementary material for: Effects of BRD4 inhibitor JQ1 on the expression profile of super-enhancer related lncRNAs and mRNAs in cervical cancer HeLa cells
Source: PeerJ. 2024 Feb 23;12:e17035. doi: 10.7717/peerj.17035 (PMC10896078; doi:10.7717/peerj.17035)
Supplement: Supplemental Information 7 [file peerj-12-17035-s007.xlsx]

## Sheet: Supplementary Table S3
Supplementary Table S3 | Differentially expressed mRNAs identified from correlation analysis with SE-lncRNAs
Genes	logFC	AveExpr	t	PValue	FDR	diffsig
FAM171A1	-2.676	5.911	-25.33	<0.001	0.001	Down
CSPG4	-3.461	5.859	-23.759	<0.001	0.001	Down
CLMP	-2.134	6.667	-22.55	<0.001	0.001	Down
ZBTB38	-3.335	4.691	-25.442	<0.001	0.001	Down
COL15A1	-2.297	5.378	-22.399	<0.001	0.001	Down
THRA	-2.152	5.829	-21.689	<0.001	0.001	Down
MYL9	-2.92	4.304	-23.331	<0.001	0.001	Down
LAMB3	-2.103	5.801	-20.445	<0.001	0.001	Down
PLK2	-6.145	5.583	-22.577	<0.001	0.001	Down
SPTBN2	-2.522	5.945	-19.574	<0.001	0.001	Down
MAMDC2	-2.612	4.913	-20.193	<0.001	0.001	Down
TRIM29	-3.401	3.711	-23.888	<0.001	0.001	Down
KCNC4	-3.029	3.914	-21.261	<0.001	0.001	Down
GBP1	-2.602	4.977	-18.369	<0.001	0.001	Down
PCSK1	-2.37	4.475	-18.475	<0.001	0.001	Down
GSTO2	-3.195	4.125	-18.479	<0.001	0.001	Down
KRT19	-2.335	5.378	-16.712	<0.001	0.001	Down
MYO5C	-2.451	4.743	-17.013	<0.001	0.001	Down
COL3A1	-3.676	6.199	-16.128	<0.001	0.001	Down
ANXA10	-2.157	4.884	-16.217	<0.001	0.001	Down
B4GALNT4	-3.399	5.006	-16.169	<0.001	0.001	Down
IFITM2	-2.664	4.701	-16.046	<0.001	0.001	Down
ASIC1	-2.683	3.891	-16.653	<0.001	0.001	Down
RASL10B	-3.317	4.314	-16.186	<0.001	0.001	Down
ATOH8	-3.219	3.367	-16.581	<0.001	0.001	Down
SLC44A2	-2.962	4.287	-15.369	<0.001	0.001	Down
SAMD10	-2.74	3.772	-15.706	<0.001	0.001	Down
ZHX2	-2.333	4.572	-14.937	<0.001	0.001	Down
LRP1	-2.495	5.724	-14.681	<0.001	0.001	Down
DTX4	-2.026	4.942	-14.768	<0.001	0.001	Down
ACKR3	-2.173	5.717	-14.643	<0.001	0.001	Down
HSD3B7	-2.74	3.208	-15.948	<0.001	0.001	Down
E2F2	-3.408	5.232	-14.535	<0.001	0.001	Down
GREM1	-3.161	4.256	-14.43	<0.001	0.001	Down
ALDH1A3	-2.223	5.672	-13.784	<0.001	0.002	Down
CYP27C1	-2.412	3	-14.981	<0.001	0.001	Down
TNFSF10	-2.538	4.172	-13.984	<0.001	0.002	Down
CDC42BPG	-3.764	4.161	-14.155	<0.001	0.002	Down
DENND2D	-2.803	4.05	-14.04	<0.001	0.002	Down
SALL4	-2.699	3.331	-14.322	<0.001	0.001	Down
SORBS3	-2.289	4.478	-13.494	<0.001	0.002	Down
SYNPO	-2.75	5.153	-13.001	<0.001	0.002	Down
PRRX1	-2.749	2.642	-14.57	<0.001	0.001	Down
S1PR2	-2.395	3.915	-12.55	<0.001	0.002	Down
CA9	-4.27	3.052	-13.734	<0.001	0.002	Down
FBXL16	-2.648	3.747	-12.175	<0.001	0.002	Down
TNS2	-2.227	3.847	-12.113	<0.001	0.002	Down
IGFBP5	-2.388	3.25	-12.311	<0.001	0.002	Down
CTXN1	-2.315	5.806	-11.821	<0.001	0.002	Down
DSC2	-2.061	3.243	-12.036	<0.001	0.002	Down
LAMC3	-2.531	3.988	-11.661	<0.001	0.002	Down
NPR1	-3.08	3.619	-11.789	<0.001	0.002	Down
TBKBP1	-3.521	2.621	-13.092	<0.001	0.002	Down
MYPN	-3.479	2.363	-13.655	<0.001	0.002	Down
PCDHB14	-2.171	3.5	-11.561	<0.001	0.002	Down
CYB561	-2.269	2.609	-11.917	<0.001	0.002	Down
JPH3	-2.548	4.21	-11.27	<0.001	0.002	Down
SNTB1	-2.039	2.922	-11.541	<0.001	0.002	Down
NAV1	-2.004	5.443	-11.104	<0.001	0.003	Down
KIAA1522	-2.046	7.051	-11.309	<0.001	0.002	Down
ADCY7	-2.306	2.889	-11.107	<0.001	0.003	Down
JPH2	-2.01	5.848	-10.93	<0.001	0.003	Down
SNCG	-5.284	3.381	-11.801	<0.001	0.002	Down
IL27RA	-3.219	3.068	-10.918	<0.001	0.003	Down
CC2D2A	-3.994	2.148	-13.274	<0.001	0.002	Down
PAPPA2	-2.993	3.019	-10.804	<0.001	0.003	Down
CA11	-4.212	3.917	-10.589	<0.001	0.003	Down
N4BP3	-2.047	4.966	-10.415	<0.001	0.003	Down
PCDHB13	-2.304	3.097	-10.472	<0.001	0.003	Down
ADGRF4	-2.562	2.021	-11.266	<0.001	0.002	Down
PWWP2B	-2.139	4.662	-10.196	<0.001	0.003	Down
ISLR	-3.646	2.408	-11.328	<0.001	0.002	Down
TLR3	-3.283	2.895	-10.235	<0.001	0.003	Down
IL1A	-2.073	4.481	-9.83	<0.001	0.004	Down
SLC16A9	-2.421	3.5	-9.682	<0.001	0.004	Down
SH2D3A	-2.029	2.827	-9.728	<0.001	0.004	Down
VIT	-3.894	1.811	-12.154	<0.001	0.002	Down
TP63	-3.199	2.024	-10.763	<0.001	0.003	Down
MEX3A	-2.321	5.564	-9.721	<0.001	0.004	Down
SRC	-2.983	2.793	-9.712	<0.001	0.004	Down
ACSL5	-2.919	2.221	-10.127	<0.001	0.003	Down
TMEM184A	-2.227	2.872	-9.52	<0.001	0.004	Down
SLC12A8	-3.496	3.44	-9.475	<0.001	0.004	Down
MTSS2	-3.897	3.047	-9.305	<0.001	0.004	Down
CRMP1	-3.395	1.803	-10.362	<0.001	0.003	Down
MRAP2	-2.543	2.471	-9.197	<0.001	0.004	Down
COMMD7	-2.351	3.922	-9.013	<0.001	0.004	Down
DIO2	-2.783	3.902	-9.005	<0.001	0.004	Down
LRP3	-2.815	2.459	-9	<0.001	0.004	Down
NYNRIN	-2.328	1.822	-9.273	<0.001	0.004	Down
MISP	-2.198	7.697	-9.359	<0.001	0.004	Down
HSF2BP	-3.101	2.196	-8.974	<0.001	0.004	Down
SHKBP1	-2.165	2.645	-8.597	<0.001	0.005	Down
IFI44L	-3.28	3.707	-8.55	<0.001	0.005	Down
PDE4A	-3.129	2.102	-8.998	<0.001	0.004	Down
UFC1	-2.188	5.5	-8.68	<0.001	0.005	Down
IL7R	-5.003	2.4	-9.375	<0.001	0.004	Down
PTCHD4	-3.808	2.069	-9.084	<0.001	0.004	Down
SCNN1A	-3.138	3.933	-8.288	<0.001	0.005	Down
PRLR	-2.433	2.212	-8.373	<0.001	0.005	Down
FAM131C	-2.916	1.658	-8.813	<0.001	0.005	Down
PDLIM2	-3.234	1.167	-9.701	<0.001	0.004	Down
PALMD	-2.605	2.637	-8.082	<0.001	0.006	Down
FSIP2	-2.474	5.823	-8.292	<0.001	0.005	Down
UNC13D	-3.781	3.328	-7.936	<0.001	0.006	Down
LAMA1	-5.197	2.498	-8.416	<0.001	0.005	Down
CGREF1	-3.769	1.102	-9.51	<0.001	0.004	Down
SIRPA	-2.6	1.691	-8.074	<0.001	0.006	Down
STEAP4	-2.935	1.386	-8.412	<0.001	0.005	Down
CYB5RL	-4.45	1.91	-8.475	<0.001	0.005	Down
PDGFB	-2.033	3.04	-7.624	<0.001	0.007	Down
EEF1AKMT3	-2.018	3.362	-7.625	<0.001	0.007	Down
ALS2CL	-3.253	4.032	-7.63	<0.001	0.007	Down
RYR2	-3.639	2.092	-7.842	<0.001	0.006	Down
DCN	-2.6	1.082	-8.236	<0.001	0.006	Down
CBLN3	-2.108	1.732	-7.617	<0.001	0.007	Down
PKP3	-2.236	3.894	-7.495	<0.001	0.007	Down
UGT1A7	-3.988	1.469	-8.332	<0.001	0.005	Down
TP53I11	-3.465	0.652	-9.307	<0.001	0.004	Down
TIGD7	-2.026	3.583	-7.408	<0.001	0.007	Down
OASL	-2.188	1.838	-7.414	<0.001	0.007	Down
ADGRL1	-3.253	2.103	-7.467	<0.001	0.007	Down
NPY4R	-4.391	0.941	-9.408	<0.001	0.004	Down
NIPAL4	-2.93	2.963	-7.3	<0.001	0.008	Down
CASKIN1	-2.131	3.9	-7.358	<0.001	0.008	Down
BDKRB2	-2.245	1.446	-7.263	<0.001	0.008	Down
HRCT1	-3.312	1.657	-7.242	<0.001	0.008	Down
KRT80	-3.722	7.746	-7.555	<0.001	0.007	Down
EEF1A2	-2.745	3.981	-6.944	<0.001	0.009	Down
C4BPB	-2.093	0.936	-7.22	<0.001	0.008	Down
ALDH3B1	-3.442	3.581	-6.82	<0.001	0.009	Down
APOL1	-3.354	0.849	-7.579	<0.001	0.007	Down
SCMH1	-3.777	2.099	-6.811	<0.001	0.009	Down
PDZD2	-2.441	4.542	-6.862	<0.001	0.009	Down
TSPAN1	-2.47	3.477	-6.709	<0.001	0.01	Down
GRM1	-4.886	0.29	-9.988	<0.001	0.003	Down
SPINK4	-2.124	3.13	-6.604	<0.001	0.01	Down
NPY4R2	-3.671	1.617	-6.808	<0.001	0.009	Down
PALD1	-2.256	3.489	-6.595	<0.001	0.01	Down
CPNE7	-3.194	1.604	-6.68	<0.001	0.01	Down
CSDC2	-2.876	1.487	-6.606	<0.001	0.01	Down
PDE1A	-2.447	2.86	-6.429	<0.001	0.011	Down
TEK	-3.494	0.289	-7.6	<0.001	0.007	Down
COMTD1	-2.282	2.069	-6.329	<0.001	0.012	Down
C1orf116	-2.212	4.883	-6.557	<0.001	0.011	Down
SALL2	-3.328	0.313	-7.08	<0.001	0.009	Down
RIMS4	-2.276	2.167	-6.135	0.001	0.013	Down
KAZALD1	-2.144	3.881	-6.28	0.001	0.012	Down
RBP1	-2.481	0.307	-6.712	<0.001	0.01	Down
MAPK3	-3.132	2.028	-6.094	0.001	0.013	Down
IMPDH1	-2.07	3.897	-6.226	0.001	0.013	Down
SEC61A2	-2.649	1.022	-6.275	0.001	0.012	Down
ANGPTL2	-2.35	2.179	-5.971	0.001	0.014	Down
EPCAM	-2.708	1.29	-5.982	0.001	0.014	Down
DTHD1	-2.625	2.165	-5.854	0.001	0.015	Down
TBXA2R	-2.025	3.063	-5.914	0.001	0.015	Down
C1S	-2.855	2.18	-5.763	0.002	0.016	Down
CTSS	-3.181	0.857	-5.996	0.001	0.014	Down
GPX7	-2.193	2.171	-5.72	0.002	0.016	Down
PCDHGA10	-2.431	1.396	-5.745	0.002	0.016	Down
NBPF4	-2.336	0.33	-6.042	0.001	0.014	Down
SMC1B	-2.129	1.894	-5.63	0.002	0.017	Down
NIPAL2	-2.377	1.765	-5.586	0.002	0.018	Down
LRRC3	-2.406	1.597	-5.549	0.002	0.018	Down
GALC	-2.234	0.511	-5.754	0.002	0.016	Down
SPOCD1	-2.801	0.394	-5.886	0.001	0.015	Down
SYNC	-2.089	1.74	-5.527	0.002	0.018	Down
DAG1	-3.163	6.724	-6.117	0.001	0.013	Down
TGFB1I1	-3.287	3.569	-5.614	0.002	0.017	Down
TLE5	-2.281	3.671	-5.632	0.002	0.017	Down
PLEKHA4	-2.022	0.744	-5.525	0.002	0.018	Down
PDGFRB	-2.54	1.034	-5.455	0.002	0.019	Down
NOTUM	-2.184	0.817	-5.442	0.002	0.019	Down
PCDHB11	-2.358	1.094	-5.395	0.002	0.019	Down
IFITM1	-2.416	1.135	-5.356	0.002	0.02	Down
PCDHGA6	-2.827	0.242	-5.617	0.002	0.017	Down
ABCA12	-2.438	0.54	-5.407	0.002	0.019	Down
GRIN3B	-2.69	1.465	-5.243	0.002	0.021	Down
HTR1D	-2.23	5.639	-5.72	0.002	0.016	Down
PARP10	-2.895	2.415	-5.147	0.003	0.022	Down
ICOSLG	-3.088	1.488	-5.11	0.003	0.023	Down
S100A3	-4.545	1.312	-5.217	0.003	0.021	Down
CNKSR1	-2.271	1.993	-5.085	0.003	0.023	Down
PLAC8L1	-2.028	3.305	-5.19	0.003	0.022	Down
LIMS2	-2.843	0.187	-5.184	0.003	0.022	Down
UROD	-2.052	3.468	-5.16	0.003	0.022	Down
CUX1	-2.114	4.289	-5.26	0.002	0.021	Down
IFI44	-2.127	2.432	-5.015	0.003	0.024	Down
GAREM2	-2.015	1.131	-4.866	0.004	0.026	Down
H2AC7	-2.214	1.806	-4.857	0.004	0.026	Down
FIZ1	-2.091	2.146	-4.893	0.003	0.026	Down
MMRN2	-2.699	0.676	-4.892	0.003	0.026	Down
TAGLN	-2.829	1.075	-4.817	0.004	0.027	Down
TCEA3	-2.907	0.086	-4.98	0.003	0.024	Down
NBPF6	-2.206	0.993	-4.747	0.004	0.028	Down
CCDC102A	-2.085	2.751	-4.872	0.003	0.026	Down
NCKAP5	-2.8	-0.314	-5.043	0.003	0.024	Down
WHRN	-2.177	2.933	-4.854	0.004	0.026	Down
KCTD15	-2.094	2.943	-4.843	0.004	0.027	Down
SLC2A5	-2.317	-0.636	-5.062	0.003	0.023	Down
AGBL1	-2.25	0.41	-4.711	0.004	0.029	Down
TENM2	-7.038	-1.895	-9.139	<0.001	0.004	Down
NFATC4	-3.13	-0.703	-5.181	0.003	0.022	Down
CHD1L	-5.523	0.674	-4.976	0.003	0.025	Down
SHOC1	-2.564	-0.451	-4.871	0.004	0.026	Down
PCDHGA7	-3.211	0.484	-4.631	0.004	0.031	Down
POC1B-GALNT4	-9.302	0.038	-7.978	<0.001	0.006	Down
ADAMTS8	-6.323	-2.249	-8.408	<0.001	0.005	Down
ZBTB2	-5.6	4.184	-4.658	0.004	0.03	Down
MFAP2	-3.28	3.321	-4.655	0.004	0.03	Down
TET1	-2.319	0.534	-4.46	0.005	0.034	Down
SPATA12	-6.336	-2.245	-7.148	<0.001	0.008	Down
PCP2	-6.425	-2.199	-7.027	<0.001	0.009	Down
SPACA9	-2.023	1.985	-4.394	0.006	0.036	Down
GIPC3	-5.983	0.587	-4.639	0.004	0.03	Down
TMEM54	-2.32	0.682	-4.302	0.006	0.038	Down
ROS1	-5.588	-0.213	-4.936	0.003	0.025	Down
GALNT5	-4.897	-0.062	-4.658	0.004	0.03	Down
NFATC1	-2.01	0.953	-4.263	0.006	0.039	Down
ARHGEF16	-5.979	0.824	-4.498	0.005	0.033	Down
MVB12B	-2.501	0.013	-4.261	0.006	0.039	Down
MYO16	-6.522	-2.154	-6.263	0.001	0.012	Down
TRIM46	-7.676	-1.57	-6.066	0.001	0.014	Down
MORN4	-3.2	3.584	-4.419	0.005	0.035	Down
TSPOAP1	-5.843	-1.434	-5.901	0.001	0.015	Down
CLDN7	-5.046	-2.892	-6.539	<0.001	0.011	Down
EDAR	-5.54	-2.645	-6.3	0.001	0.012	Down
FLT3LG	-2.433	-0.308	-4.2	0.007	0.041	Down
VPS52	-2.298	5.986	-4.766	0.004	0.028	Down
DUOX1	-4.714	0.131	-4.223	0.007	0.04	Down
ATP1A2	-6.142	-2.339	-5.81	0.002	0.016	Down
FMN2	-2.452	0.776	-4.02	0.008	0.046	Down
CATSPER1	-6.6	-2.12	-5.67	0.002	0.017	Down
ADAMTS10	-2.221	3.373	-4.316	0.006	0.038	Down
PCDHGB6	-4.848	-2.987	-6.067	0.001	0.014	Down
PALM	-3.38	1.926	-4.005	0.008	0.046	Down
NFE2	-5.491	-2.673	-5.727	0.002	0.016	Down
EVPLL	-6.485	-0.199	-4.574	0.005	0.032	Down
OLFM4	-5.048	-2.894	-5.847	0.001	0.015	Down
SPEG	-2.256	0.141	-3.978	0.009	0.047	Down
LRFN1	-6.367	-0.501	-4.699	0.004	0.029	Down
TICAM2	-11.316	0.247	-5.231	0.003	0.021	Down
TRIM22	-4.456	-0.368	-4.144	0.007	0.042	Down
CDH3	-5.605	-1.384	-4.979	0.003	0.024	Down
ANXA8L1	-4.238	0.408	-3.929	0.009	0.049	Down
GPM6B	-6.006	-2.409	-5.219	0.003	0.021	Down
GALNTL6	-5.757	-2.54	-5.222	0.003	0.021	Down
ACTL8	-4.85	-2.989	-5.399	0.002	0.019	Down
PLAAT4	-5.331	-2.739	-5.254	0.002	0.021	Down
KRT13	-6.701	-2.068	-5.043	0.003	0.024	Down
VSTM5	-5.914	-2.463	-5.108	0.003	0.023	Down
ALPP	-6.511	-0.142	-4.261	0.006	0.039	Down
PTPRQ	-5.187	-2.819	-5.171	0.003	0.022	Down
TMEM151B	-4.697	-3.071	-5.249	0.002	0.021	Down
LGSN	-5.318	-2.763	-5.092	0.003	0.023	Down
GLI1	-5.718	-1.607	-4.859	0.004	0.026	Down
ZAR1	-5.013	-2.911	-5.089	0.003	0.023	Down
CTNNA2	-5.145	-1.753	-4.759	0.004	0.028	Down
MMP2	-2.111	5.44	-4.359	0.006	0.037	Down
HSBP1L1	-2.672	3.226	-4.024	0.008	0.046	Down
METTL7B	-6.761	0.599	-3.905	0.009	0.05	Down
PSG5	-4.634	-3.095	-5	0.003	0.024	Down
TGIF2-RAB5IF	-8.105	-1.364	-4.598	0.005	0.031	Down
SBSPON	-4.891	-2.969	-4.84	0.004	0.027	Down
ZNF532	-2.667	3.737	-4.029	0.008	0.046	Down
USP43	-6.303	-0.645	-4.146	0.007	0.042	Down
C3orf33	-5.568	-0.716	-3.994	0.008	0.047	Down
UGT1A1	-5.45	-2.683	-4.568	0.005	0.032	Down
VWA7	-5.714	-0.823	-4.022	0.008	0.046	Down
C17orf113	-5.553	-1.057	-4.08	0.008	0.044	Down
KRT8	-3.253	7.083	-4.44	0.005	0.035	Down
PCDHGB2	-4.968	-1.358	-4.059	0.008	0.045	Down
LRMDA	-4.855	-1.881	-4.321	0.006	0.038	Down
MRGPRE	-4.476	-3.176	-4.609	0.005	0.031	Down
PCDHGA5	-4.81	-1.912	-4.273	0.006	0.038	Down
RASSF2	-4.539	-3.14	-4.533	0.005	0.033	Down
TXLNB	-4.795	-1.494	-3.926	0.009	0.049	Down
GSAP	-4.761	-1.676	-3.97	0.009	0.047	Down
YOD1	-2.371	6.377	-4.248	0.006	0.039	Down
QSER1	-4.128	5.715	-4.067	0.008	0.044	Down
WFDC2	-5.553	-2.624	-4.167	0.007	0.041	Down
PRH2	-4.405	-3.217	-4.299	0.006	0.038	Down
ZC3HAV1L	-8.17	-1.322	-3.922	0.009	0.049	Down
PCDHGA4	-5.347	-2.725	-3.972	0.009	0.047	Down
SRD5A1	-2.228	6.655	-4.191	0.007	0.041	Down
H1-0	2.117	10.374	33.698	<0.001	0.001	Up
DUSP6	3.064	6.85	35.945	<0.001	0.001	Up
NQO1	2.081	8.395	29.762	<0.001	0.001	Up
PAG1	2.812	5.993	25.324	<0.001	0.001	Up
EIF5B	3.039	6.784	24.042	<0.001	0.001	Up
ANO3-AS1	2.155	6.35	23.975	<0.001	0.001	Up
GRPEL2	4.043	5.556	19.914	<0.001	0.001	Up
OSGIN1	2.656	5.035	17.913	<0.001	0.001	Up
KCNJ2	2.257	4.973	16.195	<0.001	0.001	Up
NRIP3	2.308	4.299	13.705	<0.001	0.002	Up
BSN	2.581	4.578	12.966	<0.001	0.002	Up
CXCL8	2.322	3.985	12.924	<0.001	0.002	Up
NPTXR	3.547	2.574	14.172	<0.001	0.002	Up
EGR1	2.48	6.868	12.419	<0.001	0.002	Up
FAM222A	2.291	3.851	12.045	<0.001	0.002	Up
SERPINI1	2.062	3.377	12.116	<0.001	0.002	Up
YPEL1	3.528	2.949	12.471	<0.001	0.002	Up
SH3GL2	2.039	4.743	11.586	<0.001	0.002	Up
MARCHF3	2.112	3.465	11.466	<0.001	0.002	Up
EFR3B	5.232	2.624	14.344	<0.001	0.001	Up
HEY2	2.174	2.361	9.734	<0.001	0.004	Up
SERTAD1	2.819	4.757	9.388	<0.001	0.004	Up
CRISPLD2	4.075	1.333	11.984	<0.001	0.002	Up
CTSV	2.047	3.494	8.802	<0.001	0.005	Up
CDH19	2.184	2.514	8.637	<0.001	0.005	Up
ENPP1	2.666	5.083	8.497	<0.001	0.005	Up
ADCY1	2.666	1.454	8.893	<0.001	0.004	Up
BAIAP3	2.93	1.316	9.16	<0.001	0.004	Up
TENM1	2.294	2.158	7.785	<0.001	0.007	Up
MGAT4A	2.371	1.796	7.874	<0.001	0.006	Up
KIAA0319	2.023	2.371	7.578	<0.001	0.007	Up
CSGALNACT1	3.5	0.836	8.638	<0.001	0.005	Up
P2RY4	2.452	1.644	7.51	<0.001	0.007	Up
STOX1	3.264	1.797	7.476	<0.001	0.007	Up
CLDN9	4.096	1.839	7.649	<0.001	0.007	Up
NR5A2	2.669	0.801	8.04	<0.001	0.006	Up
MAP1A	2.617	4.553	7.332	<0.001	0.008	Up
FEZ2	2.164	4.453	7.285	<0.001	0.008	Up
EEPD1	2.209	4.008	7.152	<0.001	0.008	Up
ABCB1	2.023	3.903	7.081	<0.001	0.009	Up
MAN1C1	2.016	1.536	6.895	<0.001	0.009	Up
PPM1J	2.022	2.051	6.681	<0.001	0.01	Up
GTF2F2	8.626	2.057	9.172	<0.001	0.004	Up
COL4A5	2.559	5.294	6.767	<0.001	0.01	Up
DDX6	2.154	5.389	6.682	<0.001	0.01	Up
IRF7	2.581	0.537	6.696	<0.001	0.01	Up
SHC4	2.625	0.33	6.841	<0.001	0.009	Up
B3GALT1	2.254	1.654	6.186	0.001	0.013	Up
MIER3	3.856	3.463	6.211	0.001	0.013	Up
CLIP3	2.257	2.062	6.094	0.001	0.013	Up
NSFL1C	2.504	4.951	6.349	<0.001	0.012	Up
MT-ATP6	14.947	3.72	18.683	<0.001	0.001	Up
MMP1	8.306	1.816	7.506	<0.001	0.007	Up
DACT3	5.585	0.07	8.228	<0.001	0.006	Up
SIRT1	2.828	4.302	6.089	0.001	0.013	Up
GJA3	3.985	0.779	6.168	0.001	0.013	Up
MDGA1	5.16	-0.247	8.044	<0.001	0.006	Up
SLC38A5	2.04	2.951	5.812	0.002	0.016	Up
HAL	2.383	0.688	5.813	0.002	0.016	Up
RGL1	4.814	2.433	5.661	0.002	0.017	Up
FGFR3	6.37	-0.075	8.964	<0.001	0.004	Up
TMEM171	2.317	0.946	5.655	0.002	0.017	Up
SCARF2	2.702	0.87	5.642	0.002	0.017	Up
PIP5K1B	3.171	0.272	5.842	0.001	0.015	Up
ANO3	4.222	-0.634	7.118	<0.001	0.008	Up
AGTR1	4.791	-0.652	7.611	<0.001	0.007	Up
SORBS1	5.587	0.366	6.306	0.001	0.012	Up
SLC29A4	3.391	0.268	5.675	0.002	0.017	Up
OTUD7A	2.175	0.652	5.178	0.003	0.022	Up
THAP8	2.005	3.396	5.32	0.002	0.02	Up
SDHAF2	2.057	2.746	5.2	0.003	0.022	Up
USP54	2.001	3.067	5.157	0.003	0.022	Up
POLR2J3	3.907	3.202	5.066	0.003	0.023	Up
NFYA	2.081	2.486	5.044	0.003	0.024	Up
PPP1R14C	3.525	-0.804	5.754	0.002	0.016	Up
ANGPTL6	4.103	-0.71	5.842	0.001	0.015	Up
MYO1D	3.078	-0.555	5.323	0.002	0.02	Up
SYTL2	2.131	0.355	4.857	0.004	0.026	Up
ATP1B2	2.466	3.529	5.033	0.003	0.024	Up
ZNF419	2.497	0.189	4.834	0.004	0.027	Up
CABYR	2.147	-0.132	4.895	0.003	0.026	Up
PAX5	2.098	0.34	4.783	0.004	0.028	Up
ITGA2	2.253	8.808	5.961	0.001	0.014	Up
POU4F3	2.163	-0.443	4.928	0.003	0.025	Up
ZNF837	2.42	0.93	4.597	0.005	0.031	Up
SULT4A1	9.521	-0.299	8.097	<0.001	0.006	Up
DMXL2	2.382	4.934	5.016	0.003	0.024	Up
H3-7	2.601	1.627	4.562	0.005	0.032	Up
CYP4F11	3.43	0.061	4.669	0.004	0.03	Up
ATP1A3	6.35	-2.238	8.347	<0.001	0.005	Up
CRYL1	5.404	-1.499	6.673	<0.001	0.01	Up
PNPLA2	2.715	4.138	4.794	0.004	0.027	Up
AMOT	2.931	0.156	4.514	0.005	0.033	Up
IGF2	6.252	-1.412	7.043	<0.001	0.009	Up
LINC00640	3.644	4.342	4.761	0.004	0.028	Up
GPR146	2.528	1.051	4.396	0.006	0.036	Up
THEMIS2	4.411	-0.657	4.894	0.003	0.026	Up
TAS2R19	2.06	-0.735	4.536	0.005	0.033	Up
ENO4	5.077	-1.259	5.345	0.002	0.02	Up
CHRM4	2.768	0.011	4.305	0.006	0.038	Up
COL18A1	2.459	0.048	4.279	0.006	0.038	Up
PINLYP	3.074	-1.164	4.485	0.005	0.034	Up
HPCAL4	4.479	-0.826	4.493	0.005	0.033	Up
ROPN1L	4.522	-0.658	4.426	0.005	0.035	Up
LRP11	2.285	6.742	4.887	0.003	0.026	Up
NGFR	4.82	-0.431	4.335	0.006	0.037	Up
H1-6	5.407	-2.708	5.976	0.001	0.014	Up
LYRM9	2.514	-0.259	4.024	0.008	0.046	Up
ATP6AP1	2.384	5.867	4.653	0.004	0.03	Up
RADX	4.093	-0.999	4.354	0.006	0.037	Up
PGF	2.166	-0.475	4.014	0.008	0.046	Up
ABCG4	5.379	-2.725	5.662	0.002	0.017	Up
FAM217B	2.577	4.704	4.427	0.005	0.035	Up
MPL	2.28	0.109	3.908	0.009	0.05	Up
TLL2	4.507	-1.539	4.596	0.005	0.031	Up
DUSP5	2.034	7.138	4.779	0.004	0.028	Up
GARIN5B	5.139	-2.842	5.362	0.002	0.02	Up
TMEM39B	3.1	2.423	3.975	0.009	0.047	Up
APBA1	5.255	-1.738	4.806	0.004	0.027	Up
ABTB3	4.598	-1.297	4.273	0.006	0.038	Up
EPM2A	5.289	-1.503	4.545	0.005	0.032	Up
NECAB2	5.011	-2.042	4.882	0.003	0.026	Up
EWSR1	2.153	4.212	4.218	0.007	0.04	Up
WNT4	5.917	-2.458	4.943	0.003	0.025	Up
PPAN-P2RY11	3.694	3.54	4.06	0.008	0.045	Up
STK11	3.41	-1.214	3.968	0.009	0.047	Up
LIMS1	2.553	4.305	4.175	0.007	0.041	Up
FKBP2	5.418	-1.278	4.282	0.006	0.038	Up
RNF133	3.774	-1.433	4.054	0.008	0.045	Up
PIEZO1	2.604	6.904	4.527	0.005	0.033	Up
HRH3	5.163	-1.487	4.163	0.007	0.042	Up
SLC4A4	4.771	-1.437	4.026	0.008	0.046	Up
GP6	3.718	-1.573	3.923	0.009	0.049	Up
CDK5R2	5.023	-1.847	4.16	0.007	0.042	Up
RPL3L	4.07	-1.876	3.973	0.009	0.047	Up
KCNRG	4.494	-2.484	4.031	0.008	0.045	Up
IFNB1	4.792	-2.41	3.965	0.009	0.047	Up
H2BC9	2.051	6.776	4.074	0.008	0.044	Up
COL7A1	2.015	6.624	4.009	0.008	0.046	Up
