# Supplementary material for: Effects of BRD4 inhibitor JQ1 on the expression profile of super-enhancer related lncRNAs and mRNAs in cervical cancer HeLa cells
Source: PeerJ. 2024 Feb 23;12:e17035. doi: 10.7717/peerj.17035 (PMC10896078; doi:10.7717/peerj.17035)
Supplement: Supplemental Information 8 [file peerj-12-17035-s008.xlsx]

## Sheet: Supplementary Table S4
Supplementary Table S4 | Results of correlation analysis of between lncRNAs and mRNAs
LncRNAs	mRNAs	cor	Pvalue
ADGRB3-DT	ABCA12	-0.985683	0.00466714
ADGRB3-DT	ABCB1	0.927099	0.0256767
ADGRB3-DT	ABCG4	0.984163	0.00507457
ADGRB3-DT	ABTB3	0.880277	0.0490203
ADGRB3-DT	ACKR3	-0.971849	0.00850621
ADGRB3-DT	ACSL5	-0.959252	0.0129668
ADGRB3-DT	ACTL8	-0.989942	0.00395631
ADGRB3-DT	ADAMTS10	-0.941032	0.0198295
ADGRB3-DT	ADAMTS8	-0.994127	0.00323752
ADGRB3-DT	ADCY1	0.981527	0.00587443
ADGRB3-DT	ADCY7	-0.980117	0.00626828
ADGRB3-DT	ADGRF4	-0.991388	0.00358907
ADGRB3-DT	ADGRL1	-0.9881	0.00435467
ADGRB3-DT	AGBL1	-0.982486	0.00559469
ADGRB3-DT	AGTR1	0.986377	0.00458992
ADGRB3-DT	ALDH1A3	-0.996338	0.00245567
ADGRB3-DT	ALDH3B1	-0.921276	0.0282218
ADGRB3-DT	ALPP	-0.892442	0.0425462
ADGRB3-DT	ALS2CL	-0.977265	0.00684459
ADGRB3-DT	AMOT	0.933629	0.0229456
ADGRB3-DT	ANGPTL2	-0.983691	0.00525165
ADGRB3-DT	ANGPTL6	0.940248	0.0200863
ADGRB3-DT	ANO3	0.981209	0.00590419
ADGRB3-DT	ANO3-AS1	0.996057	0.00253525
ADGRB3-DT	ANXA10	-0.989264	0.00410327
ADGRB3-DT	ANXA8L1	-0.985827	0.00466714
ADGRB3-DT	APBA1	0.936227	0.0216628
ADGRB3-DT	APOL1	-0.990943	0.00368045
ADGRB3-DT	ARHGEF16	-0.942127	0.0194271
ADGRB3-DT	ASIC1	-0.990644	0.00376657
ADGRB3-DT	ATOH8	-0.98937	0.0040789
ADGRB3-DT	ATP1A2	-0.984592	0.00496882
ADGRB3-DT	ATP1A3	0.997614	0.0018727
ADGRB3-DT	ATP1B2	0.957085	0.0136797
ADGRB3-DT	ATP6AP1	0.861344	0.0598581
ADGRB3-DT	B3GALT1	0.962688	0.0117347
ADGRB3-DT	B4GALNT4	-0.997588	0.0018727
ADGRB3-DT	BAIAP3	0.986331	0.00460867
ADGRB3-DT	BDKRB2	-0.986701	0.0045885
ADGRB3-DT	BSN	0.981235	0.00590419
ADGRB3-DT	C17orf113	-0.95484	0.0146417
ADGRB3-DT	C1orf116	-0.900197	0.0384686
ADGRB3-DT	C1S	-0.918567	0.0293491
ADGRB3-DT	C3orf33	-0.903001	0.0370265
ADGRB3-DT	C4BPB	-0.996469	0.00241368
ADGRB3-DT	CA11	-0.988532	0.00421418
ADGRB3-DT	CA9	-0.985379	0.00475254
ADGRB3-DT	CABYR	0.935685	0.0219191
ADGRB3-DT	CASKIN1	-0.931796	0.0236858
ADGRB3-DT	CATSPER1	-0.989631	0.00401
ADGRB3-DT	CBLN3	-0.994431	0.00319473
ADGRB3-DT	CC2D2A	-0.987424	0.00440221
ADGRB3-DT	CCDC102A	-0.912879	0.0318417
ADGRB3-DT	CDC42BPG	-0.979447	0.00644302
ADGRB3-DT	CDH19	0.97781	0.00679886
ADGRB3-DT	CDH3	-0.965106	0.0107494
ADGRB3-DT	CDK5R2	0.859748	0.0607003
ADGRB3-DT	CGREF1	-0.995002	0.00304944
ADGRB3-DT	CHD1L	-0.986383	0.00458992
ADGRB3-DT	CHRM4	0.873484	0.0529162
ADGRB3-DT	CLDN7	-0.994127	0.00323752
ADGRB3-DT	CLDN9	0.951079	0.0159968
ADGRB3-DT	CLIP3	0.977528	0.00679886
ADGRB3-DT	CLMP	-0.998035	0.00184125
ADGRB3-DT	CNKSR1	-0.974741	0.00756331
ADGRB3-DT	COL15A1	-0.996441	0.00241368
ADGRB3-DT	COL18A1	0.915735	0.0304939
ADGRB3-DT	COL3A1	-0.997758	0.0018727
ADGRB3-DT	COL4A5	0.935741	0.0219132
ADGRB3-DT	COL7A1	0.891054	0.0432502
ADGRB3-DT	COMMD7	-0.956244	0.0139961
ADGRB3-DT	COMTD1	-0.978597	0.00663162
ADGRB3-DT	CPNE7	-0.975807	0.00722465
ADGRB3-DT	CRISPLD2	0.987631	0.00437718
ADGRB3-DT	CRMP1	-0.995388	0.00294902
ADGRB3-DT	CRYL1	0.977418	0.00680079
ADGRB3-DT	CSDC2	-0.969505	0.00923646
ADGRB3-DT	CSGALNACT1	0.98603	0.00466714
ADGRB3-DT	CSPG4	-0.998611	0.00134477
ADGRB3-DT	CTNNA2	-0.986762	0.0045885
ADGRB3-DT	CTSS	-0.983307	0.00534063
ADGRB3-DT	CTSV	0.97285	0.00823508
ADGRB3-DT	CTXN1	-0.959286	0.0129564
ADGRB3-DT	CUX1	-0.936478	0.0215802
ADGRB3-DT	CXCL8	0.992272	0.00344106
ADGRB3-DT	CYB561	-0.992175	0.00344106
ADGRB3-DT	CYB5RL	-0.993616	0.00324707
ADGRB3-DT	CYP27C1	-0.994402	0.00319473
ADGRB3-DT	CYP4F11	0.934857	0.0223255
ADGRB3-DT	DACT3	0.993242	0.00324707
ADGRB3-DT	DAG1	-0.864386	0.0581664
ADGRB3-DT	DCN	-0.985689	0.00466714
ADGRB3-DT	DDX6	0.923162	0.0274041
ADGRB3-DT	DENND2D	-0.99748	0.0018727
ADGRB3-DT	DIO2	-0.985805	0.00466714
ADGRB3-DT	DMXL2	0.885985	0.04584
ADGRB3-DT	DSC2	-0.98857	0.00421418
ADGRB3-DT	DTHD1	-0.939911	0.0201648
ADGRB3-DT	DTX4	-0.977068	0.0069242
ADGRB3-DT	DUOX1	-0.980989	0.00601087
ADGRB3-DT	DUSP5	0.872838	0.053259
ADGRB3-DT	DUSP6	0.994806	0.0031336
ADGRB3-DT	E2F2	-0.977714	0.00679886
ADGRB3-DT	EDAR	-0.989924	0.00395631
ADGRB3-DT	EEF1A2	-0.954718	0.0146843
ADGRB3-DT	EEF1AKMT3	-0.986913	0.00455678
ADGRB3-DT	EEPD1	0.937214	0.0212745
ADGRB3-DT	EFR3B	0.986155	0.00465303
ADGRB3-DT	EGR1	0.991819	0.00351853
ADGRB3-DT	EIF5B	0.991442	0.00358907
ADGRB3-DT	ENO4	0.882622	0.0476765
ADGRB3-DT	ENPP1	0.952019	0.0157112
ADGRB3-DT	EPCAM	-0.977209	0.00686809
ADGRB3-DT	EPM2A	0.923489	0.0272658
ADGRB3-DT	EVPLL	-0.887794	0.0449466
ADGRB3-DT	EWSR1	0.856289	0.0625303
ADGRB3-DT	FAM131C	-0.976998	0.00693887
ADGRB3-DT	FAM171A1	-0.998421	0.00134477
ADGRB3-DT	FAM217B	0.84855	0.0666364
ADGRB3-DT	FAM222A	0.979464	0.00644302
ADGRB3-DT	FBXL16	-0.975765	0.00722465
ADGRB3-DT	FEZ2	0.937677	0.0211206
ADGRB3-DT	FGFR3	0.982365	0.00563016
ADGRB3-DT	FIZ1	-0.968806	0.00942258
ADGRB3-DT	FKBP2	0.90119	0.0379008
ADGRB3-DT	FLT3LG	-0.906984	0.0349111
ADGRB3-DT	FMN2	-0.917598	0.0297586
ADGRB3-DT	FSIP2	-0.981846	0.00577429
ADGRB3-DT	GALC	-0.993139	0.00324707
ADGRB3-DT	GALNT5	-0.978754	0.00661419
ADGRB3-DT	GALNTL6	-0.975373	0.00728804
ADGRB3-DT	GAREM2	-0.967394	0.00993307
ADGRB3-DT	GARIN5B	0.93839	0.0208046
ADGRB3-DT	GBP1	-0.986254	0.00463664
ADGRB3-DT	GIPC3	-0.981964	0.00576545
ADGRB3-DT	GJA3	0.955627	0.0142873
ADGRB3-DT	GLI1	-0.973281	0.00810329
ADGRB3-DT	GP6	0.87766	0.0504281
ADGRB3-DT	GPM6B	-0.979724	0.00633396
ADGRB3-DT	GPR146	0.934769	0.0223597
ADGRB3-DT	GPX7	-0.95893	0.0131057
ADGRB3-DT	GREM1	-0.968245	0.00957956
ADGRB3-DT	GRIN3B	-0.903587	0.0367731
ADGRB3-DT	GRM1	-0.9981	0.00181075
ADGRB3-DT	GRPEL2	0.986507	0.0045885
ADGRB3-DT	GSAP	-0.963209	0.0115189
ADGRB3-DT	GSTO2	-0.992767	0.00341766
ADGRB3-DT	GTF2F2	0.968582	0.00945441
ADGRB3-DT	H1-0	0.996043	0.00253525
ADGRB3-DT	H1-6	0.993967	0.00324707
ADGRB3-DT	H2AC7	-0.941185	0.0197788
ADGRB3-DT	H2BC9	0.833401	0.0753026
ADGRB3-DT	H3-7	0.950918	0.0160328
ADGRB3-DT	HAL	0.938904	0.0206053
ADGRB3-DT	HEY2	0.973053	0.00818431
ADGRB3-DT	HPCAL4	0.887893	0.0449219
ADGRB3-DT	HRCT1	-0.964704	0.0108654
ADGRB3-DT	HRH3	0.864691	0.0580157
ADGRB3-DT	HSBP1L1	-0.920283	0.0286822
ADGRB3-DT	HSD3B7	-0.996038	0.00253525
ADGRB3-DT	HSF2BP	-0.968925	0.00939865
ADGRB3-DT	HTR1D	-0.954355	0.0147912
ADGRB3-DT	ICOSLG	-0.965703	0.0105428
ADGRB3-DT	IFI44	-0.879895	0.0492203
ADGRB3-DT	IFI44L	-0.973599	0.00799879
ADGRB3-DT	IFITM1	-0.97768	0.00679886
ADGRB3-DT	IFITM2	-0.975779	0.00722465
ADGRB3-DT	IFNB1	0.802301	0.0940333
ADGRB3-DT	IGF2	0.990247	0.00391902
ADGRB3-DT	IGFBP5	-0.990097	0.00393662
ADGRB3-DT	IL1A	-0.978332	0.00665191
ADGRB3-DT	IL27RA	-0.954379	0.0147912
ADGRB3-DT	IL7R	-0.949595	0.0164623
ADGRB3-DT	IMPDH1	-0.964943	0.0107923
ADGRB3-DT	IRF7	0.953441	0.0152164
ADGRB3-DT	ISLR	-0.973881	0.00788693
ADGRB3-DT	ITGA2	0.913807	0.0313901
ADGRB3-DT	JPH2	-0.992074	0.00344106
ADGRB3-DT	JPH3	-0.96853	0.00946257
ADGRB3-DT	KAZALD1	-0.941343	0.0197074
ADGRB3-DT	KCNC4	-0.996616	0.00236735
ADGRB3-DT	KCNJ2	0.985395	0.00475254
ADGRB3-DT	KCNRG	0.796811	0.0975786
ADGRB3-DT	KCTD15	-0.874256	0.0525144
ADGRB3-DT	KIAA0319	0.977817	0.00679886
ADGRB3-DT	KIAA1522	-0.979184	0.00648527
ADGRB3-DT	KRT13	-0.987923	0.00437718
ADGRB3-DT	KRT19	-0.998526	0.00134477
ADGRB3-DT	KRT8	-0.860341	0.0603647
ADGRB3-DT	KRT80	-0.987393	0.00440221
ADGRB3-DT	LAMA1	-0.969595	0.0092299
ADGRB3-DT	LAMB3	-0.994745	0.00316829
ADGRB3-DT	LAMC3	-0.987533	0.00440221
ADGRB3-DT	LGSN	-0.979207	0.00648126
ADGRB3-DT	LIMS1	0.830221	0.0770269
ADGRB3-DT	LIMS2	-0.956614	0.0138698
ADGRB3-DT	LINC00640	0.86176	0.0595993
ADGRB3-DT	LRFN1	-0.931054	0.0239634
ADGRB3-DT	LRMDA	-0.963753	0.0113186
ADGRB3-DT	LRP1	-0.989337	0.0040789
ADGRB3-DT	LRP11	0.872379	0.0535292
ADGRB3-DT	LRP3	-0.959971	0.0126955
ADGRB3-DT	LRRC3	-0.950216	0.0162831
ADGRB3-DT	LYRM9	0.894215	0.0417724
ADGRB3-DT	MAMDC2	-0.996218	0.00247754
ADGRB3-DT	MAN1C1	0.953583	0.0151471
ADGRB3-DT	MAP1A	0.954117	0.0148747
ADGRB3-DT	MAPK3	-0.90399	0.0365497
ADGRB3-DT	MARCHF3	0.977804	0.00679886
ADGRB3-DT	MDGA1	0.995407	0.00294902
ADGRB3-DT	METTL7B	-0.752648	0.12426
ADGRB3-DT	MEX3A	-0.962528	0.0117379
ADGRB3-DT	MFAP2	-0.843897	0.0689679
ADGRB3-DT	MGAT4A	0.950182	0.0162935
ADGRB3-DT	MIER3	0.901941	0.0375833
ADGRB3-DT	MISP	-0.97305	0.00818431
ADGRB3-DT	MMP1	0.940698	0.0199009
ADGRB3-DT	MMP2	-0.833778	0.0750851
ADGRB3-DT	MMRN2	-0.984416	0.00500139
ADGRB3-DT	MORN4	-0.859836	0.0606466
ADGRB3-DT	MPL	0.819566	0.0835936
ADGRB3-DT	MRAP2	-0.992442	0.00344106
ADGRB3-DT	MRGPRE	-0.979826	0.00631423
ADGRB3-DT	MT-ATP6	0.995633	0.00279488
ADGRB3-DT	MTSS2	-0.957226	0.0136263
ADGRB3-DT	MVB12B	-0.940534	0.0199557
ADGRB3-DT	MYL9	-0.993844	0.00324707
ADGRB3-DT	MYO16	-0.986429	0.00458992
ADGRB3-DT	MYO1D	0.986503	0.0045885
ADGRB3-DT	MYO5C	-0.982684	0.00550092
ADGRB3-DT	MYPN	-0.992867	0.0033865
ADGRB3-DT	N4BP3	-0.977607	0.00679886
ADGRB3-DT	NAV1	-0.965584	0.0105844
ADGRB3-DT	NBPF4	-0.992044	0.00344106
ADGRB3-DT	NBPF6	-0.880582	0.0488527
ADGRB3-DT	NCKAP5	-0.978434	0.0066439
ADGRB3-DT	NECAB2	0.92355	0.0272482
ADGRB3-DT	NFATC1	-0.88042	0.0489639
ADGRB3-DT	NFATC4	-0.985689	0.00466714
ADGRB3-DT	NFE2	-0.98921	0.00411528
ADGRB3-DT	NFYA	0.896655	0.0406527
ADGRB3-DT	NGFR	0.945477	0.0179756
ADGRB3-DT	NIPAL2	-0.930487	0.0241707
ADGRB3-DT	NIPAL4	-0.975628	0.00722465
ADGRB3-DT	NOTUM	-0.960191	0.0126125
ADGRB3-DT	NPR1	-0.97803	0.00674543
ADGRB3-DT	NPTXR	0.98742	0.00440221
ADGRB3-DT	NPY4R	-0.959594	0.0128277
ADGRB3-DT	NPY4R2	-0.943371	0.0188452
ADGRB3-DT	NQO1	0.993381	0.00324707
ADGRB3-DT	NR5A2	0.981135	0.00593981
ADGRB3-DT	NRIP3	0.985041	0.00489428
ADGRB3-DT	NSFL1C	0.914309	0.0311586
ADGRB3-DT	NYNRIN	-0.995998	0.00254299
ADGRB3-DT	OASL	-0.995274	0.00297222
ADGRB3-DT	OLFM4	-0.991313	0.00358907
ADGRB3-DT	OSGIN1	0.989601	0.00401624
ADGRB3-DT	OTUD7A	0.918894	0.029257
ADGRB3-DT	P2RY4	0.966007	0.0104233
ADGRB3-DT	PAG1	0.991049	0.00362915
ADGRB3-DT	PALD1	-0.914937	0.0308376
ADGRB3-DT	PALM	-0.961083	0.0122207
ADGRB3-DT	PALMD	-0.951543	0.0158668
ADGRB3-DT	PAPPA2	-0.970945	0.00875507
ADGRB3-DT	PARP10	-0.891133	0.043232
ADGRB3-DT	PAX5	0.92503	0.0267176
ADGRB3-DT	PCDHB11	-0.985571	0.00472886
ADGRB3-DT	PCDHB13	-0.982375	0.00563016
ADGRB3-DT	PCDHB14	-0.983649	0.00525165
ADGRB3-DT	PCDHGA10	-0.937117	0.0213119
ADGRB3-DT	PCDHGA4	-0.956281	0.013983
ADGRB3-DT	PCDHGA5	-0.984101	0.00509264
ADGRB3-DT	PCDHGA6	-0.969303	0.00929731
ADGRB3-DT	PCDHGA7	-0.919235	0.0290925
ADGRB3-DT	PCDHGB2	-0.936063	0.0217482
ADGRB3-DT	PCDHGB6	-0.98784	0.00437718
ADGRB3-DT	PCP2	-0.993715	0.00324707
ADGRB3-DT	PCSK1	-0.999083	0.00134477
ADGRB3-DT	PDE1A	-0.967043	0.0100668
ADGRB3-DT	PDE4A	-0.984415	0.00500139
ADGRB3-DT	PDGFB	-0.957028	0.0137047
ADGRB3-DT	PDGFRB	-0.952208	0.0156292
ADGRB3-DT	PDLIM2	-0.99335	0.00324707
ADGRB3-DT	PDZD2	-0.903202	0.0369993
ADGRB3-DT	PGF	0.910517	0.0330705
ADGRB3-DT	PIEZO1	0.865914	0.0573922
ADGRB3-DT	PINLYP	0.893394	0.0421646
ADGRB3-DT	PIP5K1B	0.957682	0.0134817
ADGRB3-DT	PKP3	-0.954863	0.0146417
ADGRB3-DT	PLAAT4	-0.98783	0.00437718
ADGRB3-DT	PLAC8L1	-0.940191	0.0200863
ADGRB3-DT	PLEKHA4	-0.984901	0.00491124
ADGRB3-DT	PLK2	-0.989821	0.00397475
ADGRB3-DT	PNPLA2	0.860701	0.0601641
ADGRB3-DT	POC1B-GALNT4	-0.994659	0.00319473
ADGRB3-DT	POLR2J3	0.874821	0.0522104
ADGRB3-DT	POU4F3	0.976781	0.0069597
ADGRB3-DT	PPAN-P2RY11	0.811764	0.0881456
ADGRB3-DT	PPM1J	0.9268	0.025826
ADGRB3-DT	PPP1R14C	0.957768	0.0134635
ADGRB3-DT	PRH2	-0.971656	0.00853959
ADGRB3-DT	PRLR	-0.978763	0.00661419
ADGRB3-DT	PRRX1	-0.994472	0.00319473
ADGRB3-DT	PSG5	-0.984874	0.00491124
ADGRB3-DT	PTCHD4	-0.96189	0.0119574
ADGRB3-DT	PTPRQ	-0.959184	0.0129978
ADGRB3-DT	PWWP2B	-0.986017	0.00466714
ADGRB3-DT	QSER1	-0.733301	0.137325
ADGRB3-DT	RADX	0.910794	0.0329132
ADGRB3-DT	RASL10B	-0.988835	0.00418696
ADGRB3-DT	RASSF2	-0.984352	0.00502885
ADGRB3-DT	RBP1	-0.983913	0.00516924
ADGRB3-DT	RGL1	0.929255	0.0247586
ADGRB3-DT	RIMS4	-0.953635	0.0151249
ADGRB3-DT	RNF133	0.853227	0.0640573
ADGRB3-DT	ROPN1L	0.958156	0.0133653
ADGRB3-DT	ROS1	-0.970236	0.00901673
ADGRB3-DT	RPL3L	0.797716	0.0969234
ADGRB3-DT	RYR2	-0.956659	0.0138629
ADGRB3-DT	S100A3	-0.838349	0.0720177
ADGRB3-DT	S1PR2	-0.991281	0.00358907
ADGRB3-DT	SALL2	-0.960073	0.0126527
ADGRB3-DT	SALL4	-0.987041	0.00450629
ADGRB3-DT	SAMD10	-0.977385	0.0068011
ADGRB3-DT	SBSPON	-0.977505	0.00679886
ADGRB3-DT	SCARF2	0.924978	0.0267176
ADGRB3-DT	SCMH1	-0.967364	0.00994144
ADGRB3-DT	SCNN1A	-0.92455	0.0268742
ADGRB3-DT	SDHAF2	0.887779	0.0449466
ADGRB3-DT	SEC61A2	-0.97215	0.00844562
ADGRB3-DT	SERPINI1	0.990051	0.00393662
ADGRB3-DT	SERTAD1	0.955455	0.0143375
ADGRB3-DT	SH2D3A	-0.997623	0.0018727
ADGRB3-DT	SH3GL2	0.983246	0.00536268
ADGRB3-DT	SHC4	0.976842	0.00695885
ADGRB3-DT	SHKBP1	-0.976212	0.00714104
ADGRB3-DT	SHOC1	-0.9517	0.0158248
ADGRB3-DT	SIRPA	-0.946029	0.0177199
ADGRB3-DT	SIRT1	0.899467	0.0389259
ADGRB3-DT	SLC12A8	-0.979209	0.00648126
ADGRB3-DT	SLC16A9	-0.978745	0.00661419
ADGRB3-DT	SLC29A4	0.95475	0.014675
ADGRB3-DT	SLC2A5	-0.980077	0.00626828
ADGRB3-DT	SLC38A5	0.893525	0.0420938
ADGRB3-DT	SLC44A2	-0.980013	0.00626828
ADGRB3-DT	SLC4A4	0.81747	0.0849545
ADGRB3-DT	SMC1B	-0.915786	0.0304861
ADGRB3-DT	SNCG	-0.974561	0.00762877
ADGRB3-DT	SNTB1	-0.986433	0.00458992
ADGRB3-DT	SORBS1	0.982204	0.00567647
ADGRB3-DT	SORBS3	-0.977962	0.00676983
ADGRB3-DT	SPACA9	-0.906928	0.0349139
ADGRB3-DT	SPATA12	-0.993404	0.00324707
ADGRB3-DT	SPEG	-0.970829	0.00880039
ADGRB3-DT	SPINK4	-0.936404	0.0216041
ADGRB3-DT	SPOCD1	-0.971142	0.00870364
ADGRB3-DT	SPTBN2	-0.990879	0.00368346
ADGRB3-DT	SRC	-0.994807	0.0031336
ADGRB3-DT	SRD5A1	-0.805461	0.0922232
ADGRB3-DT	STEAP4	-0.981735	0.00580385
ADGRB3-DT	STK11	0.818886	0.0840363
ADGRB3-DT	STOX1	0.963367	0.0114754
ADGRB3-DT	SULT4A1	0.985995	0.00466714
ADGRB3-DT	SYNC	-0.922977	0.0274655
ADGRB3-DT	SYNPO	-0.995853	0.00266142
ADGRB3-DT	SYTL2	0.91658	0.0301679
ADGRB3-DT	TAGLN	-0.912157	0.0322614
ADGRB3-DT	TAS2R19	0.987756	0.00437718
ADGRB3-DT	TBKBP1	-0.979815	0.00631423
ADGRB3-DT	TBXA2R	-0.966198	0.0103699
ADGRB3-DT	TCEA3	-0.912643	0.0319397
ADGRB3-DT	TEK	-0.998972	0.00134477
ADGRB3-DT	TENM1	0.949432	0.0165178
ADGRB3-DT	TENM2	-0.993148	0.00324707
ADGRB3-DT	TET1	-0.964887	0.0108081
ADGRB3-DT	TGFB1I1	-0.943451	0.0188251
ADGRB3-DT	TGIF2-RAB5IF	-0.9913	0.00358907
ADGRB3-DT	THAP8	0.922711	0.0275668
ADGRB3-DT	THEMIS2	0.885786	0.0458733
ADGRB3-DT	THRA	-0.995091	0.00302055
ADGRB3-DT	TICAM2	-0.993809	0.00324707
ADGRB3-DT	TIGD7	-0.976713	0.00698421
ADGRB3-DT	TLE5	-0.95757	0.0135242
ADGRB3-DT	TLL2	0.871766	0.0539015
ADGRB3-DT	TLR3	-0.978557	0.00663162
ADGRB3-DT	TMEM151B	-0.979871	0.00631423
ADGRB3-DT	TMEM171	0.930303	0.0242064
ADGRB3-DT	TMEM184A	-0.995356	0.00294902
ADGRB3-DT	TMEM39B	0.861988	0.0594481
ADGRB3-DT	TMEM54	-0.958221	0.013353
ADGRB3-DT	TNFSF10	-0.982797	0.00548239
ADGRB3-DT	TNS2	-0.97762	0.00679886
ADGRB3-DT	TP53I11	-0.98866	0.00421418
ADGRB3-DT	TP63	-0.973676	0.007991
ADGRB3-DT	TRIM22	-0.993862	0.00324707
ADGRB3-DT	TRIM29	-0.992021	0.00344139
ADGRB3-DT	TRIM46	-0.990658	0.00376657
ADGRB3-DT	TSPAN1	-0.957681	0.0134817
ADGRB3-DT	TSPOAP1	-0.984435	0.00500139
ADGRB3-DT	TXLNB	-0.899414	0.0389501
ADGRB3-DT	UFC1	-0.945284	0.0180554
ADGRB3-DT	UGT1A1	-0.971815	0.00850621
ADGRB3-DT	UGT1A7	-0.962035	0.0119193
ADGRB3-DT	UNC13D	-0.969737	0.00921114
ADGRB3-DT	UROD	-0.949183	0.0166111
ADGRB3-DT	USP43	-0.952549	0.0155104
ADGRB3-DT	USP54	0.894379	0.0416883
ADGRB3-DT	VIT	-0.986519	0.0045885
ADGRB3-DT	VPS52	-0.894634	0.0415758
ADGRB3-DT	VSTM5	-0.982147	0.00568134
ADGRB3-DT	VWA7	-0.877214	0.0507141
ADGRB3-DT	WFDC2	-0.978407	0.0066509
ADGRB3-DT	WHRN	-0.935726	0.0219132
ADGRB3-DT	WNT4	0.985475	0.00473914
ADGRB3-DT	YOD1	-0.874067	0.0525402
ADGRB3-DT	YPEL1	0.978257	0.00667166
ADGRB3-DT	ZAR1	-0.987267	0.0044134
ADGRB3-DT	ZBTB2	-0.806569	0.0915127
ADGRB3-DT	ZBTB38	-0.992272	0.00344106
ADGRB3-DT	ZC3HAV1L	-0.988339	0.00426435
ADGRB3-DT	ZHX2	-0.981329	0.0058955
ADGRB3-DT	ZNF419	0.93033	0.0242064
ADGRB3-DT	ZNF532	-0.846116	0.0677803
ADGRB3-DT	ZNF837	0.873491	0.0529162
BTG1-DT	ABCA12	-0.56127	0.2773
BTG1-DT	ABCB1	0.414104	0.426832
BTG1-DT	ABCG4	0.711215	0.152951
BTG1-DT	ABTB3	0.436064	0.401373
BTG1-DT	ACKR3	-0.500468	0.334144
BTG1-DT	ACSL5	-0.508595	0.326136
BTG1-DT	ACTL8	-0.55258	0.285026
BTG1-DT	ADAMTS10	-0.614171	0.230837
BTG1-DT	ADAMTS8	-0.569695	0.269856
BTG1-DT	ADCY1	0.563569	0.275262
BTG1-DT	ADCY7	-0.602333	0.241169
BTG1-DT	ADGRF4	-0.614039	0.230911
BTG1-DT	ADGRL1	-0.596491	0.246076
BTG1-DT	AGBL1	-0.752199	0.124575
BTG1-DT	AGTR1	0.578264	0.262349
BTG1-DT	ALDH1A3	-0.693948	0.166095
BTG1-DT	ALDH3B1	-0.360561	0.491483
BTG1-DT	ALPP	-0.343527	0.512391
BTG1-DT	ALS2CL	-0.642165	0.207694
BTG1-DT	AMOT	0.581233	0.25969
BTG1-DT	ANGPTL2	-0.60434	0.239501
BTG1-DT	ANGPTL6	0.578367	0.262348
BTG1-DT	ANO3	0.555015	0.282896
BTG1-DT	ANO3-AS1	0.571211	0.268499
BTG1-DT	ANXA10	-0.583779	0.257351
BTG1-DT	ANXA8L1	-0.638567	0.210505
BTG1-DT	APBA1	0.444166	0.392787
BTG1-DT	APOL1	-0.682106	0.175223
BTG1-DT	ARHGEF16	-0.582508	0.258518
BTG1-DT	ASIC1	-0.566563	0.272634
BTG1-DT	ATOH8	-0.523478	0.311591
BTG1-DT	ATP1A2	-0.557566	0.280534
BTG1-DT	ATP1A3	0.584064	0.25712
BTG1-DT	ATP1B2	0.690474	0.168842
BTG1-DT	ATP6AP1	0.484342	0.350232
BTG1-DT	B3GALT1	0.689735	0.169267
BTG1-DT	B4GALNT4	-0.616925	0.228517
BTG1-DT	BAIAP3	0.594666	0.247419
BTG1-DT	BDKRB2	-0.552555	0.285026
BTG1-DT	BSN	0.581483	0.259499
BTG1-DT	C17orf113	-0.827225	0.0789349
BTG1-DT	C1orf116	-0.245785	0.641166
BTG1-DT	C1S	-0.62454	0.221948
BTG1-DT	C3orf33	-0.890279	0.0436488
BTG1-DT	C4BPB	-0.620905	0.225061
BTG1-DT	CA11	-0.739084	0.133013
BTG1-DT	CA9	-0.621021	0.224976
BTG1-DT	CABYR	0.38042	0.466581
BTG1-DT	CASKIN1	-0.460779	0.374346
BTG1-DT	CATSPER1	-0.551994	0.285409
BTG1-DT	CBLN3	-0.683781	0.173914
BTG1-DT	CC2D2A	-0.525643	0.309825
BTG1-DT	CCDC102A	-0.329985	0.529314
BTG1-DT	CDC42BPG	-0.529557	0.306625
BTG1-DT	CDH19	0.64173	0.207964
BTG1-DT	CDH3	-0.47289	0.3618
BTG1-DT	CDK5R2	0.409841	0.431602
BTG1-DT	CGREF1	-0.690303	0.168905
BTG1-DT	CHD1L	-0.535489	0.300834
BTG1-DT	CHRM4	0.358896	0.493302
BTG1-DT	CLDN7	-0.56237	0.276305
BTG1-DT	CLDN9	0.426157	0.412911
BTG1-DT	CLIP3	0.696474	0.16412
BTG1-DT	CLMP	-0.598134	0.244816
BTG1-DT	CNKSR1	-0.616763	0.228654
BTG1-DT	COL15A1	-0.569255	0.270143
BTG1-DT	COL18A1	0.452398	0.38381
BTG1-DT	COL3A1	-0.671314	0.183951
BTG1-DT	COL4A5	0.496095	0.338408
BTG1-DT	COL7A1	0.35732	0.49532
BTG1-DT	COMMD7	-0.550895	0.286285
BTG1-DT	COMTD1	-0.59264	0.248977
BTG1-DT	CPNE7	-0.722585	0.144377
BTG1-DT	CRISPLD2	0.527925	0.307974
BTG1-DT	CRMP1	-0.584982	0.256217
BTG1-DT	CRYL1	0.492714	0.342033
BTG1-DT	CSDC2	-0.469326	0.365576
BTG1-DT	CSGALNACT1	0.559724	0.278775
BTG1-DT	CSPG4	-0.607508	0.23668
BTG1-DT	CTNNA2	-0.535951	0.300447
BTG1-DT	CTSS	-0.727058	0.14147
BTG1-DT	CTSV	0.638717	0.210423
BTG1-DT	CTXN1	-0.490123	0.344656
BTG1-DT	CUX1	-0.72667	0.141694
BTG1-DT	CXCL8	0.598068	0.244816
BTG1-DT	CYB561	-0.585611	0.255735
BTG1-DT	CYB5RL	-0.605113	0.238871
BTG1-DT	CYP27C1	-0.585416	0.255817
BTG1-DT	CYP4F11	0.574898	0.265274
BTG1-DT	DACT3	0.600894	0.242352
BTG1-DT	DAG1	-0.444718	0.392203
BTG1-DT	DCN	-0.506514	0.32811
BTG1-DT	DDX6	0.407469	0.434369
BTG1-DT	DENND2D	-0.629027	0.21799
BTG1-DT	DIO2	-0.682594	0.174895
BTG1-DT	DMXL2	0.480637	0.353574
BTG1-DT	DSC2	-0.514936	0.3198
BTG1-DT	DTHD1	-0.614484	0.230667
BTG1-DT	DTX4	-0.465588	0.369449
BTG1-DT	DUOX1	-0.665953	0.188297
BTG1-DT	DUSP5	0.485548	0.349113
BTG1-DT	DUSP6	0.573484	0.266418
BTG1-DT	E2F2	-0.583146	0.257902
BTG1-DT	EDAR	-0.551066	0.286226
BTG1-DT	EEF1A2	-0.44363	0.393363
BTG1-DT	EEF1AKMT3	-0.684519	0.173291
BTG1-DT	EEPD1	0.438368	0.398867
BTG1-DT	EFR3B	0.57012	0.269464
BTG1-DT	EGR1	0.618949	0.226836
BTG1-DT	EIF5B	0.57817	0.262385
BTG1-DT	ENO4	0.449333	0.387125
BTG1-DT	ENPP1	0.460179	0.374964
BTG1-DT	EPCAM	-0.482051	0.352145
BTG1-DT	EPM2A	0.378727	0.468574
BTG1-DT	EVPLL	-0.33777	0.519723
BTG1-DT	EWSR1	0.526661	0.309099
BTG1-DT	FAM131C	-0.476661	0.357839
BTG1-DT	FAM171A1	-0.593628	0.248128
BTG1-DT	FAM217B	0.491301	0.343573
BTG1-DT	FAM222A	0.553704	0.28397
BTG1-DT	FBXL16	-0.609666	0.234844
BTG1-DT	FEZ2	0.553056	0.284624
BTG1-DT	FGFR3	0.528112	0.307859
BTG1-DT	FIZ1	-0.645628	0.20487
BTG1-DT	FKBP2	0.420843	0.418913
BTG1-DT	FLT3LG	-0.270638	0.607969
BTG1-DT	FMN2	-0.313677	0.55063
BTG1-DT	FSIP2	-0.681256	0.175819
BTG1-DT	GALC	-0.623691	0.22267
BTG1-DT	GALNT5	-0.596514	0.246076
BTG1-DT	GALNTL6	-0.548717	0.288305
BTG1-DT	GAREM2	-0.512794	0.322028
BTG1-DT	GARIN5B	0.331819	0.526919
BTG1-DT	GBP1	-0.508768	0.326017
BTG1-DT	GIPC3	-0.680854	0.176094
BTG1-DT	GJA3	0.576115	0.264309
BTG1-DT	GLI1	-0.496837	0.337788
BTG1-DT	GP6	0.609623	0.234848
BTG1-DT	GPM6B	-0.548641	0.288305
BTG1-DT	GPR146	0.494365	0.340321
BTG1-DT	GPX7	-0.783095	0.105762
BTG1-DT	GREM1	-0.442568	0.39442
BTG1-DT	GRIN3B	-0.700155	0.161342
BTG1-DT	GRM1	-0.61587	0.229514
BTG1-DT	GRPEL2	0.532753	0.30364
BTG1-DT	GSAP	-0.457209	0.378156
BTG1-DT	GSTO2	-0.574437	0.265565
BTG1-DT	GTF2F2	0.555985	0.28202
BTG1-DT	H1-0	0.583131	0.257902
BTG1-DT	H1-6	0.632525	0.215244
BTG1-DT	H2AC7	-0.795753	0.098195
BTG1-DT	H2BC9	0.482532	0.351735
BTG1-DT	H3-7	0.623948	0.22243
BTG1-DT	HAL	0.47316	0.36153
BTG1-DT	HEY2	0.545551	0.291048
BTG1-DT	HPCAL4	0.569987	0.269568
BTG1-DT	HRCT1	-0.489174	0.345635
BTG1-DT	HRH3	0.533642	0.302749
BTG1-DT	HSBP1L1	-0.436648	0.400769
BTG1-DT	HSD3B7	-0.597614	0.245092
BTG1-DT	HSF2BP	-0.471972	0.362747
BTG1-DT	HTR1D	-0.607231	0.236858
BTG1-DT	ICOSLG	-0.638395	0.210652
BTG1-DT	IFI44	-0.204625	0.698775
BTG1-DT	IFI44L	-0.607733	0.236473
BTG1-DT	IFITM1	-0.632918	0.21498
BTG1-DT	IFITM2	-0.464696	0.370428
BTG1-DT	IFNB1	0.327334	0.532734
BTG1-DT	IGF2	0.55679	0.281235
BTG1-DT	IGFBP5	-0.658588	0.194408
BTG1-DT	IL1A	-0.510482	0.324352
BTG1-DT	IL27RA	-0.387331	0.458365
BTG1-DT	IL7R	-0.607843	0.236395
BTG1-DT	IMPDH1	-0.790594	0.1011
BTG1-DT	IRF7	0.44253	0.39442
BTG1-DT	ISLR	-0.625604	0.221072
BTG1-DT	ITGA2	0.51912	0.315667
BTG1-DT	JPH2	-0.688922	0.169804
BTG1-DT	JPH3	-0.426741	0.412294
BTG1-DT	KAZALD1	-0.413879	0.426982
BTG1-DT	KCNC4	-0.583646	0.257456
BTG1-DT	KCNJ2	0.546704	0.290007
BTG1-DT	KCNRG	0.521521	0.313484
BTG1-DT	KCTD15	-0.578004	0.262527
BTG1-DT	KIAA0319	0.670923	0.184214
BTG1-DT	KIAA1522	-0.612214	0.232489
BTG1-DT	KRT13	-0.547351	0.289405
BTG1-DT	KRT19	-0.634376	0.213749
BTG1-DT	KRT8	-0.919973	0.0287292
BTG1-DT	KRT80	-0.675217	0.180558
BTG1-DT	LAMA1	-0.44471	0.392203
BTG1-DT	LAMB3	-0.595775	0.246712
BTG1-DT	LAMC3	-0.675665	0.180308
BTG1-DT	LGSN	-0.536412	0.299957
BTG1-DT	LIMS1	0.447397	0.389161
BTG1-DT	LIMS2	-0.717305	0.148316
BTG1-DT	LINC00640	0.34221	0.513996
BTG1-DT	LRFN1	-0.396464	0.447221
BTG1-DT	LRMDA	-0.500918	0.333979
BTG1-DT	LRP1	-0.629446	0.217698
BTG1-DT	LRP11	0.526222	0.309407
BTG1-DT	LRP3	-0.439037	0.398157
BTG1-DT	LRRC3	-0.823253	0.0812475
BTG1-DT	LYRM9	0.614869	0.230364
BTG1-DT	MAMDC2	-0.567523	0.271823
BTG1-DT	MAN1C1	0.46291	0.372266
BTG1-DT	MAP1A	0.474519	0.360103
BTG1-DT	MAPK3	-0.264293	0.616376
BTG1-DT	MARCHF3	0.506864	0.327856
BTG1-DT	MDGA1	0.592225	0.249353
BTG1-DT	METTL7B	-0.190948	0.718302
BTG1-DT	MEX3A	-0.662415	0.19138
BTG1-DT	MFAP2	-0.67023	0.184727
BTG1-DT	MGAT4A	0.486931	0.347955
BTG1-DT	MIER3	0.496059	0.338408
BTG1-DT	MISP	-0.759743	0.11942
BTG1-DT	MMP1	0.566159	0.272958
BTG1-DT	MMP2	-0.638285	0.21069
BTG1-DT	MMRN2	-0.654538	0.197652
BTG1-DT	MORN4	-0.854015	0.063688
BTG1-DT	MPL	0.33715	0.520475
BTG1-DT	MRAP2	-0.694017	0.166069
BTG1-DT	MRGPRE	-0.544145	0.292486
BTG1-DT	MT-ATP6	0.567446	0.271863
BTG1-DT	MTSS2	-0.420336	0.419355
BTG1-DT	MVB12B	-0.546103	0.290607
BTG1-DT	MYL9	-0.545131	0.291386
BTG1-DT	MYO16	-0.565502	0.273423
BTG1-DT	MYO1D	0.731212	0.13867
BTG1-DT	MYO5C	-0.482677	0.351616
BTG1-DT	MYPN	-0.547055	0.289699
BTG1-DT	N4BP3	-0.53912	0.297448
BTG1-DT	NAV1	-0.541645	0.295003
BTG1-DT	NBPF4	-0.629527	0.21765
BTG1-DT	NBPF6	-0.616142	0.229255
BTG1-DT	NCKAP5	-0.679672	0.176963
BTG1-DT	NECAB2	0.399952	0.443354
BTG1-DT	NFATC1	-0.246059	0.640879
BTG1-DT	NFATC4	-0.640483	0.208993
BTG1-DT	NFE2	-0.548443	0.28841
BTG1-DT	NFYA	0.610369	0.234149
BTG1-DT	NGFR	0.576144	0.264309
BTG1-DT	NIPAL2	-0.335546	0.522389
BTG1-DT	NIPAL4	-0.775138	0.110592
BTG1-DT	NOTUM	-0.515467	0.319223
BTG1-DT	NPR1	-0.475516	0.359061
BTG1-DT	NPTXR	0.532821	0.303613
BTG1-DT	NPY4R	-0.4555	0.380204
BTG1-DT	NPY4R2	-0.343235	0.512701
BTG1-DT	NQO1	0.567586	0.271799
BTG1-DT	NR5A2	0.582974	0.258034
BTG1-DT	NRIP3	0.562455	0.276305
BTG1-DT	NSFL1C	0.486327	0.348515
BTG1-DT	NYNRIN	-0.594029	0.247911
BTG1-DT	OASL	-0.620589	0.225367
BTG1-DT	OLFM4	-0.551816	0.285566
BTG1-DT	OSGIN1	0.522727	0.312268
BTG1-DT	OTUD7A	0.547532	0.289295
BTG1-DT	P2RY4	0.608405	0.235943
BTG1-DT	PAG1	0.558028	0.280183
BTG1-DT	PALD1	-0.327076	0.532998
BTG1-DT	PALM	-0.531082	0.305233
BTG1-DT	PALMD	-0.415592	0.425066
BTG1-DT	PAPPA2	-0.504405	0.330251
BTG1-DT	PARP10	-0.310617	0.55464
BTG1-DT	PAX5	0.519321	0.315504
BTG1-DT	PCDHB11	-0.710463	0.153542
BTG1-DT	PCDHB13	-0.503669	0.330967
BTG1-DT	PCDHB14	-0.506866	0.327856
BTG1-DT	PCDHGA10	-0.507001	0.327803
BTG1-DT	PCDHGA4	-0.578321	0.262349
BTG1-DT	PCDHGA5	-0.705013	0.15765
BTG1-DT	PCDHGA6	-0.464053	0.370977
BTG1-DT	PCDHGA7	-0.313159	0.55125
BTG1-DT	PCDHGB2	-0.421878	0.417852
BTG1-DT	PCDHGB6	-0.5726	0.267288
BTG1-DT	PCP2	-0.563904	0.274963
BTG1-DT	PCSK1	-0.625779	0.220964
BTG1-DT	PDE1A	-0.489481	0.345378
BTG1-DT	PDE4A	-0.743002	0.130344
BTG1-DT	PDGFB	-0.657062	0.195714
BTG1-DT	PDGFRB	-0.773888	0.111245
BTG1-DT	PDLIM2	-0.552495	0.285026
BTG1-DT	PDZD2	-0.271962	0.606309
BTG1-DT	PGF	0.712014	0.152215
BTG1-DT	PIEZO1	0.560231	0.278335
BTG1-DT	PINLYP	0.35965	0.492457
BTG1-DT	PIP5K1B	0.594887	0.247396
BTG1-DT	PKP3	-0.419093	0.42087
BTG1-DT	PLAAT4	-0.576438	0.264081
BTG1-DT	PLAC8L1	-0.790737	0.10102
BTG1-DT	PLEKHA4	-0.526333	0.309366
BTG1-DT	PLK2	-0.530115	0.306124
BTG1-DT	PNPLA2	0.346458	0.508731
BTG1-DT	POC1B-GALNT4	-0.561616	0.277029
BTG1-DT	POLR2J3	0.523255	0.311802
BTG1-DT	POU4F3	0.663779	0.190185
BTG1-DT	PPAN-P2RY11	0.421628	0.418001
BTG1-DT	PPM1J	0.422632	0.417043
BTG1-DT	PPP1R14C	0.404214	0.438066
BTG1-DT	PRH2	-0.525093	0.310264
BTG1-DT	PRLR	-0.474128	0.360522
BTG1-DT	PRRX1	-0.564595	0.274274
BTG1-DT	PSG5	-0.552531	0.285026
BTG1-DT	PTCHD4	-0.404876	0.437496
BTG1-DT	PTPRQ	-0.563456	0.275344
BTG1-DT	PWWP2B	-0.553766	0.283949
BTG1-DT	QSER1	-0.0359495	0.946248
BTG1-DT	RADX	0.593595	0.248128
BTG1-DT	RASL10B	-0.619751	0.226206
BTG1-DT	RASSF2	-0.557844	0.280261
BTG1-DT	RBP1	-0.548701	0.288305
BTG1-DT	RGL1	0.454324	0.38154
BTG1-DT	RIMS4	-0.732303	0.13805
BTG1-DT	RNF133	0.316848	0.546389
BTG1-DT	ROPN1L	0.626752	0.220106
BTG1-DT	ROS1	-0.480318	0.353845
BTG1-DT	RPL3L	0.26741	0.612103
BTG1-DT	RYR2	-0.39004	0.455054
BTG1-DT	S100A3	-0.13309	0.802174
BTG1-DT	S1PR2	-0.565695	0.273249
BTG1-DT	SALL2	-0.444141	0.392787
BTG1-DT	SALL4	-0.519426	0.315433
BTG1-DT	SAMD10	-0.485798	0.348936
BTG1-DT	SBSPON	-0.540673	0.295935
BTG1-DT	SCARF2	0.548421	0.28841
BTG1-DT	SCMH1	-0.736154	0.135386
BTG1-DT	SCNN1A	-0.308155	0.557748
BTG1-DT	SDHAF2	0.241148	0.647428
BTG1-DT	SEC61A2	-0.547536	0.289295
BTG1-DT	SERPINI1	0.599785	0.243239
BTG1-DT	SERTAD1	0.497185	0.337426
BTG1-DT	SH2D3A	-0.671334	0.183951
BTG1-DT	SH3GL2	0.519993	0.314867
BTG1-DT	SHC4	0.600843	0.242364
BTG1-DT	SHKBP1	-0.685648	0.172337
BTG1-DT	SHOC1	-0.380867	0.46607
BTG1-DT	SIRPA	-0.39899	0.444383
BTG1-DT	SIRT1	0.382233	0.464468
BTG1-DT	SLC12A8	-0.584869	0.256299
BTG1-DT	SLC16A9	-0.52393	0.311322
BTG1-DT	SLC29A4	0.473969	0.360658
BTG1-DT	SLC2A5	-0.52127	0.313652
BTG1-DT	SLC38A5	0.384676	0.46146
BTG1-DT	SLC44A2	-0.485944	0.348924
BTG1-DT	SLC4A4	0.395131	0.448877
BTG1-DT	SMC1B	-0.442089	0.394714
BTG1-DT	SNCG	-0.601756	0.24152
BTG1-DT	SNTB1	-0.518057	0.316467
BTG1-DT	SORBS1	0.50056	0.334096
BTG1-DT	SORBS3	-0.484201	0.350287
BTG1-DT	SPACA9	-0.398574	0.444849
BTG1-DT	SPATA12	-0.560238	0.278335
BTG1-DT	SPEG	-0.723568	0.143781
BTG1-DT	SPINK4	-0.624692	0.221823
BTG1-DT	SPOCD1	-0.578243	0.262349
BTG1-DT	SPTBN2	-0.539531	0.297018
BTG1-DT	SRC	-0.617153	0.228351
BTG1-DT	SRD5A1	-0.53764	0.298825
BTG1-DT	STEAP4	-0.506534	0.32811
BTG1-DT	STK11	0.262665	0.618271
BTG1-DT	STOX1	0.43006	0.408489
BTG1-DT	SULT4A1	0.535391	0.300897
BTG1-DT	SYNC	-0.322206	0.539266
BTG1-DT	SYNPO	-0.634233	0.213816
BTG1-DT	SYTL2	0.362756	0.488959
BTG1-DT	TAGLN	-0.777664	0.109213
BTG1-DT	TAS2R19	0.670175	0.184741
BTG1-DT	TBKBP1	-0.55233	0.285108
BTG1-DT	TBXA2R	-0.761035	0.11881
BTG1-DT	TCEA3	-0.296995	0.572557
BTG1-DT	TEK	-0.649994	0.201236
BTG1-DT	TENM1	0.461326	0.373731
BTG1-DT	TENM2	-0.562405	0.276305
BTG1-DT	TET1	-0.694871	0.165533
BTG1-DT	TGFB1I1	-0.789267	0.101887
BTG1-DT	TGIF2-RAB5IF	-0.558536	0.279757
BTG1-DT	THAP8	0.618432	0.227272
BTG1-DT	THEMIS2	0.480214	0.353894
BTG1-DT	THRA	-0.594624	0.247421
BTG1-DT	TICAM2	-0.568815	0.27053
BTG1-DT	TIGD7	-0.692905	0.166913
BTG1-DT	TLE5	-0.670099	0.184784
BTG1-DT	TLL2	0.305453	0.561366
BTG1-DT	TLR3	-0.467256	0.367699
BTG1-DT	TMEM151B	-0.540301	0.296259
BTG1-DT	TMEM171	0.504327	0.330289
BTG1-DT	TMEM184A	-0.681076	0.175935
BTG1-DT	TMEM39B	0.597599	0.245092
BTG1-DT	TMEM54	-0.520963	0.313878
BTG1-DT	TNFSF10	-0.603648	0.240112
BTG1-DT	TNS2	-0.5263	0.309366
BTG1-DT	TP53I11	-0.59158	0.250035
BTG1-DT	TP63	-0.500941	0.333979
BTG1-DT	TRIM22	-0.682191	0.175206
BTG1-DT	TRIM29	-0.548432	0.28841
BTG1-DT	TRIM46	-0.574715	0.265388
BTG1-DT	TSPAN1	-0.540911	0.29576
BTG1-DT	TSPOAP1	-0.524483	0.310881
BTG1-DT	TXLNB	-0.37994	0.467135
BTG1-DT	UFC1	-0.350079	0.504423
BTG1-DT	UGT1A1	-0.572405	0.267464
BTG1-DT	UGT1A7	-0.448946	0.387545
BTG1-DT	UNC13D	-0.791542	0.100487
BTG1-DT	UROD	-0.725434	0.142469
BTG1-DT	USP43	-0.439954	0.397134
BTG1-DT	USP54	0.449649	0.386921
BTG1-DT	VIT	-0.508577	0.326136
BTG1-DT	VPS52	-0.682909	0.17464
BTG1-DT	VSTM5	-0.538151	0.298379
BTG1-DT	VWA7	-0.334438	0.523717
BTG1-DT	WFDC2	-0.579011	0.261943
BTG1-DT	WHRN	-0.798765	0.0962645
BTG1-DT	WNT4	0.660845	0.192578
BTG1-DT	YOD1	-0.751366	0.125116
BTG1-DT	YPEL1	0.566482	0.272634
BTG1-DT	ZAR1	-0.55941	0.278892
BTG1-DT	ZBTB2	-0.332822	0.525815
BTG1-DT	ZBTB38	-0.574921	0.265274
BTG1-DT	ZC3HAV1L	-0.570924	0.26878
BTG1-DT	ZHX2	-0.57179	0.268025
BTG1-DT	ZNF419	0.484008	0.350463
BTG1-DT	ZNF532	-0.176563	0.738838
BTG1-DT	ZNF837	0.499461	0.33502
CARMN	ABCA12	0.980034	0.00626828
CARMN	ABCB1	-0.90919	0.0337418
CARMN	ABCG4	-0.95701	0.0137056
CARMN	ABTB3	-0.935111	0.0221909
CARMN	ACKR3	0.984634	0.00495791
CARMN	ACSL5	0.972872	0.00823349
CARMN	ACTL8	0.977734	0.00679886
CARMN	ADAMTS10	0.958507	0.0132547
CARMN	ADAMTS8	0.997702	0.0018727
CARMN	ADCY1	-0.954268	0.0148172
CARMN	ADCY7	0.98383	0.00519034
CARMN	ADGRF4	0.988166	0.00433465
CARMN	ADGRL1	0.977451	0.00679975
CARMN	AGBL1	0.956364	0.013983
CARMN	AGTR1	-0.963528	0.0114172
CARMN	ALDH1A3	0.97821	0.00667166
CARMN	ALDH3B1	0.957827	0.0134635
CARMN	ALPP	0.884173	0.0467808
CARMN	ALS2CL	0.976668	0.00698601
CARMN	AMOT	-0.947355	0.0172487
CARMN	ANGPTL2	0.973055	0.00818431
CARMN	ANGPTL6	-0.970414	0.0089487
CARMN	ANO3	-0.992652	0.00343512
CARMN	ANO3-AS1	-0.992202	0.00344106
CARMN	ANXA10	0.991173	0.00358907
CARMN	ANXA8L1	0.953054	0.015342
CARMN	APBA1	-0.921928	0.0279546
CARMN	APOL1	0.969143	0.00936606
CARMN	ARHGEF16	0.953193	0.0153205
CARMN	ASIC1	0.994147	0.00323752
CARMN	ATOH8	0.98839	0.00424155
CARMN	ATP1A2	0.976106	0.00716605
CARMN	ATP1A3	-0.990361	0.00387985
CARMN	ATP1B2	-0.920273	0.0286822
CARMN	ATP6AP1	-0.817204	0.0851151
CARMN	B3GALT1	-0.929118	0.0247876
CARMN	B4GALNT4	0.991882	0.00350302
CARMN	BAIAP3	-0.998421	0.00134477
CARMN	BDKRB2	0.991126	0.00359497
CARMN	BSN	-0.962596	0.0117347
CARMN	C17orf113	0.932395	0.023417
CARMN	C1orf116	0.926177	0.0261271
CARMN	C1S	0.915464	0.0305929
CARMN	C3orf33	0.858118	0.0616474
CARMN	C4BPB	0.987798	0.00437718
CARMN	CA11	0.966461	0.0103089
CARMN	CA9	0.978024	0.00674543
CARMN	CABYR	-0.946205	0.0176515
CARMN	CASKIN1	0.941989	0.0194745
CARMN	CATSPER1	0.982404	0.00563016
CARMN	CBLN3	0.985021	0.00489614
CARMN	CC2D2A	0.988749	0.0042045
CARMN	CCDC102A	0.932224	0.0234721
CARMN	CDC42BPG	0.98678	0.0045885
CARMN	CDH19	-0.945507	0.0179753
CARMN	CDH3	0.971734	0.00852201
CARMN	CDK5R2	-0.854259	0.0636056
CARMN	CGREF1	0.977626	0.00679886
CARMN	CHD1L	0.990355	0.00387985
CARMN	CHRM4	-0.918306	0.0294652
CARMN	CLDN7	0.992333	0.00344106
CARMN	CLDN9	-0.934416	0.0225109
CARMN	CLIP3	-0.94997	0.0163513
CARMN	CLMP	0.994435	0.00319473
CARMN	CNKSR1	0.989062	0.00412676
CARMN	COL15A1	0.993425	0.00324707
CARMN	COL18A1	-0.877569	0.0504644
CARMN	COL3A1	0.986496	0.0045885
CARMN	COL4A5	-0.966303	0.0103489
CARMN	COL7A1	-0.863179	0.0588348
CARMN	COMMD7	0.962632	0.0117347
CARMN	COMTD1	0.976486	0.00705289
CARMN	CPNE7	0.941453	0.0196947
CARMN	CRISPLD2	-0.97564	0.00722465
CARMN	CRMP1	0.994559	0.00319473
CARMN	CRYL1	-0.99074	0.00374101
CARMN	CSDC2	0.978601	0.00663162
CARMN	CSGALNACT1	-0.964189	0.0110951
CARMN	CSPG4	0.993667	0.00324707
CARMN	CTNNA2	0.992402	0.00344106
CARMN	CTSS	0.958054	0.0133798
CARMN	CTSV	-0.986141	0.00465303
CARMN	CTXN1	0.970389	0.00895388
CARMN	CUX1	0.897541	0.0401867
CARMN	CXCL8	-0.97216	0.00844562
CARMN	CYB561	0.995772	0.00266142
CARMN	CYB5RL	0.98848	0.00421807
CARMN	CYP27C1	0.993527	0.00324707
CARMN	CYP4F11	-0.892362	0.0425876
CARMN	DACT3	-0.997443	0.0018727
CARMN	DAG1	0.889694	0.0439502
CARMN	DCN	0.985398	0.00475254
CARMN	DDX6	-0.9262	0.0261239
CARMN	DENND2D	0.990744	0.00374101
CARMN	DIO2	0.966893	0.0101186
CARMN	DMXL2	-0.825232	0.0800508
CARMN	DSC2	0.989522	0.00406105
CARMN	DTHD1	0.957284	0.0136263
CARMN	DTX4	0.986106	0.00465866
CARMN	DUOX1	0.954213	0.0148415
CARMN	DUSP5	-0.870027	0.0550632
CARMN	DUSP6	-0.997247	0.00203765
CARMN	E2F2	0.985867	0.00466714
CARMN	EDAR	0.977069	0.0069242
CARMN	EEF1A2	0.982868	0.00548032
CARMN	EEF1AKMT3	0.984684	0.00494932
CARMN	EEPD1	-0.957387	0.0136126
CARMN	EFR3B	-0.99675	0.00232385
CARMN	EGR1	-0.993908	0.00324707
CARMN	EIF5B	-0.99748	0.0018727
CARMN	ENO4	-0.884874	0.0463919
CARMN	ENPP1	-0.945256	0.0180626
CARMN	EPCAM	0.973631	0.00799879
CARMN	EPM2A	-0.947753	0.0171117
CARMN	EVPLL	0.882236	0.0479301
CARMN	EWSR1	-0.875367	0.0518398
CARMN	FAM131C	0.984175	0.00507457
CARMN	FAM171A1	0.993873	0.00324707
CARMN	FAM217B	-0.792345	0.100051
CARMN	FAM222A	-0.996583	0.00236735
CARMN	FBXL16	0.977468	0.00679886
CARMN	FEZ2	-0.974404	0.0076886
CARMN	FGFR3	-0.980777	0.00609392
CARMN	FIZ1	0.962002	0.0119198
CARMN	FKBP2	-0.875518	0.0517705
CARMN	FLT3LG	0.939681	0.0202694
CARMN	FMN2	0.918182	0.029511
CARMN	FSIP2	0.951448	0.0158827
CARMN	GALC	0.992423	0.00344106
CARMN	GALNT5	0.966037	0.0104209
CARMN	GALNTL6	0.976938	0.00693887
CARMN	GAREM2	0.992734	0.00341766
CARMN	GARIN5B	-0.958756	0.0131618
CARMN	GBP1	0.99418	0.00323752
CARMN	GIPC3	0.95149	0.0158786
CARMN	GJA3	-0.962081	0.0119013
CARMN	GLI1	0.974232	0.00775335
CARMN	GP6	-0.862977	0.0589111
CARMN	GPM6B	0.965401	0.0106363
CARMN	GPR146	-0.911051	0.0328133
CARMN	GPX7	0.924295	0.0269446
CARMN	GREM1	0.98282	0.00548239
CARMN	GRIN3B	0.895675	0.0410902
CARMN	GRM1	0.993579	0.00324707
CARMN	GRPEL2	-0.997418	0.0018727
CARMN	GSAP	0.949191	0.0166111
CARMN	GSTO2	0.985769	0.00466714
CARMN	GTF2F2	-0.984337	0.00502885
CARMN	H1-0	-0.996905	0.00228224
CARMN	H1-6	-0.987882	0.00437718
CARMN	H2AC7	0.901966	0.0375804
CARMN	H2BC9	-0.892099	0.0427291
CARMN	H3-7	-0.935184	0.022154
CARMN	HAL	-0.952964	0.0153665
CARMN	HEY2	-0.982832	0.00548239
CARMN	HPCAL4	-0.894472	0.0416845
CARMN	HRCT1	0.957339	0.0136165
CARMN	HRH3	-0.8104	0.0889948
CARMN	HSBP1L1	0.887976	0.0449219
CARMN	HSD3B7	0.99526	0.00297222
CARMN	HSF2BP	0.980205	0.00625823
CARMN	HTR1D	0.954343	0.0147912
CARMN	ICOSLG	0.935256	0.0221179
CARMN	IFI44	0.903612	0.0367703
CARMN	IFI44L	0.949585	0.0164623
CARMN	IFITM1	0.989629	0.00401
CARMN	IFITM2	0.985887	0.00466714
CARMN	IFNB1	-0.81436	0.0866844
CARMN	IGF2	-0.972735	0.00827701
CARMN	IGFBP5	0.987423	0.00440221
CARMN	IL1A	0.966001	0.0104233
CARMN	IL27RA	0.973349	0.0080721
CARMN	IL7R	0.951956	0.0157355
CARMN	IMPDH1	0.932418	0.0234143
CARMN	IRF7	-0.929188	0.0247787
CARMN	ISLR	0.977303	0.00683879
CARMN	ITGA2	-0.94695	0.0173876
CARMN	JPH2	0.980352	0.00624557
CARMN	JPH3	0.969625	0.00922975
CARMN	KAZALD1	0.97069	0.00882112
CARMN	KCNC4	0.99065	0.00376657
CARMN	KCNJ2	-0.974569	0.00762877
CARMN	KCNRG	-0.86076	0.0601555
CARMN	KCTD15	0.883309	0.0473457
CARMN	KIAA0319	-0.985768	0.00466714
CARMN	KIAA1522	0.984692	0.00494932
CARMN	KRT13	0.972926	0.00822002
CARMN	KRT19	0.993522	0.00324707
CARMN	KRT8	0.817916	0.0846357
CARMN	KRT80	0.972023	0.00846391
CARMN	LAMA1	0.976942	0.00693887
CARMN	LAMB3	0.993208	0.00324707
CARMN	LAMC3	0.984163	0.00507457
CARMN	LGSN	0.964721	0.0108654
CARMN	LIMS1	-0.848031	0.0667391
CARMN	LIMS2	0.948127	0.0170357
CARMN	LINC00640	-0.847245	0.0671777
CARMN	LRFN1	0.923141	0.0274041
CARMN	LRMDA	0.982077	0.00571525
CARMN	LRP1	0.989024	0.00413363
CARMN	LRP11	-0.910601	0.0330235
CARMN	LRP3	0.983632	0.00525215
CARMN	LRRC3	0.919592	0.0288871
CARMN	LYRM9	-0.89711	0.0404017
CARMN	MAMDC2	0.99012	0.00393662
CARMN	MAN1C1	-0.970962	0.00875417
CARMN	MAP1A	-0.923137	0.0274041
CARMN	MAPK3	0.92305	0.027442
CARMN	MARCHF3	-0.983897	0.00516924
CARMN	MDGA1	-0.980481	0.00620727
CARMN	METTL7B	0.804935	0.092555
CARMN	MEX3A	0.962575	0.0117347
CARMN	MFAP2	0.846627	0.0674924
CARMN	MGAT4A	-0.933221	0.023109
CARMN	MIER3	-0.8722	0.0536419
CARMN	MISP	0.959307	0.0129538
CARMN	MMP1	-0.961469	0.0121051
CARMN	MMP2	0.836672	0.0732748
CARMN	MMRN2	0.979806	0.00631423
CARMN	MORN4	0.833468	0.0752665
CARMN	MPL	-0.789546	0.101733
CARMN	MRAP2	0.972551	0.00830085
CARMN	MRGPRE	0.962461	0.0117402
CARMN	MT-ATP6	-0.991456	0.00358907
CARMN	MTSS2	0.957775	0.0134635
CARMN	MVB12B	0.951893	0.0157648
CARMN	MYL9	0.991632	0.0035814
CARMN	MYO16	0.994053	0.00323828
CARMN	MYO1D	-0.968222	0.00957956
CARMN	MYO5C	0.988749	0.0042045
CARMN	MYPN	0.989197	0.00411528
CARMN	N4BP3	0.986748	0.0045885
CARMN	NAV1	0.966976	0.0100876
CARMN	NBPF4	0.981854	0.00577429
CARMN	NBPF6	0.893599	0.0420566
CARMN	NCKAP5	0.983015	0.00545125
CARMN	NECAB2	-0.945049	0.018098
CARMN	NFATC1	0.91361	0.0314603
CARMN	NFATC4	0.991496	0.00358907
CARMN	NFE2	0.975413	0.00727733
CARMN	NFYA	-0.828895	0.0778519
CARMN	NGFR	-0.930803	0.02407
CARMN	NIPAL2	0.936542	0.0215496
CARMN	NIPAL4	0.945041	0.018098
CARMN	NOTUM	0.947742	0.0171117
CARMN	NPR1	0.986468	0.0045885
CARMN	NPTXR	-0.971151	0.00870364
CARMN	NPY4R	0.974361	0.00770485
CARMN	NPY4R2	0.954444	0.0147899
CARMN	NQO1	-0.988887	0.00418271
CARMN	NR5A2	-0.962594	0.0117347
CARMN	NRIP3	-0.968414	0.00950741
CARMN	NSFL1C	-0.880288	0.0490203
CARMN	NYNRIN	0.997715	0.0018727
CARMN	OASL	0.976564	0.00701602
CARMN	OLFM4	0.980558	0.00618924
CARMN	OSGIN1	-0.992456	0.00344106
CARMN	OTUD7A	-0.960179	0.0126125
CARMN	P2RY4	-0.971212	0.00869532
CARMN	PAG1	-0.997528	0.0018727
CARMN	PALD1	0.9503	0.0162816
CARMN	PALM	0.984664	0.00494932
CARMN	PALMD	0.958198	0.0133535
CARMN	PAPPA2	0.972681	0.00829041
CARMN	PARP10	0.886343	0.0456736
CARMN	PAX5	-0.962683	0.0117347
CARMN	PCDHB11	0.952011	0.0157112
CARMN	PCDHB13	0.980349	0.00624557
CARMN	PCDHB14	0.989186	0.00411528
CARMN	PCDHGA10	0.943734	0.0186741
CARMN	PCDHGA4	0.982802	0.00548239
CARMN	PCDHGA5	0.965323	0.0106469
CARMN	PCDHGA6	0.962189	0.0118444
CARMN	PCDHGA7	0.935019	0.0222408
CARMN	PCDHGB2	0.94201	0.0194745
CARMN	PCDHGB6	0.998956	0.00134477
CARMN	PCP2	0.989647	0.00401
CARMN	PCSK1	0.990176	0.00392177
CARMN	PDE1A	0.966806	0.0101418
CARMN	PDE4A	0.96615	0.010372
CARMN	PDGFB	0.955307	0.0143847
CARMN	PDGFRB	0.930305	0.0242064
CARMN	PDLIM2	0.995801	0.00266142
CARMN	PDZD2	0.941846	0.0195411
CARMN	PGF	-0.857294	0.0620056
CARMN	PIEZO1	-0.824061	0.0807848
CARMN	PINLYP	-0.893645	0.0420544
CARMN	PIP5K1B	-0.937212	0.0212745
CARMN	PKP3	0.975496	0.00723766
CARMN	PLAAT4	0.999673	0.00070183
CARMN	PLAC8L1	0.902788	0.0371031
CARMN	PLEKHA4	0.984413	0.00500139
CARMN	PLK2	0.986749	0.0045885
CARMN	PNPLA2	-0.853908	0.0637573
CARMN	POC1B-GALNT4	0.991112	0.00359497
CARMN	POLR2J3	-0.92434	0.0269268
CARMN	POU4F3	-0.984671	0.00494932
CARMN	PPAN-P2RY11	-0.78094	0.106974
CARMN	PPM1J	-0.958482	0.0132602
CARMN	PPP1R14C	-0.968817	0.00942258
CARMN	PRH2	0.946031	0.0177199
CARMN	PRLR	0.973885	0.00788693
CARMN	PRRX1	0.990482	0.00382862
CARMN	PSG5	0.972546	0.00830085
CARMN	PTCHD4	0.973633	0.00799879
CARMN	PTPRQ	0.981685	0.00580385
CARMN	PWWP2B	0.986177	0.00465303
CARMN	QSER1	0.790034	0.101464
CARMN	RADX	-0.908004	0.0343414
CARMN	RASL10B	0.981688	0.00580385
CARMN	RASSF2	0.976137	0.00716605
CARMN	RBP1	0.99277	0.00341766
CARMN	RGL1	-0.946319	0.0176234
CARMN	RIMS4	0.952249	0.0156249
CARMN	RNF133	-0.866613	0.0569598
CARMN	ROPN1L	-0.923044	0.027442
CARMN	ROS1	0.990744	0.00374101
CARMN	RPL3L	-0.781697	0.106532
CARMN	RYR2	0.963208	0.0115189
CARMN	S100A3	0.869263	0.0555787
CARMN	S1PR2	0.984953	0.00490666
CARMN	SALL2	0.972174	0.00844562
CARMN	SALL4	0.995028	0.00304944
CARMN	SAMD10	0.988461	0.00421807
CARMN	SBSPON	0.958229	0.013353
CARMN	SCARF2	-0.952624	0.0154941
CARMN	SCMH1	0.962348	0.0117869
CARMN	SCNN1A	0.954344	0.0147912
CARMN	SDHAF2	-0.891962	0.0428172
CARMN	SEC61A2	0.966382	0.0103291
CARMN	SERPINI1	-0.968685	0.00943515
CARMN	SERTAD1	-0.979069	0.00650342
CARMN	SH2D3A	0.977487	0.00679886
CARMN	SH3GL2	-0.980103	0.00626828
CARMN	SHC4	-0.959468	0.0128947
CARMN	SHKBP1	0.962713	0.0117347
CARMN	SHOC1	0.970985	0.00875184
CARMN	SIRPA	0.971454	0.00859363
CARMN	SIRT1	-0.879259	0.0495842
CARMN	SLC12A8	0.963112	0.0115454
CARMN	SLC16A9	0.979229	0.00648126
CARMN	SLC29A4	-0.961312	0.0121864
CARMN	SLC2A5	0.992063	0.00344106
CARMN	SLC38A5	-0.857477	0.0618977
CARMN	SLC44A2	0.993122	0.00324707
CARMN	SLC4A4	-0.76191	0.118288
CARMN	SMC1B	0.948233	0.0170076
CARMN	SNCG	0.97834	0.00665191
CARMN	SNTB1	0.987773	0.00437718
CARMN	SORBS1	-0.983552	0.00528041
CARMN	SORBS3	0.984518	0.00498973
CARMN	SPACA9	0.91777	0.0296921
CARMN	SPATA12	0.98658	0.0045885
CARMN	SPEG	0.959947	0.0126955
CARMN	SPINK4	0.928751	0.024931
CARMN	SPOCD1	0.965029	0.0107853
CARMN	SPTBN2	0.994604	0.00319473
CARMN	SRC	0.979422	0.00644302
CARMN	SRD5A1	0.83247	0.075848
CARMN	STEAP4	0.987693	0.00437718
CARMN	STK11	-0.848251	0.0666944
CARMN	STOX1	-0.950246	0.0162816
CARMN	SULT4A1	-0.996533	0.00238688
CARMN	SYNC	0.934299	0.0225522
CARMN	SYNPO	0.984843	0.00491124
CARMN	SYTL2	-0.940769	0.0198976
CARMN	TAGLN	0.902748	0.0371031
CARMN	TAS2R19	-0.978237	0.00667166
CARMN	TBKBP1	0.983845	0.00519034
CARMN	TBXA2R	0.942916	0.0190359
CARMN	TCEA3	0.935956	0.0217955
CARMN	TEK	0.986382	0.00458992
CARMN	TENM1	-0.980058	0.00626828
CARMN	TENM2	0.992612	0.00344009
CARMN	TET1	0.956545	0.0139029
CARMN	TGFB1I1	0.896095	0.0409227
CARMN	TGIF2-RAB5IF	0.989133	0.00412662
CARMN	THAP8	-0.920112	0.0287292
CARMN	THEMIS2	-0.847718	0.0669431
CARMN	THRA	0.98886	0.00418271
CARMN	TICAM2	0.997415	0.0018727
CARMN	TIGD7	0.960275	0.0126125
CARMN	TLE5	0.968698	0.00943515
CARMN	TLL2	-0.842988	0.0694112
CARMN	TLR3	0.972551	0.00830085
CARMN	TMEM151B	0.969484	0.00923646
CARMN	TMEM171	-0.929097	0.0247888
CARMN	TMEM184A	0.987113	0.00446902
CARMN	TMEM39B	-0.892345	0.0425876
CARMN	TMEM54	0.981796	0.0057759
CARMN	TNFSF10	0.98049	0.00620727
CARMN	TNS2	0.977581	0.00679886
CARMN	TP53I11	0.989985	0.00394336
CARMN	TP63	0.984122	0.00509017
CARMN	TRIM22	0.97692	0.00693887
CARMN	TRIM29	0.992344	0.00344106
CARMN	TRIM46	0.998461	0.00134477
CARMN	TSPAN1	0.937627	0.0211215
CARMN	TSPOAP1	0.986488	0.0045885
CARMN	TXLNB	0.93557	0.0219682
CARMN	UFC1	0.951367	0.0159124
CARMN	UGT1A1	0.992747	0.00341766
CARMN	UGT1A7	0.984206	0.00507457
CARMN	UNC13D	0.946363	0.0176178
CARMN	UROD	0.948329	0.0169601
CARMN	USP43	0.951664	0.0158338
CARMN	USP54	-0.917005	0.0299559
CARMN	VIT	0.992254	0.00344106
CARMN	VPS52	0.853295	0.0640573
CARMN	VSTM5	0.962533	0.0117379
CARMN	VWA7	0.90976	0.033444
CARMN	WFDC2	0.99671	0.00232385
CARMN	WHRN	0.888519	0.0446105
CARMN	WNT4	-0.962598	0.0117347
CARMN	YOD1	0.815394	0.0862277
CARMN	YPEL1	-0.97729	0.00683879
CARMN	ZAR1	0.989436	0.0040789
CARMN	ZBTB2	0.851684	0.0648181
CARMN	ZBTB38	0.991199	0.00358907
CARMN	ZC3HAV1L	0.991239	0.00358907
CARMN	ZHX2	0.981826	0.00577429
CARMN	ZNF419	-0.902804	0.0371031
CARMN	ZNF532	0.867324	0.0565553
CARMN	ZNF837	-0.821136	0.0825256
DNAJC3-DT	ABCA12	-0.490686	0.344204
DNAJC3-DT	ABCB1	0.356395	0.496313
DNAJC3-DT	ABCG4	0.652085	0.19954
DNAJC3-DT	ABTB3	0.404353	0.437957
DNAJC3-DT	ACKR3	-0.462472	0.372683
DNAJC3-DT	ACSL5	-0.478427	0.355916
DNAJC3-DT	ACTL8	-0.490144	0.344656
DNAJC3-DT	ADAMTS10	-0.627531	0.219295
DNAJC3-DT	ADAMTS8	-0.526789	0.309059
DNAJC3-DT	ADCY1	0.493604	0.341121
DNAJC3-DT	ADCY7	-0.575056	0.265236
DNAJC3-DT	ADGRF4	-0.570656	0.268992
DNAJC3-DT	ADGRL1	-0.55393	0.283808
DNAJC3-DT	AGBL1	-0.69115	0.168209
DNAJC3-DT	AGTR1	0.500746	0.333979
DNAJC3-DT	ALDH1A3	-0.646083	0.204477
DNAJC3-DT	ALDH3B1	-0.345234	0.510183
DNAJC3-DT	ALPP	-0.260954	0.620576
DNAJC3-DT	ALS2CL	-0.628787	0.218129
DNAJC3-DT	AMOT	0.557144	0.280874
DNAJC3-DT	ANGPTL2	-0.577049	0.263536
DNAJC3-DT	ANGPTL6	0.536575	0.299817
DNAJC3-DT	ANO3	0.512956	0.32189
DNAJC3-DT	ANO3-AS1	0.526739	0.309059
DNAJC3-DT	ANXA10	-0.549331	0.287804
DNAJC3-DT	ANXA8L1	-0.564232	0.274644
DNAJC3-DT	APBA1	0.410875	0.430485
DNAJC3-DT	APOL1	-0.621888	0.22424
DNAJC3-DT	ARHGEF16	-0.572051	0.267822
DNAJC3-DT	ASIC1	-0.516443	0.318251
DNAJC3-DT	ATOH8	-0.478261	0.356001
DNAJC3-DT	ATP1A2	-0.484927	0.349637
DNAJC3-DT	ATP1A3	0.529883	0.306346
DNAJC3-DT	ATP1B2	0.611839	0.232776
DNAJC3-DT	ATP6AP1	0.46903	0.365879
DNAJC3-DT	B3GALT1	0.622025	0.22424
DNAJC3-DT	B4GALNT4	-0.574565	0.265465
DNAJC3-DT	BAIAP3	0.556539	0.281476
DNAJC3-DT	BDKRB2	-0.495288	0.339261
DNAJC3-DT	BSN	0.513971	0.320785
DNAJC3-DT	C17orf113	-0.78602	0.103721
DNAJC3-DT	C1orf116	-0.184775	0.72702
DNAJC3-DT	C1S	-0.612246	0.232489
DNAJC3-DT	C3orf33	-0.858085	0.0616474
DNAJC3-DT	C4BPB	-0.575008	0.265243
DNAJC3-DT	CA11	-0.686201	0.171942
DNAJC3-DT	CA9	-0.581822	0.259158
DNAJC3-DT	CABYR	0.300565	0.567818
DNAJC3-DT	CASKIN1	-0.437606	0.399695
DNAJC3-DT	CATSPER1	-0.512564	0.322249
DNAJC3-DT	CBLN3	-0.648581	0.202496
DNAJC3-DT	CC2D2A	-0.48286	0.351452
DNAJC3-DT	CCDC102A	-0.301783	0.566231
DNAJC3-DT	CDC42BPG	-0.499317	0.335136
DNAJC3-DT	CDH19	0.594968	0.247351
DNAJC3-DT	CDH3	-0.436384	0.401036
DNAJC3-DT	CDK5R2	0.28381	0.59045
DNAJC3-DT	CGREF1	-0.641382	0.20818
DNAJC3-DT	CHD1L	-0.503993	0.330634
DNAJC3-DT	CHRM4	0.292755	0.578231
DNAJC3-DT	CLDN7	-0.520423	0.314465
DNAJC3-DT	CLDN9	0.364769	0.486586
DNAJC3-DT	CLIP3	0.629105	0.217947
DNAJC3-DT	CLMP	-0.553198	0.284509
DNAJC3-DT	CNKSR1	-0.596585	0.246072
DNAJC3-DT	COL15A1	-0.521624	0.313414
DNAJC3-DT	COL18A1	0.348346	0.506501
DNAJC3-DT	COL3A1	-0.626473	0.220371
DNAJC3-DT	COL4A5	0.498565	0.335986
DNAJC3-DT	COL7A1	0.251688	0.633127
DNAJC3-DT	COMMD7	-0.530477	0.305802
DNAJC3-DT	COMTD1	-0.575525	0.264794
DNAJC3-DT	CPNE7	-0.656056	0.196493
DNAJC3-DT	CRISPLD2	0.470511	0.36424
DNAJC3-DT	CRMP1	-0.537089	0.299368
DNAJC3-DT	CRYL1	0.441169	0.395739
DNAJC3-DT	CSDC2	-0.442473	0.394426
DNAJC3-DT	CSGALNACT1	0.49318	0.341526
DNAJC3-DT	CSPG4	-0.563069	0.275742
DNAJC3-DT	CTNNA2	-0.499744	0.334764
DNAJC3-DT	CTSS	-0.676781	0.179397
DNAJC3-DT	CTSV	0.591261	0.25035
DNAJC3-DT	CTXN1	-0.450111	0.386408
DNAJC3-DT	CUX1	-0.656453	0.196109
DNAJC3-DT	CXCL8	0.548991	0.288099
DNAJC3-DT	CYB561	-0.550694	0.286469
DNAJC3-DT	CYB5RL	-0.545837	0.290816
DNAJC3-DT	CYP27C1	-0.545563	0.291048
DNAJC3-DT	CYP4F11	0.464615	0.370466
DNAJC3-DT	DACT3	0.552295	0.285108
DNAJC3-DT	DAG1	-0.435186	0.402348
DNAJC3-DT	DCN	-0.452918	0.383226
DNAJC3-DT	DDX6	0.309803	0.555666
DNAJC3-DT	DENND2D	-0.574	0.26597
DNAJC3-DT	DIO2	-0.621051	0.224976
DNAJC3-DT	DMXL2	0.40457	0.437749
DNAJC3-DT	DSC2	-0.467573	0.36743
DNAJC3-DT	DTHD1	-0.608766	0.235584
DNAJC3-DT	DTX4	-0.420721	0.419
DNAJC3-DT	DUOX1	-0.596461	0.246076
DNAJC3-DT	DUSP5	0.51177	0.323032
DNAJC3-DT	DUSP6	0.527183	0.308789
DNAJC3-DT	E2F2	-0.554788	0.283014
DNAJC3-DT	EDAR	-0.490802	0.34412
DNAJC3-DT	EEF1A2	-0.424783	0.414442
DNAJC3-DT	EEF1AKMT3	-0.648193	0.202779
DNAJC3-DT	EEPD1	0.391716	0.453093
DNAJC3-DT	EFR3B	0.519704	0.315157
DNAJC3-DT	EGR1	0.569121	0.270226
DNAJC3-DT	EIF5B	0.545422	0.291148
DNAJC3-DT	ENO4	0.472268	0.362503
DNAJC3-DT	ENPP1	0.40327	0.439211
DNAJC3-DT	EPCAM	-0.442657	0.394389
DNAJC3-DT	EPM2A	0.33663	0.521093
DNAJC3-DT	EVPLL	-0.263554	0.617219
DNAJC3-DT	EWSR1	0.559878	0.278646
DNAJC3-DT	FAM131C	-0.420573	0.419121
DNAJC3-DT	FAM171A1	-0.543732	0.292847
DNAJC3-DT	FAM217B	0.457748	0.377602
DNAJC3-DT	FAM222A	0.529403	0.306755
DNAJC3-DT	FBXL16	-0.575633	0.264718
DNAJC3-DT	FEZ2	0.524279	0.311069
DNAJC3-DT	FGFR3	0.461491	0.373651
DNAJC3-DT	FIZ1	-0.56961	0.269905
DNAJC3-DT	FKBP2	0.393939	0.450351
DNAJC3-DT	FLT3LG	-0.229909	0.663194
DNAJC3-DT	FMN2	-0.241607	0.64698
DNAJC3-DT	FSIP2	-0.636769	0.211607
DNAJC3-DT	GALC	-0.594165	0.247848
DNAJC3-DT	GALNT5	-0.534153	0.302251
DNAJC3-DT	GALNTL6	-0.53209	0.304266
DNAJC3-DT	GAREM2	-0.485192	0.349431
DNAJC3-DT	GARIN5B	0.282252	0.592523
DNAJC3-DT	GBP1	-0.459663	0.375541
DNAJC3-DT	GIPC3	-0.607262	0.236858
DNAJC3-DT	GJA3	0.512052	0.32275
DNAJC3-DT	GLI1	-0.442246	0.394647
DNAJC3-DT	GP6	0.559356	0.278906
DNAJC3-DT	GPM6B	-0.471266	0.363553
DNAJC3-DT	GPR146	0.428232	0.410671
DNAJC3-DT	GPX7	-0.731561	0.138482
DNAJC3-DT	GREM1	-0.398265	0.445178
DNAJC3-DT	GRIN3B	-0.674587	0.181144
DNAJC3-DT	GRM1	-0.567283	0.272002
DNAJC3-DT	GRPEL2	0.496486	0.338155
DNAJC3-DT	GSAP	-0.375977	0.472035
DNAJC3-DT	GSTO2	-0.524549	0.310856
DNAJC3-DT	GTF2F2	0.54648	0.290218
DNAJC3-DT	H1-0	0.533281	0.303122
DNAJC3-DT	H1-6	0.589706	0.251648
DNAJC3-DT	H2AC7	-0.731144	0.138707
DNAJC3-DT	H2BC9	0.500555	0.334096
DNAJC3-DT	H3-7	0.557315	0.280725
DNAJC3-DT	HAL	0.473438	0.361248
DNAJC3-DT	HEY2	0.532354	0.304044
DNAJC3-DT	HPCAL4	0.605046	0.238901
DNAJC3-DT	HRCT1	-0.413926	0.426982
DNAJC3-DT	HRH3	0.504625	0.330042
DNAJC3-DT	HSBP1L1	-0.382082	0.464555
DNAJC3-DT	HSD3B7	-0.557997	0.280183
DNAJC3-DT	HSF2BP	-0.443455	0.393518
DNAJC3-DT	HTR1D	-0.574849	0.265283
DNAJC3-DT	ICOSLG	-0.578696	0.262139
DNAJC3-DT	IFI44	-0.135021	0.799454
DNAJC3-DT	IFI44L	-0.537374	0.299085
DNAJC3-DT	IFITM1	-0.594743	0.247419
DNAJC3-DT	IFITM2	-0.413777	0.427043
DNAJC3-DT	IFNB1	0.214064	0.685317
DNAJC3-DT	IGF2	0.487034	0.347888
DNAJC3-DT	IGFBP5	-0.621298	0.224797
DNAJC3-DT	IL1A	-0.448042	0.388547
DNAJC3-DT	IL27RA	-0.346439	0.508731
DNAJC3-DT	IL7R	-0.58035	0.260508
DNAJC3-DT	IMPDH1	-0.72536	0.14248
DNAJC3-DT	IRF7	0.375144	0.473053
DNAJC3-DT	ISLR	-0.595182	0.247155
DNAJC3-DT	ITGA2	0.526771	0.309059
DNAJC3-DT	JPH2	-0.656865	0.195823
DNAJC3-DT	JPH3	-0.364085	0.487353
DNAJC3-DT	KAZALD1	-0.356735	0.496013
DNAJC3-DT	KCNC4	-0.531054	0.305233
DNAJC3-DT	KCNJ2	0.491907	0.342953
DNAJC3-DT	KCNRG	0.57467	0.265393
DNAJC3-DT	KCTD15	-0.570345	0.269301
DNAJC3-DT	KIAA0319	0.632554	0.215244
DNAJC3-DT	KIAA1522	-0.56602	0.273069
DNAJC3-DT	KRT13	-0.486418	0.348463
DNAJC3-DT	KRT19	-0.591172	0.250359
DNAJC3-DT	KRT8	-0.895833	0.0410023
DNAJC3-DT	KRT80	-0.604639	0.239223
DNAJC3-DT	LAMA1	-0.382599	0.464102
DNAJC3-DT	LAMB3	-0.5575	0.280561
DNAJC3-DT	LAMC3	-0.64552	0.204907
DNAJC3-DT	LGSN	-0.497909	0.336665
DNAJC3-DT	LIMS1	0.496042	0.338408
DNAJC3-DT	LIMS2	-0.678865	0.177659
DNAJC3-DT	LINC00640	0.222289	0.673647
DNAJC3-DT	LRFN1	-0.32223	0.539266
DNAJC3-DT	LRMDA	-0.452013	0.384227
DNAJC3-DT	LRP1	-0.599986	0.243058
DNAJC3-DT	LRP11	0.559545	0.278835
DNAJC3-DT	LRP3	-0.410229	0.431175
DNAJC3-DT	LRRC3	-0.782396	0.106175
DNAJC3-DT	LYRM9	0.607283	0.236858
DNAJC3-DT	MAMDC2	-0.51878	0.315859
DNAJC3-DT	MAN1C1	0.450709	0.385726
DNAJC3-DT	MAP1A	0.387085	0.458611
DNAJC3-DT	MAPK3	-0.196668	0.710141
DNAJC3-DT	MARCHF3	0.481226	0.352973
DNAJC3-DT	MDGA1	0.543454	0.29309
DNAJC3-DT	METTL7B	-0.18773	0.72285
DNAJC3-DT	MEX3A	-0.636909	0.211495
DNAJC3-DT	MFAP2	-0.658782	0.19424
DNAJC3-DT	MGAT4A	0.438817	0.398367
DNAJC3-DT	MIER3	0.385567	0.460518
DNAJC3-DT	MISP	-0.716666	0.148697
DNAJC3-DT	MMP1	0.500813	0.333979
DNAJC3-DT	MMP2	-0.63471	0.213519
DNAJC3-DT	MMRN2	-0.62292	0.22335
DNAJC3-DT	MORN4	-0.84231	0.0698427
DNAJC3-DT	MPL	0.318221	0.544604
DNAJC3-DT	MRAP2	-0.637015	0.211442
DNAJC3-DT	MRGPRE	-0.468649	0.366287
DNAJC3-DT	MT-ATP6	0.519093	0.315667
DNAJC3-DT	MTSS2	-0.35984	0.492283
DNAJC3-DT	MVB12B	-0.542478	0.29413
DNAJC3-DT	MYL9	-0.493665	0.34111
DNAJC3-DT	MYO16	-0.539908	0.296626
DNAJC3-DT	MYO1D	0.694264	0.165983
DNAJC3-DT	MYO5C	-0.430999	0.407434
DNAJC3-DT	MYPN	-0.500052	0.334534
DNAJC3-DT	N4BP3	-0.517968	0.316519
DNAJC3-DT	NAV1	-0.503452	0.331172
DNAJC3-DT	NBPF4	-0.576907	0.26364
DNAJC3-DT	NBPF6	-0.610189	0.234306
DNAJC3-DT	NCKAP5	-0.644475	0.205772
DNAJC3-DT	NECAB2	0.389661	0.455402
DNAJC3-DT	NFATC1	-0.226146	0.668246
DNAJC3-DT	NFATC4	-0.617342	0.228271
DNAJC3-DT	NFE2	-0.491467	0.34343
DNAJC3-DT	NFYA	0.523011	0.312038
DNAJC3-DT	NGFR	0.550579	0.286553
DNAJC3-DT	NIPAL2	-0.258128	0.624353
DNAJC3-DT	NIPAL4	-0.719885	0.14637
DNAJC3-DT	NOTUM	-0.447868	0.388637
DNAJC3-DT	NPR1	-0.433126	0.404813
DNAJC3-DT	NPTXR	0.472184	0.362547
DNAJC3-DT	NPY4R	-0.414535	0.426351
DNAJC3-DT	NPY4R2	-0.295998	0.573841
DNAJC3-DT	NQO1	0.515756	0.318987
DNAJC3-DT	NR5A2	0.513927	0.320785
DNAJC3-DT	NRIP3	0.487981	0.346911
DNAJC3-DT	NSFL1C	0.458273	0.377014
DNAJC3-DT	NYNRIN	-0.54949	0.287669
DNAJC3-DT	OASL	-0.573631	0.266297
DNAJC3-DT	OLFM4	-0.500747	0.333979
DNAJC3-DT	OSGIN1	0.467968	0.367005
DNAJC3-DT	OTUD7A	0.559677	0.27878
DNAJC3-DT	P2RY4	0.606331	0.237686
DNAJC3-DT	PAG1	0.508383	0.326313
DNAJC3-DT	PALD1	-0.304918	0.562011
DNAJC3-DT	PALM	-0.522482	0.312463
DNAJC3-DT	PALMD	-0.361904	0.489934
DNAJC3-DT	PAPPA2	-0.467048	0.367895
DNAJC3-DT	PARP10	-0.2307	0.662171
DNAJC3-DT	PAX5	0.523745	0.311456
DNAJC3-DT	PCDHB11	-0.652958	0.198916
DNAJC3-DT	PCDHB13	-0.463615	0.371456
DNAJC3-DT	PCDHB14	-0.451577	0.384707
DNAJC3-DT	PCDHGA10	-0.46275	0.372402
DNAJC3-DT	PCDHGA4	-0.536828	0.299623
DNAJC3-DT	PCDHGA5	-0.677153	0.179082
DNAJC3-DT	PCDHGA6	-0.399094	0.444326
DNAJC3-DT	PCDHGA7	-0.270817	0.607815
DNAJC3-DT	PCDHGB2	-0.356681	0.496013
DNAJC3-DT	PCDHGB6	-0.541245	0.29542
DNAJC3-DT	PCP2	-0.506237	0.328386
DNAJC3-DT	PCSK1	-0.57847	0.262278
DNAJC3-DT	PDE1A	-0.407639	0.434291
DNAJC3-DT	PDE4A	-0.701143	0.16069
DNAJC3-DT	PDGFB	-0.636995	0.211442
DNAJC3-DT	PDGFRB	-0.751765	0.124879
DNAJC3-DT	PDLIM2	-0.508876	0.325943
DNAJC3-DT	PDZD2	-0.241377	0.647205
DNAJC3-DT	PGF	0.600686	0.242439
DNAJC3-DT	PIEZO1	0.434344	0.403344
DNAJC3-DT	PINLYP	0.25016	0.635185
DNAJC3-DT	PIP5K1B	0.571925	0.267918
DNAJC3-DT	PKP3	-0.397506	0.446016
DNAJC3-DT	PLAAT4	-0.5355	0.300834
DNAJC3-DT	PLAC8L1	-0.72972	0.139582
DNAJC3-DT	PLEKHA4	-0.488072	0.346858
DNAJC3-DT	PLK2	-0.471107	0.363689
DNAJC3-DT	PNPLA2	0.345678	0.509668
DNAJC3-DT	POC1B-GALNT4	-0.515532	0.319199
DNAJC3-DT	POLR2J3	0.496073	0.338408
DNAJC3-DT	POU4F3	0.619442	0.226462
DNAJC3-DT	PPAN-P2RY11	0.280123	0.595393
DNAJC3-DT	PPM1J	0.427151	0.411908
DNAJC3-DT	PPP1R14C	0.361784	0.490014
DNAJC3-DT	PRH2	-0.461823	0.373301
DNAJC3-DT	PRLR	-0.405614	0.436616
DNAJC3-DT	PRRX1	-0.518965	0.315711
DNAJC3-DT	PSG5	-0.480406	0.353796
DNAJC3-DT	PTCHD4	-0.349795	0.504722
DNAJC3-DT	PTPRQ	-0.559113	0.279137
DNAJC3-DT	PWWP2B	-0.526098	0.3095
DNAJC3-DT	QSER1	-0.0188863	0.971674
DNAJC3-DT	RADX	0.518617	0.31591
DNAJC3-DT	RASL10B	-0.5739	0.266037
DNAJC3-DT	RASSF2	-0.485017	0.349585
DNAJC3-DT	RBP1	-0.505443	0.329172
DNAJC3-DT	RGL1	0.376338	0.471635
DNAJC3-DT	RIMS4	-0.704446	0.158123
DNAJC3-DT	RNF133	0.269174	0.60973
DNAJC3-DT	ROPN1L	0.5269	0.309029
DNAJC3-DT	ROS1	-0.439899	0.397138
DNAJC3-DT	RPL3L	0.271967	0.606309
DNAJC3-DT	RYR2	-0.347266	0.507866
DNAJC3-DT	S100A3	-0.0818108	0.877834
DNAJC3-DT	S1PR2	-0.500788	0.333979
DNAJC3-DT	SALL2	-0.404691	0.437664
DNAJC3-DT	SALL4	-0.480181	0.353894
DNAJC3-DT	SAMD10	-0.440525	0.396482
DNAJC3-DT	SBSPON	-0.464113	0.370964
DNAJC3-DT	SCARF2	0.55802	0.280183
DNAJC3-DT	SCMH1	-0.715036	0.149937
DNAJC3-DT	SCNN1A	-0.262678	0.618271
DNAJC3-DT	SDHAF2	0.151529	0.7753
DNAJC3-DT	SEC61A2	-0.489284	0.345559
DNAJC3-DT	SERPINI1	0.535597	0.300811
DNAJC3-DT	SERTAD1	0.445418	0.391444
DNAJC3-DT	SH2D3A	-0.615213	0.230069
DNAJC3-DT	SH3GL2	0.480875	0.353342
DNAJC3-DT	SHC4	0.518986	0.315711
DNAJC3-DT	SHKBP1	-0.647685	0.203164
DNAJC3-DT	SHOC1	-0.328309	0.531498
DNAJC3-DT	SIRPA	-0.361911	0.489934
DNAJC3-DT	SIRT1	0.356162	0.496544
DNAJC3-DT	SLC12A8	-0.524034	0.31129
DNAJC3-DT	SLC16A9	-0.470541	0.36424
DNAJC3-DT	SLC29A4	0.391504	0.453297
DNAJC3-DT	SLC2A5	-0.490402	0.344434
DNAJC3-DT	SLC38A5	0.278994	0.596872
DNAJC3-DT	SLC44A2	-0.441556	0.395318
DNAJC3-DT	SLC4A4	0.359447	0.492649
DNAJC3-DT	SMC1B	-0.435906	0.401507
DNAJC3-DT	SNCG	-0.575385	0.264907
DNAJC3-DT	SNTB1	-0.460541	0.374578
DNAJC3-DT	SORBS1	0.437856	0.399445
DNAJC3-DT	SORBS3	-0.427077	0.411935
DNAJC3-DT	SPACA9	-0.336332	0.521411
DNAJC3-DT	SPATA12	-0.502175	0.332652
DNAJC3-DT	SPEG	-0.67974	0.176929
DNAJC3-DT	SPINK4	-0.594742	0.247419
DNAJC3-DT	SPOCD1	-0.538563	0.297947
DNAJC3-DT	SPTBN2	-0.49972	0.334764
DNAJC3-DT	SRC	-0.574269	0.265709
DNAJC3-DT	SRD5A1	-0.554028	0.283745
DNAJC3-DT	STEAP4	-0.449485	0.387063
DNAJC3-DT	STK11	0.27313	0.604868
DNAJC3-DT	STOX1	0.36076	0.491296
DNAJC3-DT	SULT4A1	0.485742	0.348936
DNAJC3-DT	SYNC	-0.252092	0.632657
DNAJC3-DT	SYNPO	-0.595842	0.246683
DNAJC3-DT	SYTL2	0.326331	0.533839
DNAJC3-DT	TAGLN	-0.765761	0.116522
DNAJC3-DT	TAS2R19	0.642897	0.207022
DNAJC3-DT	TBKBP1	-0.518717	0.315859
DNAJC3-DT	TBXA2R	-0.703386	0.158895
DNAJC3-DT	TCEA3	-0.258511	0.623913
DNAJC3-DT	TEK	-0.597981	0.244816
DNAJC3-DT	TENM1	0.413381	0.427412
DNAJC3-DT	TENM2	-0.524002	0.31129
DNAJC3-DT	TET1	-0.639166	0.210058
DNAJC3-DT	TGFB1I1	-0.718023	0.147884
DNAJC3-DT	TGIF2-RAB5IF	-0.522472	0.312463
DNAJC3-DT	THAP8	0.621978	0.22424
DNAJC3-DT	THEMIS2	0.459159	0.376041
DNAJC3-DT	THRA	-0.551096	0.286226
DNAJC3-DT	TICAM2	-0.528376	0.307653
DNAJC3-DT	TIGD7	-0.671431	0.183944
DNAJC3-DT	TLE5	-0.621675	0.224425
DNAJC3-DT	TLL2	0.227095	0.666996
DNAJC3-DT	TLR3	-0.40696	0.434955
DNAJC3-DT	TMEM151B	-0.507934	0.326796
DNAJC3-DT	TMEM171	0.506664	0.32804
DNAJC3-DT	TMEM184A	-0.640216	0.209201
DNAJC3-DT	TMEM39B	0.549891	0.287253
DNAJC3-DT	TMEM54	-0.514237	0.320579
DNAJC3-DT	TNFSF10	-0.561181	0.277336
DNAJC3-DT	TNS2	-0.478305	0.356001
DNAJC3-DT	TP53I11	-0.551661	0.285646
DNAJC3-DT	TP63	-0.454915	0.380868
DNAJC3-DT	TRIM22	-0.618815	0.226941
DNAJC3-DT	TRIM29	-0.499724	0.334764
DNAJC3-DT	TRIM46	-0.527147	0.308789
DNAJC3-DT	TSPAN1	-0.482477	0.351743
DNAJC3-DT	TSPOAP1	-0.474543	0.360103
DNAJC3-DT	TXLNB	-0.354321	0.498918
DNAJC3-DT	UFC1	-0.285037	0.588839
DNAJC3-DT	UGT1A1	-0.554838	0.283014
DNAJC3-DT	UGT1A7	-0.417077	0.423307
DNAJC3-DT	UNC13D	-0.7576	0.120768
DNAJC3-DT	UROD	-0.671425	0.183944
DNAJC3-DT	USP43	-0.38973	0.455385
DNAJC3-DT	USP54	0.447216	0.389324
DNAJC3-DT	VIT	-0.466036	0.369019
DNAJC3-DT	VPS52	-0.611518	0.233046
DNAJC3-DT	VSTM5	-0.477023	0.357455
DNAJC3-DT	VWA7	-0.326382	0.533839
DNAJC3-DT	WFDC2	-0.540265	0.296259
DNAJC3-DT	WHRN	-0.753407	0.123704
DNAJC3-DT	WNT4	0.598734	0.244285
DNAJC3-DT	YOD1	-0.679204	0.177378
DNAJC3-DT	YPEL1	0.54866	0.288305
DNAJC3-DT	ZAR1	-0.531857	0.304488
DNAJC3-DT	ZBTB2	-0.33471	0.523433
DNAJC3-DT	ZBTB38	-0.529104	0.306997
DNAJC3-DT	ZC3HAV1L	-0.510361	0.324387
DNAJC3-DT	ZHX2	-0.531048	0.305233
DNAJC3-DT	ZNF419	0.437488	0.399778
DNAJC3-DT	ZNF532	-0.0949547	0.858401
DNAJC3-DT	ZNF837	0.401147	0.441881
HLA-F-AS1	ABCA12	0.751819	0.124879
HLA-F-AS1	ABCB1	-0.788811	0.102075
HLA-F-AS1	ABCG4	-0.615465	0.229834
HLA-F-AS1	ABTB3	-0.773249	0.111629
HLA-F-AS1	ACKR3	0.799722	0.0957931
HLA-F-AS1	ACSL5	0.776369	0.10989
HLA-F-AS1	ACTL8	0.760231	0.119266
HLA-F-AS1	ADAMTS10	0.679752	0.176929
HLA-F-AS1	ADAMTS8	0.766325	0.116363
HLA-F-AS1	ADCY1	-0.729003	0.140074
HLA-F-AS1	ADCY7	0.718921	0.147187
HLA-F-AS1	ADGRF4	0.717699	0.148115
HLA-F-AS1	ADGRL1	0.730469	0.139062
HLA-F-AS1	AGBL1	0.577039	0.263536
HLA-F-AS1	AGTR1	-0.726449	0.141811
HLA-F-AS1	ALDH1A3	0.648942	0.20217
HLA-F-AS1	ALDH3B1	0.873823	0.0526774
HLA-F-AS1	ALPP	0.826332	0.0793774
HLA-F-AS1	ALS2CL	0.682152	0.175211
HLA-F-AS1	AMOT	-0.700148	0.161342
HLA-F-AS1	ANGPTL2	0.717897	0.14795
HLA-F-AS1	ANGPTL6	-0.710066	0.153806
HLA-F-AS1	ANO3	-0.76544	0.116644
HLA-F-AS1	ANO3-AS1	-0.762401	0.118175
HLA-F-AS1	ANXA10	0.745584	0.12867
HLA-F-AS1	ANXA8L1	0.66835	0.186403
HLA-F-AS1	APBA1	-0.781686	0.106532
HLA-F-AS1	APOL1	0.651638	0.199746
HLA-F-AS1	ARHGEF16	0.691295	0.168095
HLA-F-AS1	ASIC1	0.762176	0.118175
HLA-F-AS1	ATOH8	0.795026	0.0986484
HLA-F-AS1	ATP1A2	0.751012	0.125253
HLA-F-AS1	ATP1A3	-0.75128	0.125169
HLA-F-AS1	ATP1B2	-0.592779	0.248865
HLA-F-AS1	ATP6AP1	-0.637433	0.211291
HLA-F-AS1	B3GALT1	-0.590993	0.25047
HLA-F-AS1	B4GALNT4	0.726283	0.141944
HLA-F-AS1	BAIAP3	-0.744285	0.129458
HLA-F-AS1	BDKRB2	0.769064	0.114625
HLA-F-AS1	BSN	-0.717641	0.148141
HLA-F-AS1	C17orf113	0.481508	0.352747
HLA-F-AS1	C1orf116	0.934424	0.0225109
HLA-F-AS1	C1S	0.613307	0.231579
HLA-F-AS1	C3orf33	0.347194	0.507881
HLA-F-AS1	C4BPB	0.715325	0.149712
HLA-F-AS1	CA11	0.599146	0.243866
HLA-F-AS1	CA9	0.70036	0.161194
HLA-F-AS1	CABYR	-0.858023	0.0616631
HLA-F-AS1	CASKIN1	0.777829	0.109113
HLA-F-AS1	CATSPER1	0.767303	0.115628
HLA-F-AS1	CBLN3	0.662702	0.191138
HLA-F-AS1	CC2D2A	0.791537	0.100487
HLA-F-AS1	CCDC102A	0.885436	0.0460535
HLA-F-AS1	CDC42BPG	0.782551	0.106083
HLA-F-AS1	CDH19	-0.656581	0.196049
HLA-F-AS1	CDH3	0.809231	0.0898207
HLA-F-AS1	CDK5R2	-0.718361	0.147648
HLA-F-AS1	CGREF1	0.649185	0.201964
HLA-F-AS1	CHD1L	0.787899	0.102548
HLA-F-AS1	CHRM4	-0.821762	0.0822097
HLA-F-AS1	CLDN7	0.76828	0.115094
HLA-F-AS1	CLDN9	-0.812833	0.0875765
HLA-F-AS1	CLIP3	-0.619681	0.226241
HLA-F-AS1	CLMP	0.74312	0.130289
HLA-F-AS1	CNKSR1	0.716164	0.149069
HLA-F-AS1	COL15A1	0.764897	0.116941
HLA-F-AS1	COL18A1	-0.736057	0.13542
HLA-F-AS1	COL3A1	0.676197	0.179861
HLA-F-AS1	COL4A5	-0.775108	0.110592
HLA-F-AS1	COL7A1	-0.792856	0.0998387
HLA-F-AS1	COMMD7	0.731974	0.138268
HLA-F-AS1	COMTD1	0.724209	0.143273
HLA-F-AS1	CPNE7	0.589743	0.251648
HLA-F-AS1	CRISPLD2	-0.77926	0.10804
HLA-F-AS1	CRMP1	0.75391	0.123448
HLA-F-AS1	CRYL1	-0.815049	0.0864036
HLA-F-AS1	CSDC2	0.823489	0.0811145
HLA-F-AS1	CSGALNACT1	-0.742128	0.130983
HLA-F-AS1	CSPG4	0.734753	0.13627
HLA-F-AS1	CTNNA2	0.790193	0.101369
HLA-F-AS1	CTSS	0.603167	0.24045
HLA-F-AS1	CTSV	-0.689694	0.169267
HLA-F-AS1	CTXN1	0.78904	0.101941
HLA-F-AS1	CUX1	0.53777	0.298775
HLA-F-AS1	CXCL8	-0.722186	0.144677
HLA-F-AS1	CYB561	0.750243	0.125818
HLA-F-AS1	CYB5RL	0.726554	0.141739
HLA-F-AS1	CYP27C1	0.749304	0.126402
HLA-F-AS1	CYP4F11	-0.646065	0.204477
HLA-F-AS1	DACT3	-0.740636	0.132049
HLA-F-AS1	DAG1	0.714786	0.150154
HLA-F-AS1	DCN	0.80336	0.0934782
HLA-F-AS1	DDX6	-0.806215	0.0917108
HLA-F-AS1	DENND2D	0.714264	0.150515
HLA-F-AS1	DIO2	0.647953	0.202998
HLA-F-AS1	DMXL2	-0.653544	0.198483
HLA-F-AS1	DSC2	0.804606	0.0927553
HLA-F-AS1	DTHD1	0.667832	0.186688
HLA-F-AS1	DTX4	0.834982	0.0743698
HLA-F-AS1	DUOX1	0.649748	0.201461
HLA-F-AS1	DUSP5	-0.689605	0.16931
HLA-F-AS1	DUSP6	-0.7627	0.118043
HLA-F-AS1	E2F2	0.735054	0.136006
HLA-F-AS1	EDAR	0.761238	0.118702
HLA-F-AS1	EEF1A2	0.84448	0.0687113
HLA-F-AS1	EEF1AKMT3	0.660968	0.192524
HLA-F-AS1	EEPD1	-0.810148	0.0891529
HLA-F-AS1	EFR3B	-0.760617	0.119062
HLA-F-AS1	EGR1	-0.723312	0.143909
HLA-F-AS1	EIF5B	-0.758935	0.119963
HLA-F-AS1	ENO4	-0.731638	0.13848
HLA-F-AS1	ENPP1	-0.789901	0.101561
HLA-F-AS1	EPCAM	0.814343	0.0866844
HLA-F-AS1	EPM2A	-0.846395	0.067606
HLA-F-AS1	EVPLL	0.828904	0.0778519
HLA-F-AS1	EWSR1	-0.657162	0.19566
HLA-F-AS1	FAM131C	0.827746	0.0785665
HLA-F-AS1	FAM171A1	0.746008	0.128382
HLA-F-AS1	FAM217B	-0.602001	0.241334
HLA-F-AS1	FAM222A	-0.774487	0.110899
HLA-F-AS1	FBXL16	0.703875	0.158501
HLA-F-AS1	FEZ2	-0.737486	0.134267
HLA-F-AS1	FGFR3	-0.778232	0.10882
HLA-F-AS1	FIZ1	0.657941	0.194983
HLA-F-AS1	FKBP2	-0.75885	0.120016
HLA-F-AS1	FLT3LG	0.932713	0.0233028
HLA-F-AS1	FMN2	0.875936	0.0515252
HLA-F-AS1	FSIP2	0.630113	0.217134
HLA-F-AS1	GALC	0.718311	0.147666
HLA-F-AS1	GALNT5	0.717554	0.148196
HLA-F-AS1	GALNTL6	0.762176	0.118175
HLA-F-AS1	GAREM2	0.800578	0.0952083
HLA-F-AS1	GARIN5B	-0.907728	0.0344992
HLA-F-AS1	GBP1	0.810765	0.0887866
HLA-F-AS1	GIPC3	0.634116	0.213879
HLA-F-AS1	GJA3	-0.707406	0.155929
HLA-F-AS1	GLI1	0.79384	0.0992917
HLA-F-AS1	GP6	-0.588083	0.25321
HLA-F-AS1	GPM6B	0.747092	0.127746
HLA-F-AS1	GPR146	-0.742464	0.130805
HLA-F-AS1	GPX7	0.510389	0.324387
HLA-F-AS1	GREM1	0.84645	0.067606
HLA-F-AS1	GRIN3B	0.525591	0.309825
HLA-F-AS1	GRM1	0.725534	0.142433
HLA-F-AS1	GRPEL2	-0.793798	0.099304
HLA-F-AS1	GSAP	0.809109	0.0898706
HLA-F-AS1	GSTO2	0.749952	0.125953
HLA-F-AS1	GTF2F2	-0.760184	0.119282
HLA-F-AS1	H1-0	-0.755725	0.122202
HLA-F-AS1	H1-6	-0.70397	0.158471
HLA-F-AS1	H2AC7	0.483561	0.35082
HLA-F-AS1	H2BC9	-0.692375	0.167126
HLA-F-AS1	H3-7	-0.660132	0.193147
HLA-F-AS1	HAL	-0.793467	0.0994543
HLA-F-AS1	HEY2	-0.766366	0.116352
HLA-F-AS1	HPCAL4	-0.643997	0.206192
HLA-F-AS1	HRCT1	0.792102	0.100147
HLA-F-AS1	HRH3	-0.588743	0.252554
HLA-F-AS1	HSBP1L1	0.763348	0.117674
HLA-F-AS1	HSD3B7	0.741961	0.131085
HLA-F-AS1	HSF2BP	0.820971	0.0826001
HLA-F-AS1	HTR1D	0.692596	0.166991
HLA-F-AS1	ICOSLG	0.654003	0.198147
HLA-F-AS1	IFI44	0.943953	0.0185658
HLA-F-AS1	IFI44L	0.69268	0.166991
HLA-F-AS1	IFITM1	0.697145	0.16362
HLA-F-AS1	IFITM2	0.834052	0.0749359
HLA-F-AS1	IFNB1	-0.722005	0.144825
HLA-F-AS1	IGF2	-0.755122	0.122493
HLA-F-AS1	IGFBP5	0.680182	0.176613
HLA-F-AS1	IL1A	0.787338	0.102839
HLA-F-AS1	IL27RA	0.879864	0.0492266
HLA-F-AS1	IL7R	0.670753	0.184319
HLA-F-AS1	IMPDH1	0.518705	0.315859
HLA-F-AS1	IRF7	-0.798039	0.0967027
HLA-F-AS1	ISLR	0.689861	0.169222
HLA-F-AS1	ITGA2	-0.741473	0.13138
HLA-F-AS1	JPH2	0.654497	0.197657
HLA-F-AS1	JPH3	0.852487	0.0643996
HLA-F-AS1	KAZALD1	0.850555	0.0654125
HLA-F-AS1	KCNC4	0.74891	0.126607
HLA-F-AS1	KCNJ2	-0.759708	0.119425
HLA-F-AS1	KCNRG	-0.612097	0.232576
HLA-F-AS1	KCTD15	0.603333	0.240376
HLA-F-AS1	KIAA0319	-0.667951	0.186675
HLA-F-AS1	KIAA1522	0.709087	0.154466
HLA-F-AS1	KRT13	0.760038	0.119282
HLA-F-AS1	KRT19	0.71249	0.151932
HLA-F-AS1	KRT8	0.269329	0.609608
HLA-F-AS1	KRT80	0.6525	0.199212
HLA-F-AS1	LAMA1	0.844555	0.0686686
HLA-F-AS1	LAMB3	0.740774	0.131969
HLA-F-AS1	LAMC3	0.663062	0.190794
HLA-F-AS1	LGSN	0.761586	0.118469
HLA-F-AS1	LIMS1	-0.686704	0.171529
HLA-F-AS1	LIMS2	0.580546	0.260332
HLA-F-AS1	LINC00640	-0.766189	0.116381
HLA-F-AS1	LRFN1	0.829201	0.0776733
HLA-F-AS1	LRMDA	0.79243	0.100025
HLA-F-AS1	LRP1	0.706448	0.156663
HLA-F-AS1	LRP11	-0.689014	0.169744
HLA-F-AS1	LRP3	0.847441	0.0670524
HLA-F-AS1	LRRC3	0.470775	0.364037
HLA-F-AS1	LYRM9	-0.61846	0.227272
HLA-F-AS1	MAMDC2	0.764104	0.117321
HLA-F-AS1	MAN1C1	-0.821527	0.0823383
HLA-F-AS1	MAP1A	-0.76832	0.115094
HLA-F-AS1	MAPK3	0.922823	0.0275261
HLA-F-AS1	MARCHF3	-0.803013	0.0936635
HLA-F-AS1	MDGA1	-0.734715	0.136277
HLA-F-AS1	METTL7B	0.806874	0.091284
HLA-F-AS1	MEX3A	0.641629	0.207993
HLA-F-AS1	MFAP2	0.482169	0.352059
HLA-F-AS1	MGAT4A	-0.758698	0.120104
HLA-F-AS1	MIER3	-0.675377	0.180427
HLA-F-AS1	MISP	0.565073	0.273869
HLA-F-AS1	MMP1	-0.712495	0.151932
HLA-F-AS1	MMP2	0.496316	0.338304
HLA-F-AS1	MMRN2	0.682874	0.17464
HLA-F-AS1	MORN4	0.332221	0.526459
HLA-F-AS1	MPL	-0.71204	0.152215
HLA-F-AS1	MRAP2	0.639818	0.209431
HLA-F-AS1	MRGPRE	0.748789	0.126665
HLA-F-AS1	MT-ATP6	-0.763328	0.117674
HLA-F-AS1	MTSS2	0.846978	0.0672988
HLA-F-AS1	MVB12B	0.721617	0.145114
HLA-F-AS1	MYL9	0.781671	0.106532
HLA-F-AS1	MYO16	0.765674	0.116533
HLA-F-AS1	MYO1D	-0.608245	0.236078
HLA-F-AS1	MYO5C	0.826224	0.0794197
HLA-F-AS1	MYPN	0.777334	0.10935
HLA-F-AS1	N4BP3	0.775376	0.110416
HLA-F-AS1	NAV1	0.746306	0.12824
HLA-F-AS1	NBPF4	0.69946	0.161838
HLA-F-AS1	NBPF6	0.583448	0.257634
HLA-F-AS1	NCKAP5	0.653208	0.198722
HLA-F-AS1	NECAB2	-0.84277	0.0695548
HLA-F-AS1	NFATC1	0.913943	0.031357
HLA-F-AS1	NFATC4	0.698876	0.162264
HLA-F-AS1	NFE2	0.76221	0.118175
HLA-F-AS1	NFYA	-0.549205	0.2879
HLA-F-AS1	NGFR	-0.680362	0.176498
HLA-F-AS1	NIPAL2	0.885342	0.0460999
HLA-F-AS1	NIPAL4	0.547357	0.289405
HLA-F-AS1	NOTUM	0.763246	0.117674
HLA-F-AS1	NPR1	0.831466	0.0763748
HLA-F-AS1	NPTXR	-0.772453	0.112197
HLA-F-AS1	NPY4R	0.822376	0.0817835
HLA-F-AS1	NPY4R2	0.898685	0.0394243
HLA-F-AS1	NQO1	-0.758578	0.12019
HLA-F-AS1	NR5A2	-0.716277	0.148989
HLA-F-AS1	NRIP3	-0.741334	0.131485
HLA-F-AS1	NSFL1C	-0.708203	0.15529
HLA-F-AS1	NYNRIN	0.748135	0.127062
HLA-F-AS1	OASL	0.709159	0.15446
HLA-F-AS1	OLFM4	0.765226	0.116706
HLA-F-AS1	OSGIN1	-0.799236	0.096035
HLA-F-AS1	OTUD7A	-0.72348	0.143805
HLA-F-AS1	P2RY4	-0.703715	0.158629
HLA-F-AS1	PAG1	-0.77381	0.111276
HLA-F-AS1	PALD1	0.892097	0.0427291
HLA-F-AS1	PALM	0.777638	0.109213
HLA-F-AS1	PALMD	0.838291	0.0720458
HLA-F-AS1	PAPPA2	0.786389	0.103484
HLA-F-AS1	PARP10	0.854085	0.0636764
HLA-F-AS1	PAX5	-0.747542	0.127488
HLA-F-AS1	PCDHB11	0.608069	0.2362
HLA-F-AS1	PCDHB13	0.801866	0.0943305
HLA-F-AS1	PCDHB14	0.809191	0.0898207
HLA-F-AS1	PCDHGA10	0.740365	0.132246
HLA-F-AS1	PCDHGA4	0.730241	0.139224
HLA-F-AS1	PCDHGA5	0.624873	0.221665
HLA-F-AS1	PCDHGA6	0.81871	0.0841217
HLA-F-AS1	PCDHGA7	0.902474	0.0372935
HLA-F-AS1	PCDHGB2	0.825929	0.0796022
HLA-F-AS1	PCDHGB6	0.763553	0.117581
HLA-F-AS1	PCP2	0.76262	0.118062
HLA-F-AS1	PCSK1	0.715513	0.149558
HLA-F-AS1	PDE1A	0.792702	0.0999033
HLA-F-AS1	PDE4A	0.591204	0.250359
HLA-F-AS1	PDGFB	0.637934	0.210869
HLA-F-AS1	PDGFRB	0.521243	0.313652
HLA-F-AS1	PDLIM2	0.779947	0.10761
HLA-F-AS1	PDZD2	0.92779	0.0253775
HLA-F-AS1	PGF	-0.497849	0.33668
HLA-F-AS1	PIEZO1	-0.566838	0.272418
HLA-F-AS1	PINLYP	-0.811789	0.0881456
HLA-F-AS1	PIP5K1B	-0.679138	0.177411
HLA-F-AS1	PKP3	0.859265	0.0609232
HLA-F-AS1	PLAAT4	0.759668	0.119435
HLA-F-AS1	PLAC8L1	0.476163	0.358329
HLA-F-AS1	PLEKHA4	0.791617	0.100487
HLA-F-AS1	PLK2	0.790276	0.101369
HLA-F-AS1	PNPLA2	-0.776691	0.109669
HLA-F-AS1	POC1B-GALNT4	0.767637	0.115468
HLA-F-AS1	POLR2J3	-0.696703	0.163969
HLA-F-AS1	POU4F3	-0.667143	0.187228
HLA-F-AS1	PPAN-P2RY11	-0.623053	0.223245
HLA-F-AS1	PPM1J	-0.828766	0.0779422
HLA-F-AS1	PPP1R14C	-0.862415	0.0592119
HLA-F-AS1	PRH2	0.749464	0.126278
HLA-F-AS1	PRLR	0.819872	0.0834151
[truncated: 4,362 more rows]
