# Supplementary material for: Effects of BRD4 inhibitor JQ1 on the expression profile of super-enhancer related lncRNAs and mRNAs in cervical cancer HeLa cells
Source: PeerJ. 2024 Feb 23;12:e17035. doi: 10.7717/peerj.17035 (PMC10896078; doi:10.7717/peerj.17035)
Supplement: Supplemental Information 9 [file peerj-12-17035-s009.xlsx]

## Sheet: Supplementary Table S5
Supplementary Table S5 | Results of GO functional annotation and KEGG pathway enrichment for mRNAs
Type	ID	Description	GeneRatio	BgRatio	pvalue	p.adjust	qvalue	geneID	Count
GO BP	GO:0098742	cell-cell adhesion via plasma-membrane adhesion molecules	22/374	279/18800	4.61861e-08	0.000174815	0.000160436	MDGA1/CLDN9/SCARF2/TENM1/CDH19/DSC2/PCDHB14/PCDHB13/PCDHB11/PCDHGA10/PCDHGA6/PCDHGA7/ADGRL1/MYPN/PSG5/PCDHGA5/PCDHGB6/PCDHGB2/CLDN7/PCDHGA4/CDH3/TENM2	22
GO BP	GO:0030198	extracellular matrix organization	20/374	307/18800	3.78197e-06	0.00414313	0.00380236	MMP1/TLL2/CRISPLD2/CSGALNACT1/COL4A5/COL18A1/CTSV/LAMB3/MMP2/KAZALD1/ADAMTS10/COL15A1/LRP1/GREM1/DAG1/CTSS/COL3A1/VIT/GPM6B/ADAMTS8	20
GO BP	GO:0043062	extracellular structure organization	20/374	308/18800	3.97207e-06	0.00414313	0.00380236	MMP1/TLL2/CRISPLD2/CSGALNACT1/COL4A5/COL18A1/CTSV/LAMB3/MMP2/KAZALD1/ADAMTS10/COL15A1/LRP1/GREM1/DAG1/CTSS/COL3A1/VIT/GPM6B/ADAMTS8	20
GO BP	GO:0045229	external encapsulating structure organization	20/374	310/18800	4.37848e-06	0.00414313	0.00380236	MMP1/TLL2/CRISPLD2/CSGALNACT1/COL4A5/COL18A1/CTSV/LAMB3/MMP2/KAZALD1/ADAMTS10/COL15A1/LRP1/GREM1/DAG1/CTSS/COL3A1/VIT/GPM6B/ADAMTS8	20
GO BP	GO:0007156	homophilic cell adhesion via plasma membrane adhesion molecules	14/374	168/18800	7.01579e-06	0.00531095	0.00487412	CDH19/DSC2/PCDHB14/PCDHB13/PCDHB11/PCDHGA10/PCDHGA6/PCDHGA7/MYPN/PCDHGA5/PCDHGB6/PCDHGB2/PCDHGA4/CDH3	14
GO BP	GO:0055067	monovalent inorganic cation homeostasis	13/374	157/18800	1.59473e-05	0.0100601	0.00923266	ATP1A3/AGTR1/SLC4A4/ATP1B2/ATP6AP1/DMXL2/KCNJ2/IL1A/NPR1/MAPK3/SCNN1A/SLC12A8/ATP1A2	13
GO BP	GO:0003018	vascular process in circulatory system	17/374	263/18800	2.23102e-05	0.0120635	0.0110712	AGTR1/SLC4A4/SLC29A4/ATP1B2/SLC38A5/SH3GL2/ABCB1/TBXA2R/MMP2/HTR1D/BDKRB2/LRP1/LRP3/SRC/NPR1/TEK/ATP1A2	17
GO BP	GO:0031589	cell-substrate adhesion	20/374	364/18800	4.49867e-05	0.0207956	0.0190851	WNT4/SORBS1/LIMS1/ATP1B2/ITGA2/PDGFB/LAMB3/SORBS3/LAMC3/GBP1/LIMS2/SRC/GREM1/DAG1/TEK/COL3A1/UNC13D/VIT/OLFM4/GPM6B	20
GO BP	GO:0030004	cellular monovalent inorganic cation homeostasis	10/374	107/18800	5.45631e-05	0.0207956	0.0190851	ATP1A3/SLC4A4/ATP1B2/ATP6AP1/DMXL2/KCNJ2/IL1A/MAPK3/SCNN1A/ATP1A2	10
GO BP	GO:0045834	positive regulation of lipid metabolic process	12/374	153/18800	5.74216e-05	0.0207956	0.0190851	FGFR3/WNT4/SORBS1/ABCG4/AGTR1/PNPLA2/PDGFB/IL1A/PDGFRB/EEF1A2/SRC/TEK	12
GO BP	GO:0006883	cellular sodium ion homeostasis	5/374	22/18800	6.04363e-05	0.0207956	0.0190851	ATP1A3/ATP1B2/IL1A/SCNN1A/ATP1A2	5
GO BP	GO:0090218	positive regulation of lipid kinase activity	6/374	37/18800	8.21748e-05	0.0259193	0.0237874	FGFR3/PDGFB/PDGFRB/EEF1A2/SRC/TEK	6
GO BP	GO:0055078	sodium ion homeostasis	7/374	56/18800	0.000116862	0.0332409	0.0305068	ATP1A3/AGTR1/ATP1B2/IL1A/NPR1/SCNN1A/ATP1A2	7
GO BP	GO:0030007	cellular potassium ion homeostasis	4/374	14/18800	0.000131734	0.0332409	0.0305068	ATP1A3/ATP1B2/KCNJ2/ATP1A2	4
GO BP	GO:0035791	platelet-derived growth factor receptor-beta signaling pathway	4/374	14/18800	0.000131734	0.0332409	0.0305068	PDGFB/LRP1/PDGFRB/SRC	4
GO MF	GO:0062023	collagen-containing extracellular matrix	25/392	429/19594	2.01533e-06	0.000753735	0.00067885	ANGPTL6/COL4A5/COL18A1/COL7A1/PDGFB/LAMB3/MMP2/KAZALD1/ADAMTS10/COL15A1/ANGPTL2/LAMC3/DCN/MMRN2/GREM1/DAG1/CTSS/MFAP2/TGFB1I1/CSPG4/COL3A1/VIT/SBSPON/LAMA1/ADAMTS8	25
GO MF	GO:0005911	cell-cell junction	26/392	497/19594	8.84945e-06	0.00165485	0.00149043	SORBS1/NGFR/CLDN9/GJA3/AMOT/LIMS1/KCNJ2/CDH19/DSC2/CLMP/PKP3/CNKSR1/PDZD2/SPTBN2/EPCAM/SYNPO/LIMS2/DAG1/PDLIM2/TRIM29/TEK/CLDN7/CTNNA2/LAMA1/CDH3/ATP1A2	26
GO MF	GO:0005604	basement membrane	9/392	95/19594	0.000120834	0.0150639	0.0135673	COL4A5/COL18A1/COL7A1/LAMB3/COL15A1/LAMC3/MMRN2/DAG1/LAMA1	9
GO MF	GO:0016323	basolateral plasma membrane	14/392	226/19594	0.0001948	0.0182138	0.0164042	SLC4A4/SLC29A4/MYO1D/ENPP1/P2RY4/PDGFB/LRP1/EPCAM/DAG1/PALM/TEK/CA11/CA9/CLDN7	14
GO MF	GO:0045178	basal part of cell	15/392	269/19594	0.000362852	0.0271413	0.0244447	SLC4A4/SLC29A4/MYO1D/ENPP1/P2RY4/ITGA2/PDGFB/LRP1/EPCAM/DAG1/PALM/TEK/CA11/CA9/CLDN7	15
GO MF	GO:0015629	actin cytoskeleton	22/392	499/19594	0.000490833	0.0301036	0.0271128	SORBS1/EFR3B/MYO1D/AMOT/H1-0/CCDC102A/WHRN/MISP/KRT19/MYO5C/FMN2/SPTBN2/GBP1/SYNPO/MYL9/SRC/PDLIM2/TEK/MTSS2/ACTL8/CTNNA2/MYO16	22
GO MF	GO:0009925	basal plasma membrane	14/392	251/19594	0.000563437	0.0301036	0.0271128	SLC4A4/SLC29A4/MYO1D/ENPP1/P2RY4/PDGFB/LRP1/EPCAM/DAG1/PALM/TEK/CA11/CA9/CLDN7	14
GO MF	GO:0030018	Z disc	9/392	127/19594	0.00104243	0.0487338	0.043892	STK11/JPH2/SYNC/KRT19/SYNPO/MYL9/PDLIM2/MYPN/RYR2	9
GO MF	GO:0005890	sodium:potassium-exchanging ATPase complex	3/392	12/19594	0.00152838	0.0594108	0.0535082	ATP1A3/ATP1B2/ATP1A2	3
GO MF	GO:0005788	endoplasmic reticulum lumen	15/392	311/19594	0.00158852	0.0594108	0.0535082	WNT4/PNPLA2/COL4A5/COL18A1/MGAT4A/COL7A1/PDGFB/NOTUM/GPX7/COL15A1/IGFBP5/MAPK3/DAG1/APOL1/COL3A1	15
GO MF	GO:0031674	I band	9/392	139/19594	0.00195653	0.0645693	0.0581542	STK11/JPH2/SYNC/KRT19/SYNPO/MYL9/PDLIM2/MYPN/RYR2	9
GO MF	GO:0005925	focal adhesion	18/392	419/19594	0.00207174	0.0645693	0.0581542	FGFR3/SORBS1/SCARF2/LIMS1/ITGA2/SNTB1/MISP/TNS2/SORBS3/LRP1/PDGFRB/LIMS2/SRC/MAPK3/DAG1/TGFB1I1/CSPG4/TEK	18
GO MF	GO:0030055	cell-substrate junction	18/392	428/19594	0.00260255	0.0748733	0.0674344	FGFR3/SORBS1/SCARF2/LIMS1/ITGA2/SNTB1/MISP/TNS2/SORBS3/LRP1/PDGFRB/LIMS2/SRC/MAPK3/DAG1/TGFB1I1/CSPG4/TEK	18
GO MF	GO:0043025	neuronal cell body	19/392	482/19594	0.00406849	0.108687	0.0978885	ATP1A3/NGFR/MYO1D/MAP1A/MPL/KCNJ2/NQO1/SERPINI1/WHRN/TNS2/PCSK1/PDE1A/SPTBN2/GRIN3B/SYNPO/KCNC4/CRMP1/SNCG/ATP1A2	19
GO MF	GO:0042383	sarcolemma	8/392	131/19594	0.0048917	0.114096	0.102761	KCNJ2/SNTB1/SYNC/SLC2A5/KRT19/DAG1/RYR2/ATP1A2	8
GO CC	GO:0098631	cell adhesion mediator activity	7/378	64/18410	0.000330479	0.114736	0.107713	ITGA2/DSC2/PKP3/SIRPA/EPCAM/TRIM29/MYPN	7
GO CC	GO:0098632	cell-cell adhesion mediator activity	6/378	54/18410	0.000809742	0.114736	0.107713	DSC2/PKP3/SIRPA/EPCAM/TRIM29/MYPN	6
GO CC	GO:0005201	extracellular matrix structural constituent	11/378	172/18410	0.000875827	0.114736	0.107713	COL4A5/COL18A1/COL7A1/LAMB3/COL15A1/DCN/MMRN2/MFAP2/COL3A1/SBSPON/LAMA1	11
GO CC	GO:0099528	G protein-coupled neurotransmitter receptor activity	3/378	10/18410	0.000925643	0.114736	0.107713	HRH3/CHRM4/GRM1	3
GO CC	GO:0005158	insulin receptor binding	4/378	22/18410	0.000954544	0.114736	0.107713	IGF2/SORBS1/ENPP1/SRC	4
GO CC	GO:0048407	platelet-derived growth factor binding	3/378	11/18410	0.00125345	0.124528	0.116905	PDGFB/PDGFRB/COL3A1	3
GO CC	GO:0030020	extracellular matrix structural constituent conferring tensile strength	5/378	41/18410	0.00145041	0.124528	0.116905	COL4A5/COL18A1/COL7A1/COL15A1/COL3A1	5
GO CC	GO:0042562	hormone binding	7/378	87/18410	0.00208018	0.156274	0.146707	ATP1A3/THRA/ALDH1A3/PRLR/NPR1/NPY4R2/ATP1A2	7
GO CC	GO:0070403	NAD+ binding	3/378	16/18410	0.00394199	0.263237	0.247123	CRYL1/SIRT1/ALDH1A3	3
GO CC	GO:0008376	acetylgalactosaminyltransferase activity	4/378	34/18410	0.00498684	0.299709	0.281363	CSGALNACT1/B4GALNT4/GALNT5/GALNTL6	4
GO CC	GO:0098641	cadherin binding involved in cell-cell adhesion	3/378	18/18410	0.00557222	0.302597	0.284074	PKP3/EPCAM/TRIM29	3
GO CC	GO:0001540	amyloid-beta binding	6/378	81/18410	0.00641449	0.302597	0.284074	ATP1A3/APBA1/NGFR/ITGA2/LRP1/GSAP	6
GO CC	GO:0005501	retinoid binding	4/378	38/18410	0.0074443	0.302597	0.284074	CYP27C1/RBP1/UGT1A7/UGT1A1	4
GO CC	GO:0019840	isoprenoid binding	4/378	38/18410	0.0074443	0.302597	0.284074	CYP27C1/RBP1/UGT1A7/UGT1A1	4
GO CC	GO:0001972	retinoic acid binding	3/378	20/18410	0.00755234	0.302597	0.284074	CYP27C1/UGT1A7/UGT1A1	3
KEGG	hsa05219	Bladder cancer	7/170	41/8190	1.81937e-05	0.00480314	0.00392601	MMP1/FGFR3/CXCL8/MMP2/SRC/MAPK3/E2F2	7
KEGG	hsa04976	Bile secretion	9/170	89/8190	8.8579e-05	0.0115178	0.00941451	ATP1A3/SLC4A4/ADCY1/ATP1B2/ABCB1/ADCY7/UGT1A7/UGT1A1/ATP1A2	9
KEGG	hsa04022	cGMP-PKG signaling pathway	12/170	167/8190	0.000175066	0.0115178	0.00941451	ATP1A3/AGTR1/ADCY1/ATP1B2/NFATC1/BDKRB2/ADCY7/MYL9/NPR1/NFATC4/MAPK3/ATP1A2	12
KEGG	hsa04024	cAMP signaling pathway	14/170	221/8190	0.000193338	0.0115178	0.00941451	ATP1A3/ADCY1/ATP1B2/NFATC1/HTR1D/ADCY7/GRIN3B/MYL9/NPR1/PDE4A/MAPK3/RYR2/GLI1/ATP1A2	14
KEGG	hsa04933	AGE-RAGE signaling pathway in diabetic complications	9/170	100/8190	0.000218141	0.0115178	0.00941451	AGTR1/COL4A5/EGR1/CXCL8/NFATC1/IL1A/MMP2/MAPK3/COL3A1	9
KEGG	hsa04510	Focal adhesion	13/170	201/8190	0.000268349	0.0118074	0.00965116	PIP5K1B/SHC4/COL4A5/ITGA2/PGF/PDGFB/LAMB3/LAMC3/PDGFRB/MYL9/SRC/MAPK3/LAMA1	13
KEGG	hsa04151	PI3K-Akt signaling pathway	18/170	354/8190	0.000379568	0.0143151	0.011701	FGFR3/IGF2/NGFR/IFNB1/STK11/COL4A5/ITGA2/PGF/PDGFB/LAMB3/PRLR/FLT3LG/LAMC3/PDGFRB/MAPK3/TEK/IL7R/LAMA1	18
KEGG	hsa05161	Hepatitis B	11/170	162/8190	0.000530794	0.0175162	0.0143175	IFNB1/IRF7/ATP6AP1/CXCL8/NFATC1/SRC/NFATC4/MAPK3/TLR3/E2F2/TICAM2	11
KEGG	hsa04918	Thyroid hormone synthesis	7/170	75/8190	0.000888854	0.0236745	0.0193512	ATP1A3/ADCY1/ATP1B2/GPX7/ADCY7/DUOX1/ATP1A2	7
KEGG	hsa04960	Aldosterone-regulated sodium reabsorption	5/170	37/8190	0.000924703	0.0236745	0.0193512	ATP1A3/ATP1B2/MAPK3/SCNN1A/ATP1A2	5
KEGG	hsa04072	Phospholipase D signaling pathway	10/170	148/8190	0.00098644	0.0236745	0.0193512	AGTR1/PIP5K1B/ADCY1/SHC4/CXCL8/PDGFB/ADCY7/PDGFRB/MAPK3/GRM1	10
KEGG	hsa04964	Proximal tubule bicarbonate reclamation	4/170	23/8190	0.00116549	0.0247755	0.0202511	ATP1A3/SLC4A4/ATP1B2/ATP1A2	4
KEGG	hsa04974	Protein digestion and absorption	8/170	103/8190	0.00130196	0.0247755	0.0202511	ATP1A3/COL4A5/ATP1B2/COL18A1/COL7A1/COL15A1/COL3A1/ATP1A2	8
KEGG	hsa04921	Oxytocin signaling pathway	10/170	154/8190	0.00133593	0.0247755	0.0202511	ADCY1/KCNJ2/NFATC1/ADCY7/MYL9/SRC/NPR1/NFATC4/MAPK3/RYR2	10
KEGG	hsa04926	Relaxin signaling pathway	9/170	129/8190	0.0014077	0.0247755	0.0202511	MMP1/ADCY1/SHC4/COL4A5/MMP2/ADCY7/SRC/MAPK3/COL3A1	9
KEGG	hsa04915	Estrogen signaling pathway	9/170	138/8190	0.00224648	0.0352558	0.0288175	ADCY1/SHC4/MMP2/ADCY7/KRT19/SRC/MAPK3/GRM1/KRT13	9
